# Supplementary material for: Palladium-catalyzed Lewis acid-regulated cascade annulation of alkynes with unactivated alkenes to access diverse α-methylene-γ-lactones
Source: Royal Society of Chemistry journal article supplement (doi:10.1039/d2qo01500e), 2022-01-01

# Supporting Information

## **Palladium-catalyzed Lewis acid-regulated cascade annulation of alkynes with unactivated alkenes to access diverse $\alpha$ -methylene - $\gamma$ -lactones**

Jianxiao Li<sup>a\*</sup>, Dan He<sup>a</sup>, Bowen Wang<sup>a</sup>, Wenfang Xiong<sup>a</sup>, Chaorong Qi<sup>a</sup>, Huanfeng Jiang<sup>a</sup>

<sup>a</sup> Key Laboratory of Functional Molecular Engineering of Guangdong Province, School of Chemistry and

Chemical Engineering, South China University of Technology, Guangzhou 510640, China

E-mail: [cejxli@scut.edu.cn](mailto:cejxli@scut.edu.cn)

### **Table of Contents**

|                                                                       |     |
|-----------------------------------------------------------------------|-----|
| General methods .....                                                 | S1  |
| Typical procedure for the preparation of $\gamma$ -butyrolactone..... | S2  |
| X-ray Crystallographic analysis for product 4ad .....                 | S4  |
| X-ray Crystallographic analysis for product 5aj .....                 | S5  |
| Procedure for the synthesis of 3-arylpropionic acids.....             | S6  |
| Characterization data for all products .....                          | S7  |
| NMR Spectra for all the compounds.....                                | S42 |

## General methods

Melting points were measured using a melting point instrument and are uncorrected.  $^1\text{H}$  and  $^{13}\text{C}$  NMR spectra were recorded on a 400 MHz NMR spectrometer. The chemical shifts are referenced to signals at 7.24 and 77.0 ppm, respectively, and chloroform was used as a solvent with TMS as the internal standard. IR spectra were obtained with an infrared spectrometer on either potassium bromide pellets or liquid films between two potassium bromide pellets. GC-MS data were obtained using electron ionization. HRMS was carried out on a high-resolution mass spectrometer (LCMS-IT-TOF). TLC was performed using commercially available 100-400 mesh silica gel plates (GF<sub>254</sub>). Unless otherwise noted, purchased chemicals were used without further purification.

### Typical procedure for the preparation of (*Z*)- $\alpha$ -methylene- $\gamma$ -butyrolactone

A mixture of PdCl<sub>2</sub> (10 mol %), MgCl<sub>2</sub> (4 equiv) and CH<sub>3</sub>CN (2 mL) was added to a tube equipped with a stir-bar. Then, alkynic acid (**1**, 0.2 mmol), and alkene (**2**, 0.3 mmol) were added to the tube under air and stirred at room temperature for 16 h. After the reaction was finished, the reaction was quenched by water and extracted with CH<sub>2</sub>Cl<sub>2</sub> three times. The combined organic layers were dried over anhydrous Na<sub>2</sub>SO<sub>4</sub> and evaporated under vacuum. The residue was purified by flash column chromatography on silica gel (hexanes/ethyl acetate: 20:1) to afford the desired products.

### Typical procedure for the preparation of (*E*)- $\alpha$ -methylene- $\gamma$ -butyrolactone

A mixture of PdCl<sub>2</sub> (10 mol %), AlCl<sub>3</sub> (6 equiv) and CH<sub>3</sub>CN (2 mL) was added to a tube equipped with a stir-bar. Then, alkyne acid (**1**, 0.2 mmol), and alkene (**2**, 0.3 mmol) were added to the tube under air and stirred at 35 °C for 18 h. After the reaction was finished, the reaction was quenched by water and extracted with CH<sub>2</sub>Cl<sub>2</sub> three times. The combined organic layers were dried over anhydrous Na<sub>2</sub>SO<sub>4</sub> and evaporated under vacuum. The residue was purified by flash column chromatography on silica gel (hexanes/ethyl acetate: 20:1) to afford the desired products.

### The structural formula of ionic liquid of [HOEMim]Cl

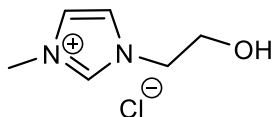

1-(2-Hydroxyethyl)-3-methylimidazolium Chloride

## X-ray Crystallographic analysis for product 4ad

The CCDC number of the compound **4ad** is 2159530.

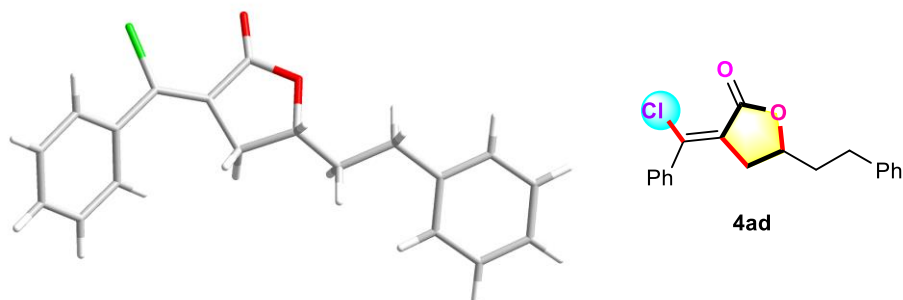

Crystal Data and Structure Refinement for Product **4ad**

|                                   |                                                  |
|-----------------------------------|--------------------------------------------------|
| Empirical formula                 | C <sub>19</sub> H <sub>17</sub> ClO <sub>2</sub> |
| Formula weight                    | 312.77                                           |
| Temperature                       | 150(10) K                                        |
| Wavelength                        | 0.71073 Å                                        |
| Crystal system                    | monoclinic                                       |
| Space group                       | P2 <sub>1</sub> /n                               |
| Unit cell dimensions              | a = 20.2818(11) Å, α = 90.00°                    |
|                                   | b = 7.3718(4) Å, β = 91.757(2)°                  |
|                                   | c = 20.3050(13) Å, γ = 90.00°                    |
| Density (calculated)              | 1.369                                            |
| Absorption coefficient            | 0.083                                            |
| F(000)                            | 1312                                             |
| Crystal size                      | 0.12 × 0.08 × 0.04                               |
| Theta range for data collection   | 4.014 to 52.786                                  |
| Index ranges                      | -25 ≤ h ≤ 25, -9 ≤ k ≤ 8, -25 ≤ l ≤ 19           |
| Reflections collected             | 21189                                            |
| Independent reflections           | 6145                                             |
| Completeness to theta = 29.55°    | 98.80%                                           |
| Absorption correction             | multi-scan                                       |
| Refinement method                 | Full-matrix least-squares on F <sup>2</sup>      |
| Data/restraints/parameters        | 6145/0/398                                       |
| Goodness-of-fit on F <sup>2</sup> | 1.055                                            |
| Final R indices [I > 2σ(I)]       | R1 = 0.0608, wR2 = 0.1219                        |
| R indices (all data)              | R1 = 0.1110, wR2 = 0.1508                        |



## X-ray Crystallographic analysis for product **5aj**

The CCDC number of the compound **5aj** is 2159532.

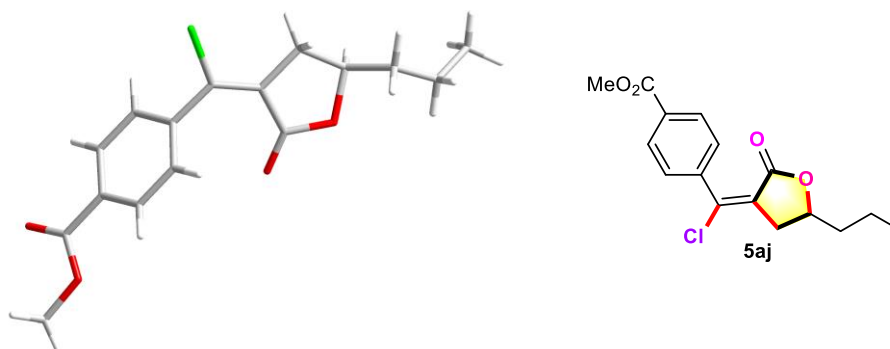

Crystal Data and Structure Refinement for Product **5aj**

|                                   |                                                  |
|-----------------------------------|--------------------------------------------------|
| Empirical formula                 | C <sub>16</sub> H <sub>17</sub> ClO <sub>4</sub> |
| Formula weight                    | 308.74                                           |
| Temperature                       | 160(10) K                                        |
| Wavelength                        | 0.71073 Å                                        |
| Crystal system                    | monoclinic                                       |
| Space group                       | P2 <sub>1</sub> /c                               |
| Unit cell dimensions              | a = 5.6341(10) Å, α = 90.00°                     |
|                                   | b = 30.099(5) Å, β = 96.992(6) °                 |
|                                   | c = 9.1511(14) Å, γ = 90.00°                     |
| Density (calculated)              | 1.331                                            |
| Absorption coefficient            | 0.083                                            |
| F(000)                            | 648                                              |
| Crystal size                      | 0.12 × 0.08 × 0.05                               |
| Theta range for data collection   | 4.684 to 52.208                                  |
| Index ranges                      | -6 ≤ h ≤ 6, -36 ≤ k ≤ 37 -11 ≤ l ≤ 11            |
| Reflections collected             | 17017                                            |
| Independent reflections           | 3036                                             |
| Completeness to theta = 29.55°    | 99.60%                                           |
| Absorption correction             | multi-scan                                       |
| Refinement method                 | Full-matrix least-squares on F <sup>2</sup>      |
| Data/restraints/parameters        | 3036/0/210                                       |
| Goodness-of-fit on F <sup>2</sup> | 1.043                                            |
| Final R indices [I > 2σ(I)]       | R1 = 0.0455, wR2 = 0.1003                        |
| R indices (all data)              | R1 = 0.0702, wR2 = 0.1158                        |

### Procedure for the synthesis of 3-arylpropionic acids <sup>[1]</sup>

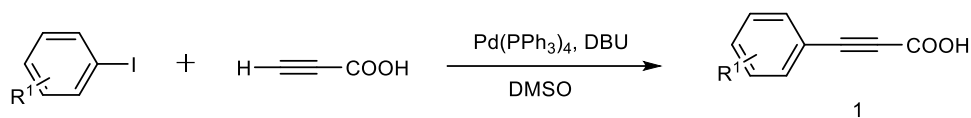

A 25-mL round bottom flask equipped with a magnetic stir bar was sequentially charged with aryl iodide (5.0 mmol), DBU (1.80 mL, 12 mmol), Pd(PPh<sub>3</sub>)<sub>4</sub> (144.4 mg, 2.5 mol %) and DMSO (6 mL). A solution of propiolic acid (420 mg, 6.0 mmol) in DMSO (6 mL) was added into the flask. The mixture was stirred at room temperature for 12 h. After the reaction was complete, EtOAc (20 mL) was poured into the reaction mixture. The reaction mixture was extracted with saturated aqueous NaHCO<sub>3</sub> solution. The aqueous layer was separated, acidified to pH 2.0 by addition of cold HCl aqueous solution (1 N), and extracted with CH<sub>2</sub>Cl<sub>2</sub>. The combined organic layers were dried with anhydrous Na<sub>2</sub>SO<sub>4</sub> and filtered, and the solvent was removed under reduced pressure. The resulting crude product was purified by column chromatography on silica gel (eluent: petroleum ether/ethyl acetate = 4:1, with 1% v/v HOAc) to afford 3-arylpropionic acids 1.

[1] Kyungho P, Thiruvengadam P, Ayoung P, Sunwoo L. *Tetrahedron Lett*, 2012, 53: 733-737.

### Characterization data for all products

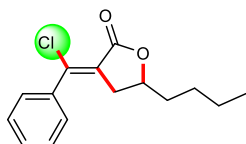

(Z)-5-Butyl-3-(chloro(phenyl)methylene)dihydrofuran-2(3H)-one (**3aa**): Yield: 83% as a yellow oil;  $^1\text{H NMR}$  (400 MHz,  $\text{CDCl}_3$ )  $\delta$  7.56 - 7.47 (m, 2H), 7.49 - 7.41 (m, 3H), 4.55-4.30 (m, 1H), 3.12 (dd,  $J = 16.5, 7.2$  Hz, 1H), 2.72 (dd,  $J = 16.5, 6.7$  Hz, 1H), 1.82 - 1.64 (m, 1H), 1.62 - 1.51 (m, 1H), 1.52 - 1.32 (m, 2H), 0.94 (t,  $J = 7.3$  Hz, 3H);  $^{13}\text{C NMR}$  (100 MHz,  $\text{CDCl}_3$ )  $\delta$  165.6, 162.2, 130.6, 130.5, 129.8, 129.4, 129.1, 129.0, 128.7, 128.5, 128.4, 128.2, 127.9, 127.0, 115.3 ppm;  $\nu_{\text{max}}(\text{KBr})/\text{cm}^{-1}$  2959, 2926, 2854, 1755, 1631, 1492, 1461; MS (EI)  $m/z$  89, 115, 150, 179, 250; HRMS-ESI ( $m/z$ ): calcd for  $\text{C}_{14}\text{H}_{16}\text{ClO}_2$ ,  $[\text{M} + \text{H}]^+$ : 251.0834, found: 251.0833.

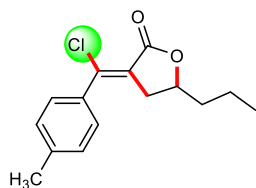

(Z)-3-(Chloro(*p*-tolyl)methylene)-5-propyldihydrofuran-2(3H)-one (**3ab**): Yield: 80% as a yellow oil;  $^1\text{H NMR}$  (400 MHz,  $\text{CDCl}_3$ )  $\delta$  7.45 - 7.37 (m, 2H), 7.34 - 7.21 (m, 2H), 4.48 - 4.35 (m, 1H), 3.13 (dd,  $J = 16.4, 7.2$  Hz, 1H), 2.73 (dd,  $J = 16.4, 6.7$  Hz, 1H), 2.42 (s, 3H), 1.81 - 1.69 (m, 2H), 1.62 - 1.53 (m, 1H), 1.49 - 1.34 (m, 2H), 0.95 (t,  $J = 7.2$  Hz, 3H);  $^{13}\text{C NMR}$  (101 MHz,  $\text{CDCl}_3$ )  $\delta$  167.7, 140.6, 139.7, 135.0, 129.2, 128.2, 122.3, 76.0, 38.0, 37.3, 21.4, 18.2, 13.8 ppm;  $\nu_{\text{max}}(\text{KBr})/\text{cm}^{-1}$  2960, 2929, 2872, 1755, 1628, 1508, 1460; MS (EI)  $m/z$  89, 115, 139, 164, 221, 264; HRMS-ESI ( $m/z$ ): calcd for  $\text{C}_{15}\text{H}_{18}\text{ClO}_2$ ,  $[\text{M} + \text{H}]^+$ : 265.0990, found: 265.0986.

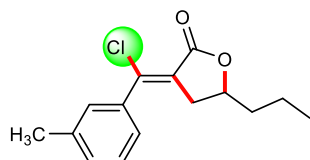

(*Z*)-3-(Chloro(*m*-tolyl)methylene)-5-propyldihydrofuran-2(3H)-one (**3ac**): Yield: 78% as a black oil;  $^1\text{H NMR}$  (400 MHz,  $\text{CDCl}_3$ )  $\delta$  7.37 - 7.32 (m, 2H), 7.30 - 7.24 (m, 2H), 4.46 - 4.36 (m, 1H), 3.12 (dd,  $J = 16.5, 7.2$  Hz, 1H), 2.72 (dd,  $J = 16.5, 6.7$  Hz, 1H), 2.42 (s, 3H), 1.81 - 1.68 (m, 1H), 1.61 - 1.55 (m, 1H), 1.51 - 1.39 (m, 2H), 0.96 (t,  $J = 7.3$  Hz, 3H).  $^{13}\text{C NMR}$  (101 MHz,  $\text{CDCl}_3$ )  $\delta$  167.6, 139.7, 138.5, 137.9, 130.9, 128.7, 128.4, 125.2, 122.8, 76.1, 38.0, 37.2, 21.4, 18.2, 13.9 ppm;  $\nu_{\text{max}}(\text{KBr})/\text{cm}^{-1}$  2958, 2925, 2855, 1755, 1630, 1460; MS (EI)  $m/z$  89, 115, 139, 164, 221, 264; HRMS-ESI ( $m/z$ ): calcd for  $\text{C}_{15}\text{H}_{18}\text{ClO}_2$ ,  $[\text{M}+\text{H}]^+$ : 265.0990, found: 265.0986.

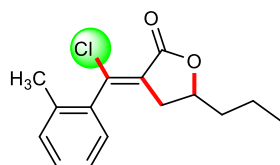

(*Z*)-3-(Chloro(*o*-tolyl)methylene)-5-propyldihydrofuran-2(3H)-one (**3ad**): Yield: 65% as a white solid; mp = 64.7-65.5 °C;  $^1\text{H NMR}$  (400 MHz,  $\text{CDCl}_3$ )  $\delta$  7.50 - 7.41 (m, 5H), 4.49 - 4.38 (m, 1H), 3.11 (dd,  $J = 16.5, 7.1$  Hz, 1H), 2.71 (dd,  $J = 16.5, 6.7$  Hz, 1H), 1.59 - 1.53 (m, 1H), 1.51 - 1.38 (m, 2H), 0.96 (t,  $J = 7.3$  Hz, 3H);  $^{13}\text{C NMR}$  (101 MHz,  $\text{CDCl}_3$ )  $\delta$  167.3, 138.1, 136.3, 136.2, 129.6, 128.9, 123.5, 76.0, 37.9, 37.2, 29.7, 18.2, 13.8 ppm;  $\nu_{\text{max}}(\text{KBr})/\text{cm}^{-1}$  2958, 2922, 2851, 1752, 1629, 1590, 1488, 1462; MS (EI)  $m/z$  81, 108, 115, 152, 183, 264; HRMS-ESI ( $m/z$ ): calcd for  $\text{C}_{15}\text{H}_{18}\text{ClO}_2$ ,  $[\text{M}+\text{H}]^+$ : 265.0990, found: 265.0986.

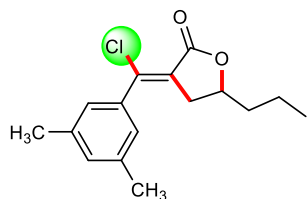

(Z)-3-(Chloro(3,5-dimethylphenyl)methylene)-5-propyldihydrofuran-2(3H)-one (**3ae**): Yield: 76% as a yellow oil;  $^1\text{H NMR}$  (400 MHz,  $\text{CDCl}_3$ )  $\delta$  7.08 (dd,  $J = 10.1, 1.8$  Hz, 3H), 4.47 - 4.36 (m, 1H), 3.12 (dd,  $J = 16.5, 7.2$  Hz, 1H), 2.70 (dd,  $J = 16.5, 6.7$  Hz, 1H), 2.37 (s, 6H), 1.78 - 1.66 (m, 1H), 1.62 - 1.55 (m, 1H), 1.53 - 1.37 (m, 2H), 0.95 (t,  $J = 7.3$  Hz, 3H);  $^{13}\text{C NMR}$  (101 MHz,  $\text{CDCl}_3$ )  $\delta$  167.7, 139.8, 138.3, 137.9, 131.8, 125.8, 122.6, 76.1, 38.0, 37.2, 21.3, 18.2, 13.8 ppm;  $\nu_{\text{max}}(\text{KBr})/\text{cm}^{-1}$  2961, 2872, 2736, 1748, 1631, 1600, 1463; MS (EI)  $m/z$  77, 91, 115, 143, 178, 207, 278; HRMS-ESI ( $m/z$ ): calcd for  $\text{C}_{16}\text{H}_{20}\text{ClO}_2$   $[\text{M}+\text{H}]^+$ : 279.1147, found 279.1144.

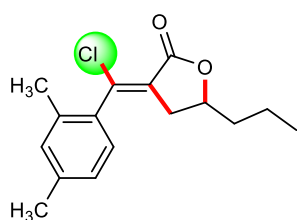

(Z)-3-(Chloro(2,4-dimethylphenyl)methylene)-5-propyldihydrofuran-2(3H)-one (**3af**): Yield: 63% as a yellow oil;  $^1\text{H NMR}$  (400 MHz,  $\text{CDCl}_3$ )  $\delta$  7.12 - 7.01 (m, 3H), 4.57 (dd,  $J = 7.5, 5.8$  Hz, 1H), 3.34 (dd,  $J = 17.8, 7.9$  Hz, 1H), 2.84 (dd,  $J = 17.8, 5.9$  Hz, 1H), 2.36 (s, 3H), 2.28 (s, 3H), 1.85 - 1.73 (m, 1H), 1.72 - 1.62 (m, 1H), 1.57 - 1.44 (m, 2H), 1.01 (t,  $J = 7.3$  Hz, 3H);  $^{13}\text{C NMR}$  (101 MHz,  $\text{CDCl}_3$ )  $\delta$  165.9, 145.0, 139.7, 135.4, 133.0, 131.1, 128.30, 126.6, 76.0, 38.5, 35.9, 21.4, 19.2, 18.1, 13.8 ppm;  $\nu_{\text{max}}(\text{KBr})/\text{cm}^{-1}$  2960, 2926, 2872, 1760, 1658, 1613, 1459; MS (EI)  $m/z$  77, 91, 115, 128, 143, 208, 261, 278; HRMS-ESI ( $m/z$ ): calcd for  $\text{C}_{16}\text{H}_{20}\text{ClO}_2$ ,  $[\text{M}+\text{H}]^+$ : 279.1147, found 279.1143.

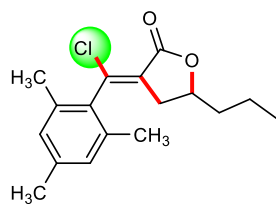

(Z)-3-(Chloro(mesityl)methylene)-5-propyldihydrofuran-2(3H)-one (**3ag**): Yield: 62% as a yellow solid; mp = 73.0 - 73.6 °C;  $^1\text{H NMR}$  (400 MHz,  $\text{CDCl}_3$ )  $\delta$  6.92 (s, 2H), 4.70 - 4.41 (m, 1H), 3.35 (dd,  $J = 17.8, 8.0$  Hz, 1H), 2.86 (dd,  $J = 17.8, 5.7$  Hz, 1H), 2.31 (s, 3H), 2.23 (s, 6H), 1.85 - 1.73 (m, 1H), 1.73 - 1.62 (m, 1H), 1.58 - 1.40 (m, 2H), 1.01 (t,  $J = 7.3$  Hz, 3H);  $^{13}\text{C NMR}$  (101 MHz,  $\text{CDCl}_3$ )  $\delta$  165.7, 144.6, 139.1, 135.1, 135.1, 132.8, 128.5, 128.4, 126.4, 76.0, 38.6, 35.6, 21.27, 19.4, 19.4, 18.0, 13.8 ppm;  $\nu_{\text{max}}(\text{KBr})/\text{cm}^{-1}$  2960, 2928, 2873, 1760, 1661, 1611, 1458; MS (EI)  $m/z$  77, 91, 143, 157, 222, 257, 292; HRMS-ESI ( $m/z$ ): calcd for  $\text{C}_{17}\text{H}_{22}\text{ClO}_2$ ,  $[\text{M}+\text{H}]^+$ : 293.1303, found 293.1300.

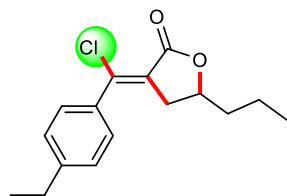

(Z)-3-(Chloro(4-ethylphenyl)methylene)-5-propyldihydrofuran-2(3H)-one (**3ah**): Yield: 83% as a black oil;  $^1\text{H NMR}$  (400 MHz,  $\text{CDCl}_3$ )  $\delta$  7.44 (d,  $J = 8.3$  Hz, 2H), 7.28 (d,  $J = 8.1$  Hz, 2H), 4.49 - 4.34 (m, 1H), 3.14 (dd,  $J = 16.4, 7.2$  Hz, 1H), 2.80 - 2.65 (m, 3H), 1.82 - 1.65 (m, 1H), 1.64 - 1.52 (m, 1H), 1.51 - 1.35 (m, 2H), 1.28 (t,  $J = 7.6$  Hz, 3H), 0.95 (t,  $J = 7.2$  Hz, 3H);  $^{13}\text{C NMR}$  (101 MHz,  $\text{CDCl}_3$ )  $\delta$  167.7, 146.8, 139.7, 135.2, 128.3, 128.0, 122.3, 76.0, 37.9, 37.3, 3.73, 18.2, 15.3, 13.8 ppm;  $\nu_{\text{max}}(\text{KBr})/\text{cm}^{-1}$  2966, 2930, 2873, 1762, 1686, 1629, 1508, 1460; MS (EI)  $m/z$  77, 115, 128, 143, 178, 235, 278; HRMS-ESI ( $m/z$ ): calcd for  $\text{C}_{16}\text{H}_{20}\text{ClO}_2$   $[\text{M}+\text{H}]^+$ : 279.1147, found 279.1144.

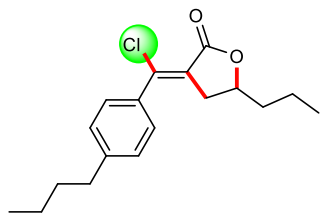

(*Z*)-3-((4-Butylphenyl)chloromethylene)-5-propyldihydrofuran-2(3H)-one (**3ai**): Yield: 82% as a black oil;  $^1\text{H}$  NMR (400 MHz,  $\text{CDCl}_3$ )  $\delta$  7.43 (d,  $J = 8.1$  Hz, 2H), 7.25 (d,  $J = 8.1$  Hz, 2H), 4.45 - 4.34 (m, 1H), 3.14 (dd,  $J = 16.4, 7.2$  Hz, 1H), 2.74 (dd,  $J = 16.5, 6.7$  Hz, 1H), 2.69 - 2.62 (m, 2H), 1.77 - 1.68 (m, 1H), 1.68 - 1.60 (m, 2H), 1.60 - 1.53 (m, 1H), 1.53 - 1.45 (m, 1H), 1.44 - 1.35 (m, 3H), 0.95 (t,  $J = 7.3$  Hz, 6H);  $^{13}\text{C}$  NMR (101 MHz,  $\text{CDCl}_3$ )  $\delta$  167.8, 145.6, 139.7, 135.1, 128.5, 128.2, 122.3, 76.03, 38.0, 37.4, 35.5, 33.3, 22.4, 18.2, 13.9, 13.8 ppm;  $\nu_{\text{max}}(\text{KBr})/\text{cm}^{-1}$  2959, 2931, 2870, 1758, 1628, 1508, 1462; MS (EI)  $m/z$  91, 115, 128, 163, 206, 263, 306; HRMS-ESI ( $m/z$ ): calcd for  $\text{C}_{18}\text{H}_{24}\text{ClO}_2$ ,  $[\text{M}+\text{H}]^+$ : 307.1460, found 307.1457.

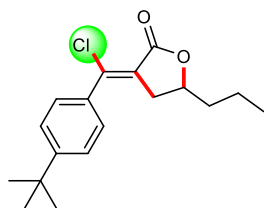

(*Z*)-3-((4-*tert*-Butylphenyl)chloromethylene)-5-propyldihydrofuran-2(3H)-one (**3aj**): Yield: 79% as a white solid; mp = 179.0 - 179.8 °C;  $^1\text{H}$  NMR (400 MHz,  $\text{CDCl}_3$ )  $\delta$  7.46 (s, 4H), 4.50 - 4.35 (m, 1H), 3.17 (dd,  $J = 16.4, 7.2$  Hz, 1H), 2.76 (dd,  $J = 16.5, 6.7$  Hz, 1H), 1.81 - 1.65 (m, 1H), 1.64 - 1.53 (m, 1H), 1.51 - 1.38 (m, 2H), 1.36 (s, 9H), 0.96 (t,  $J = 7.3$  Hz, 3H);  $^{13}\text{C}$  NMR (100 MHz,  $\text{CDCl}_3$ )  $\delta$  167.8, 153.7, 139.6, 134.9, 128.1, 125.5, 122.3, 76.0, 38.0, 37.4, 34.9, 31.2, 18.2, 13.8

ppm;  $\nu_{\max}(\text{KBr})/\text{cm}^{-1}$  2962, 2931, 2871, 1757, 1628, 1508, 1463; MS (EI)  $m/z$  91, 115, 141, 191, 291, 306; HRMS-ESI ( $m/z$ ): calcd for  $\text{C}_{18}\text{H}_{24}\text{ClO}_2$ ,  $[\text{M}+\text{H}]^+$ : 307.1460, found 307.1455.

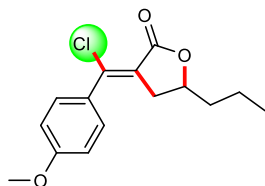

(Z)-3-(Chloro(4-methoxyphenyl)methylene)-5-propyldihydrofuran-2(3H)-one (**3ak**): Yield: 68% as a white solid; mp = 74.1 - 74.5°C;  $^1\text{H}$  NMR (400 MHz,  $\text{CDCl}_3$ )  $\delta$  7.53 - 7.45 (m, 2H), 7.03 - 6.91 (m, 2H), 4.45 - 4.32 (m, 1H), 3.88 (s, 3H), 3.15 (dd,  $J = 16.3, 7.2$  Hz, 1H), 2.75 (dd,  $J = 16.3, 6.7$  Hz, 1H), 1.78 - 1.69 (m, 1H), 1.61 - 1.54 (m, 1H), 1.53 - 1.36 (m, 2H), 0.96 (t,  $J = 7.3$  Hz, 3H);  $^{13}\text{C}$  NMR (100 MHz,  $\text{CDCl}_3$ )  $\delta$  167.9, 160.9, 139.5, 130.0, 121.5, 113.8, 76.0, 55.5, 38.0, 37.5, 29.7, 18.2, 13.8 ppm;  $\nu_{\max}(\text{KBr})/\text{cm}^{-1}$  3482, 2958, 2925, 2853, 1753, 1628, 1604, 1509, 1462; MS (EI)  $m/z$  77, 102, 145, 180, 237, 280; HRMS-ESI ( $m/z$ ): calcd for  $\text{C}_{15}\text{H}_{18}\text{ClO}_3$ ,  $[\text{M}+\text{H}]^+$ : 281.0939, found 281.0935.

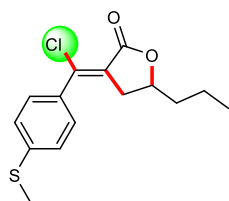

(Z)-3-(Chloro(4-(methylthio)phenyl)methylene)-5-propyldihydrofuran-2(3H)-one (**3al**) Yield: 81% as a yellow solid; mp = 87.9 - 88.3 °C;  $^1\text{H}$  NMR (400 MHz,  $\text{CDCl}_3$ )  $\delta$  7.44 (d,  $J = 8.5$  Hz, 2H), 7.34 - 7.22 (m, 2H), 4.41 (q,  $J = 7.0$  Hz, 1H), 3.14 (dd,  $J = 16.4, 7.2$  Hz, 1H), 2.74 (dd,  $J = 16.4, 6.7$  Hz, 1H), 2.54 (s, 3H), 1.81 - 1.68 (m, 1H), 1.62 - 1.53 (m, 1H), 1.53 - 1.37 (m, 2H), 0.95 (t,  $J = 7.2$  Hz, 3H);  $^{13}\text{C}$  NMR (101 MHz,  $\text{CDCl}_3$ )  $\delta$  167.7, 142.2, 139.1, 133.9, 128.6, 125.4,



122.4, 76.0, 37.9, 37.4, 18.2, 15.1, 13.8 ppm;  $\nu_{\max}(\text{KBr})/\text{cm}^{-1}$  2959, 2928, 2871, 1752, 1625, 1590, 1398; MS (EI)  $m/z$  81, 115, 146, 161, 196, 253, 296; HRMS-ESI ( $m/z$ ): calcd for  $\text{C}_{15}\text{H}_{19}\text{ClO}_2\text{S}$ ,  $[\text{M}+\text{H}]^+$ : 297.0711, found 297.0710.

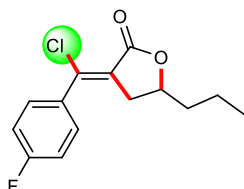

(*Z*)-3-(Chloro(4-fluorophenyl)methylene)-5-propyldihydrofuran-2(3H)-one (**3am**): Yield: 79% as a yellow solid; mp = 49.3 - 49.6°C;  $^1\text{H}$  NMR (400 MHz,  $\text{CDCl}_3$ )  $\delta$  7.56 - 7.47 (m, 2H), 7.14 (t,  $J$  = 8.5 Hz, 2H), 4.54 - 4.32 (m, 1H), 3.10 (dd,  $J$  = 16.5, 7.2 Hz, 1H), 2.71 (dd,  $J$  = 16.5, 6.7 Hz, 1H), 1.86 - 1.63 (m, 1H), 1.61 - 1.54 (m, 1H), 1.53 - 1.34 (m, 2H), 0.95 (t,  $J$  = 7.2 Hz, 3H)  $^{13}\text{C}$  NMR (100 MHz,  $\text{CDCl}_3$ )  $\delta$  167.4, 163.4 (d,  $J$  = 252.1 Hz), 138.3, 133.9 (d,  $J$  = 3.5 Hz), 130.4 (d,  $J$  = 8.6 Hz), 123.2, 115.7 (d,  $J$  = 21.9 Hz), 76.0, 37.9, 37.2, 18.2, 13.7 ppm;  $\nu_{\max}(\text{KBr})/\text{cm}^{-1}$  2962, 2934, 2874, 1756, 1632, 1600, 1506, 1462; MS (EI)  $m/z$  89, 107, 133, 168, 225, 268; HRMS-ESI ( $m/z$ ): calcd for  $\text{C}_{14}\text{H}_{15}\text{ClFO}_2$   $[\text{M}+\text{H}]^+$ : 269.0739, found: 269.0735

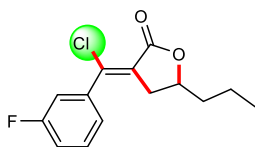

(*Z*)-3-(Chloro(3-fluorophenyl)methylene)-5-propyldihydrofuran-2(3H)-one (**3an**): Yield: 78% as a yellow oil;  $^1\text{H}$  NMR (400 MHz,  $\text{CDCl}_3$ )  $\delta$  7.44 (td,  $J$  = 8.0, 5.8 Hz, 1H), 7.28 (s, 1H), 7.25 - 7.21 (m, 1H), 7.21 - 7.11 (m, 1H), 4.53 - 4.36 (m, 1H), 3.13 (dd,  $J$  = 16.6, 7.2 Hz, 1H), 2.72 (dd,  $J$  = 16.6, 6.7 Hz, 1H), 1.79 - 1.70 (m, 1H), 1.57 - 1.51 (m, 1H), 1.50 - 1.37 (m, 2H), 0.97 (t,  $J$  = 7.3 Hz, 3H);  $^{13}\text{C}$  NMR (101 MHz,  $\text{CDCl}_3$ )  $\delta$  167.2, 161.2, 139.7, 130.3 (d,  $J$  = 8.4 Hz), 123.9 (d,  $J$  = 3.4

Hz), 117.2 (d,  $J = 21.1$  Hz), 115.4 (d,  $J = 23.1$  Hz), 76.1, 38.0, 37.1, 29.7, 18.2, 13.8 ppm;  
 $\nu_{\max}(\text{KBr})/\text{cm}^{-1}$  2959, 2924, 2853, 1757, 1633, 1583, 1482, 1463; MS (EI)  $m/z$  83, 107, 133, 168,  
225, 268; HRMS-ESI ( $m/z$ ): calcd for  $\text{C}_{14}\text{H}_{15}\text{ClFO}_2$   $[\text{M}+\text{H}]^+$ : 269.0739, found: 269.0735.

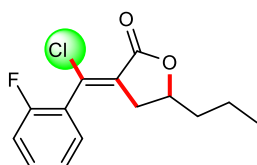

(*Z*)-3-(Chloro(2-fluorophenyl)methylene)-5-propyldihydrofuran-2(3H)-one (**3ao**): Yield: 78% as a yellow oil;  $^1\text{H}$  NMR (400 MHz,  $\text{CDCl}_3$ )  $\delta$  7.56 - 7.37 (m, 2H), 7.35 - 7.19 (m, 1H), 7.15 (m, 1H), 4.61 - 4.32 (m, 1H), 2.91 (dd,  $J = 16.9, 7.3$  Hz, 1H), 2.55 (dd,  $J = 16.9, 6.6$  Hz, 1H), 1.93 - 1.64 (m, 1H), 1.59 - 1.52 (m, 1H), 1.52 - 1.36 (m, 2H), 0.94 (t,  $J = 7.3$  Hz, 3H);  $^{13}\text{C}$  NMR (101 MHz,  $\text{CDCl}_3$ )  $\delta$  166.9, 158.2 (d,  $J = 251.8$  Hz), 132.7, 132.0 (d,  $J = 8.5$  Hz), 130.1 (d,  $J = 2.2$  Hz), 126.3, 125.7 (d,  $J = 14.6$  Hz), 124.7 (d,  $J = 3.7$  Hz), 116.3 (d,  $J = 21.5$  Hz), 76.2, 38.0, 36.0, 36.0, 18.2, 13.7 ppm;  $\nu_{\max}(\text{KBr})/\text{cm}^{-1}$  2962, 2934, 2873, 1756, 1446, 1611, 1489, 1450; MS (EI)  $m/z$  83, 107, 133, 168, 197, 225, 268; HRMS-ESI ( $m/z$ ): calcd for  $\text{C}_{14}\text{H}_{15}\text{ClFO}_2$   $[\text{M}+\text{H}]^+$ : 269.0739, found: 269.0735.

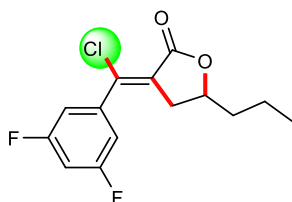

(*Z*)-3-(Chloro(3,5-difluorophenyl)methylene)-5-propyldihydrofuran-2(3H)-one (**3ap**): Yield: 79% as a yellow solid; mp = 82.8 - 83.3 °C;  $^1\text{H}$  NMR (400 MHz,  $\text{CDCl}_3$ )  $\delta$  7.10 - 7.01 (m, 2H), 6.96 - 6.85 (m, 1H), 4.54 - 4.30 (m, 1H), 3.13 (dd,  $J = 16.7, 7.2$  Hz, 1H), 2.71 (dd,  $J = 16.7, 6.6$  Hz, 1H), 1.80 - 1.70

(m, 1H), 1.58 (ddd,  $J = 19.0, 8.4, 4.8$  Hz, 1H), 1.53 - 1.36 (m, 2H), 0.96 (t,  $J = 7.3$  Hz, 3H);  $^{13}\text{C}$  NMR (100 MHz,  $\text{CDCl}_3$ )  $\delta$  166.9, 164.0 (d,  $J = 12.8$  Hz), 161.5 (d,  $J = 12.7$  Hz), 140.6 (t,  $J = 9.7$  Hz), 136.3, 124.8, 111.6 (d,  $J = 7.9$  Hz), 111.4 (d,  $J = 7.9$  Hz), 105.7 (t,  $J = 25.2$  Hz), 105.4, 76.1, 37.9, 37.0, 18.2, 13.7 ppm;  $\nu_{\text{max}}(\text{KBr})/\text{cm}^{-1}$  3092, 2965, 2931, 2880, 2861, 1757, 1640, 1592, 1434; MS (EI)  $m/z$  75, 101, 125, 151, 186, 243, 286; HRMS-ESI ( $m/z$ ): calcd for  $\text{C}_{14}\text{H}_{14}\text{ClF}_2\text{O}_2$ ,  $[\text{M}+\text{H}]^+$ : 287.645, found 287.0641.

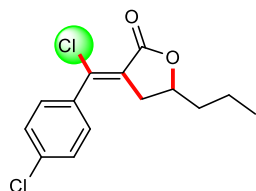

(*Z*)-3-(Chloro(4-chlorophenyl)methylene)-5-propyldihydrofuran-2(3H)-one (**3aq**): Yield: 80% as a yellow oil;  $^1\text{H}$  NMR (400 MHz,  $\text{CDCl}_3$ )  $\delta$  7.49 - 7.42 (m, 4H), 4.53 - 4.36 (m, 1H), 3.11 (dd,  $J = 16.5, 7.2$  Hz, 1H), 2.71 (dd,  $J = 16.5, 6.7$  Hz, 1H), 1.78 - 1.71 (m, 1H), 1.59 - 1.53 (m, 1H), 1.50 - 1.38 (m, 2H), 0.96 (t,  $J = 7.3$  Hz, 3H);  $^{13}\text{C}$  NMR (101 MHz,  $\text{CDCl}_3$ )  $\delta$  167.3, 138.1, 136.3, 136.2, 129.6, 128.9, 123.5, 76.1, 37.9, 37.2, 29.7, 18.2, 13.8 ppm;  $\nu_{\text{max}}(\text{KBr})/\text{cm}^{-1}$  2960, 2926, 2853, 1755, 1632, 1489, 1464; MS (EI)  $m/z$  75, 114, 149, 183, 241, 284; HRMS-ESI ( $m/z$ ): calcd for  $\text{C}_{14}\text{H}_{15}\text{Cl}_2\text{O}_2$ ,  $[\text{M}+\text{H}]^+$ : 285.0444, found 285.0441.

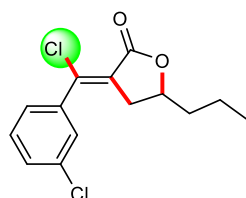

(*Z*)-3-(Chloro(3-chlorophenyl)methylene)-5-propyldihydrofuran-2(3H)-one (**3ar**): Yield: 78% as a black oil;  $^1\text{H}$  NMR (400 MHz,  $\text{CDCl}_3$ )  $\delta$  7.50 (s, 1H), 7.46 - 7.36 (m, 3H), 4.59 - 4.33 (m, 1H),

3.11 (dd,  $J = 16.6, 7.2$  Hz, 1H), 2.71 (dd,  $J = 16.6, 6.6$  Hz, 1H), 1.78 - 1.69 (m, 1H), 1.59 - 1.52 (m, 1H), 1.51 - 1.36 (m, 2H), 0.96 (t,  $J = 7.3$  Hz, 3H);  $^{13}\text{C}$  NMR (101 MHz,  $\text{CDCl}_3$ )  $\delta$  167.2, 139.5, 137.6, 134.7, 130.3, 129.9, 128.2, 126.3, 124.1, 76.1, 38.0, 37.0, 29.7, 18.2, 13.8 ppm; IR (KBr) $_{\text{vmax/cm}^{-1}}$ : 2959, 2925, 2852, 1755, 1631, 1565, 1468; MS (EI)  $m/z$  99, 114, 149, 184, 241, 284; HRMS-ESI ( $m/z$ ): calcd for  $\text{C}_{14}\text{H}_{15}\text{Cl}_2\text{O}_2$ ,  $[\text{M}+\text{H}]^+$ : 285.0444, found 285.0441.

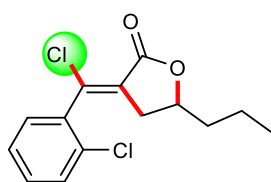

(*Z*)-3-(Chloro(2-chlorophenyl)methylene)-5-propyldihydrofuran-2(3H)-one (**3as**): Yield: 73% as a yellow oil;  $^1\text{H}$  NMR (400 MHz,  $\text{CDCl}_3$ )  $\delta$  7.48 (q,  $J = 3.4, 2.8$  Hz, 1H), 7.41 - 7.30 (m, 3H), 4.60 - 4.16 (m, 1H), 2.83 (ddd,  $J = 54.6, 16.9, 7.3$  Hz, 1H), 2.42 (ddd,  $J = 63.0, 17.0, 5.9$  Hz, 1H), 1.89 - 1.61 (m, 1H), 1.58 - 1.32 (m, 3H), 0.94 (t,  $J = 7.1$  Hz, 3H);  $^{13}\text{C}$  NMR (101 MHz,  $\text{CDCl}_3$ )  $\delta$  166.9, 136.9, 136.0, 131.5, 131.0, 130.2, 129.3, 127.6, 125.9, 76.2, 38.1, 35.4, 18.1, 13.7 ppm; IR (KBr) $_{\text{vmax/cm}^{-1}}$ : 2962, 2934, 2837, 1759, 1654, 1469, 1433; MS (EI)  $m/z$  75, 99, 114, 149, 184, 241, 284; HRMS (ESI,  $m/z$ ):  $[\text{M}+\text{H}]^+$  Calcd. for  $\text{C}_{14}\text{H}_{15}\text{Cl}_2\text{O}_2$ , 285.0444, found 285.0440.

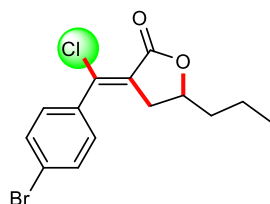

(*Z*)-3-((4-Bromophenyl)chloromethylene)-5-propyldihydrofuran-2(3H)-one (**3at**): Yield: 78% as a yellow solid; mp = 81.2 - 81.6 °C;  $^1\text{H}$  NMR (400 MHz,  $\text{CDCl}_3$ )  $\delta$  7.64 - 7.55 (m, 2H), 7.44 - 7.33 (m, 2H), 4.49 - 4.39 (m, 1H), 3.10 (dd,  $J = 16.5, 7.2$  Hz, 1H), 2.70 (dd,  $J = 16.5, 6.7$  Hz, 1H), 1.78

- 1.69 (m, 1H), 1.61 - 1.53 (m, 1H), 1.53 - 1.38 (m, 2H), 0.96 (t,  $J = 7.3$  Hz, 3H);  $^{13}\text{C}$  NMR (101 MHz,  $\text{CDCl}_3$ )  $\delta$  167.3, 138.1, 136.8, 131.9, 129.7, 124.6, 123.6, 76.1, 38.0, 37.2, 29.7, 18.2, 13.8 ppm; IR (KBr) $_{\text{vmax}}/\text{cm}^{-1}$ : 2958, 2924, 2853, 1752, 1631, 1485, 1460; MS (EI)  $m/z$  97, 123, 164, 192, 220, 263, 328; HRMS (ESI,  $m/z$ ):  $[\text{M}+\text{H}]^+$  Calcd. for  $\text{C}_{14}\text{H}_{15}\text{BrClO}_2$ , 328.9939, found, 328.9935.

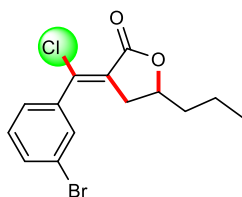

(*Z*)-3-((3-Bromophenyl)chloromethylene)-5-propyldihydrofuran-2(3H)-one (**3au**): Yield: 76% as a yellow oil;  $^1\text{H}$  NMR (400 MHz,  $\text{CDCl}_3$ )  $\delta$  7.65 (t,  $J = 1.8$  Hz, 1H), 7.63 - 7.56 (m, 1H), 7.46 - 7.40 (m, 1H), 7.34 (t,  $J = 7.9$  Hz, 1H), 4.52 - 4.36 (m, 1H), 3.11 (dd,  $J = 16.6, 7.2$  Hz, 1H), 2.71 (dd,  $J = 16.6, 6.6$  Hz, 1H), 1.80 - 1.70 (m, 1H), 1.58 - 1.50 (m, 1H), 1.50 - 1.38 (m, 2H), 0.97 (t,  $J = 7.3$  Hz, 3H);  $^{13}\text{C}$  NMR (101 MHz,  $\text{CDCl}_3$ )  $\delta$  139.7, 137.5, 133.2, 131.2, 130.1, 126.7, 124.1, 122.6, 76.1, 38.0, 37.0, 29.7, 18.2, 13.8 ppm; IR (KBr) $_{\text{vmax}}/\text{cm}^{-1}$ : 2959, 2923, 2852, 1756, 1633, 1559, 1467; MS (EI)  $m/z$  88, 114, 150, 193, 230, 286, 328; HRMS (ESI,  $m/z$ ):  $[\text{M}+\text{H}]^+$  Calcd. for  $\text{C}_{14}\text{H}_{15}\text{BrClO}_2$ , 328.9939, found, 328.9935.

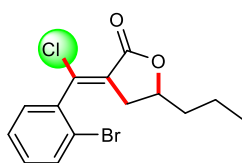

(*Z*)-3-((2-Bromophenyl)chloromethylene)-5-propyldihydrofuran-2(3H)-one (**3av**): Yield: 75% as a yellow oil;  $^1\text{H}$  NMR (400 MHz,  $\text{CDCl}_3$ )  $\delta$  7.67 (d,  $J = 8.0$  Hz, 1H), 7.51 - 7.38 (m, 1H), 7.37 - 7.24 (m, 2H), 4.56 - 4.40 (m, 1H), 2.82 (dd,  $J = 17.0, 7.5$  Hz, 1H), 2.41 (dd,  $J = 17.0, 6.2$  Hz, 1H),

1.78 - 1.66 (m, 1H), 1.62 - 1.52 (m, 1H), 1.52 - 1.34 (m, 2H), 0.95 (t,  $J = 6.8$  Hz, 3H);  $^{13}\text{C}$  NMR (101 MHz,  $\text{CDCl}_3$ )  $\delta$  166.9, 138.9, 137.5, 133.4, 131.0, 129.1, 128.2, 125.6, 120.8, 76.2, 38.1, 35.4, 18.2, 18.1, 13.8 ppm; IR (KBr) $_{\text{vmax/cm}^{-1}}$ : 2960, 2932, 2872, 1759, 1654, 1465, 1431; MS (EI)  $m/z$  88, 115, 149, 193, 249; 287, 328; HRMS (ESI,  $m/z$ ):  $[\text{M}+\text{H}]^+$  Calcd. for  $\text{C}_{14}\text{H}_{15}\text{BrClO}_2$ , 328.9939, found 328.9935.

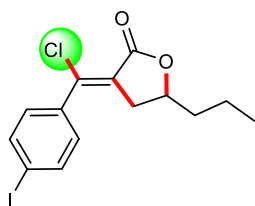

(*Z*)-3-(Chloro(4-iodophenyl)methylene)-5-propyldihydrofuran-2(3H)-one (**3aw**): Yield: 83% as a yellow solid; mp = 85.3 - 85.8 °C;  $^1\text{H}$  NMR (400 MHz,  $\text{CDCl}_3$ )  $\delta$  7.82 - 7.74 (m, 2H), 7.24 (dd,  $J = 8.5, 1.8$  Hz, 2H), 4.60 - 4.30 (m, 1H), 3.23 - 2.99 (m, 1H), 2.87 - 2.60 (m, 1H), 1.81 - 1.65 (m, 1H), 1.61 - 1.50 (m, 1H), 1.50 - 1.33 (m, 2H), 0.94 (q,  $J = 7.1, 6.4$  Hz, 3H);  $^{13}\text{C}$  NMR (101 MHz,  $\text{CDCl}_3$ )  $\delta$  167.3, 138.2, 137.8, 137.3, 137.2, 129.8, 129.8, 123.6, 96.6, 76.1, 76.1, 37.9, 37.9, 37.1, 18.2, 13.8 ppm; IR (KBr) $_{\text{vmax/cm}^{-1}}$ : 2959, 2931, 2871, 1755, 1631, 1580, 1481, 1388; MS (EI)  $m/z$  89, 115, 150, 178, 240; 275, 333, 376; HRMS (ESI,  $m/z$ ):  $[\text{M}+\text{H}]^+$  Calcd. for  $\text{C}_{14}\text{H}_{15}\text{ClIO}_2$ , 376.9800, found 376.9793.

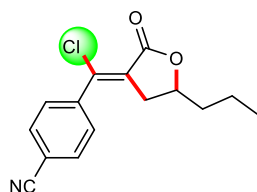

(*Z*)-4-(Chloro(2-oxo-5-propyldihydrofuran-3(2H)-ylidene)methyl)benzonitrile (**3ax**): Yield: 82% as a yellow solid; mp = 132.0 - 132.5 °C;  $^1\text{H}$  NMR (400 MHz,  $\text{CDCl}_3$ )  $\delta$  7.88 - 7.73 (m, 2H), 7.72

- 7.59 (m, 2H), 4.60 - 4.38 (m, 1H), 3.09 (dd,  $J = 16.7, 7.1$  Hz, 1H), 2.70 (dd,  $J = 16.7, 6.6$  Hz, 1H), 1.78 - 1.70 (m, 1H), 1.60 - 1.53 (m, 1H), 1.52 - 1.38 (m, 2H), 0.96 (t,  $J = 7.3$  Hz, 3H);  $^{13}\text{C}$  NMR (101 MHz,  $\text{CDCl}_3$ )  $\delta$  166.8, 142.0, 136.8, 132.5, 128.9, 125.2, 117.9, 113.9, 76.1, 37.9, 37.0, 29.7, 18.2, 13.7 ppm; IR (KBr) $_{\text{vmax/cm}^{-1}}$ : 2960, 2926, 2854, 2230, 1755, 1633, 1502, 1463; MS (EI)  $m/z$  87, 113, 140, 175, 232; 275; HRMS (ESI,  $m/z$ ):  $[\text{M}+\text{H}]^+$  Calcd. for  $\text{C}_{15}\text{H}_{15}\text{ClNO}_2$ , 276.0786, found 276.0782.

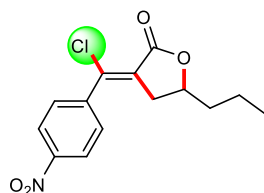

(*Z*)-3-(Chloro(4-nitrophenyl)methylene)-5-propyldihydrofuran-2(3H)-one (**3ay**): Yield: 68% as a yellow solid; mp = 134.2 - 134.8°C;  $^1\text{H}$  NMR (400 MHz,  $\text{CDCl}_3$ )  $\delta$  8.46 - 8.24 (m, 2H), 7.86 - 7.61 (m, 2H), 4.56 - 4.34 (m, 1H), 3.10 (dd,  $J = 16.7, 7.1$  Hz, 1H), 2.72 (dd,  $J = 16.7, 6.6$  Hz, 1H), 1.79 - 1.70 (m, 1H), 1.61 - 1.53 (m, 1H), 1.53 - 1.38 (m, 2H), 0.96 (t,  $J = 7.3$  Hz, 3H);  $^{13}\text{C}$  NMR (101 MHz,  $\text{CDCl}_3$ )  $\delta$  166.7, 148.3, 143.7, 136.4, 129.3, 125.5, 123.9, 76.2, 37.9, 37.0, 18.2, 13.7 ppm; IR (KBr) $_{\text{vmax/cm}^{-1}}$ : 3080, 2957, 2924, 2854, 1752, 1635, 1599, 1462; MS (EI)  $m/z$  88, 115, 150, 178, 195, 252; 295; HRMS (ESI,  $m/z$ ):  $[\text{M}+\text{H}]^+$  Calcd. for  $\text{C}_{14}\text{H}_{15}\text{ClNO}_4$ , 296.0684, found 296.0681.

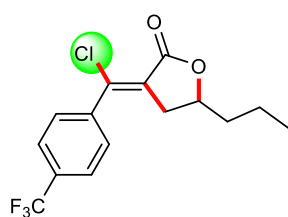

(*Z*)-3-(Chloro(4-(trifluoromethyl)phenyl)methylene)-5-propyldihydrofuran-2(3H)-one (**3az**): Yield:

79% as a yellow solid; mp = 62.4 - 62.9°C; <sup>1</sup>H NMR (400 MHz, CDCl<sub>3</sub>) δ 7.73 (d, *J* = 8.3 Hz, 2H), 7.63 (d, *J* = 8.2 Hz, 2H), 4.60 - 4.35 (m, 1H), 3.10 (dd, *J* = 16.6, 7.2 Hz, 1H), 2.71 (dd, *J* = 16.6, 6.6 Hz, 1H), 1.79 - 1.70 (m, 1H), 1.61 - 1.53 (m, 1H), 1.52 - 1.38 (m, 2H), 0.96 (t, *J* = 7.3 Hz, 3H); <sup>13</sup>C NMR (101 MHz, CDCl<sub>3</sub>) δ 167.0, 141.2, 137.5, 132.1, 131.8, 128.6, 125.7, 125.7, 124.9, 124.6, 76.1, 37.9, 37.0, 18.2, 13.7 ppm; ν<sub>max</sub>(KBr)/cm<sup>-1</sup> 2963, 2933, 2875, 1758, 1636, 1616, 1464; MS (EI) *m/z* 55, 133, 183, 218, 275; 318; HRMS (ESI, *m/z*): [M+H]<sup>+</sup> Calcd. for C<sub>15</sub>H<sub>15</sub>ClF<sub>3</sub>O<sub>2</sub>, 319.0707, found 319.0703.

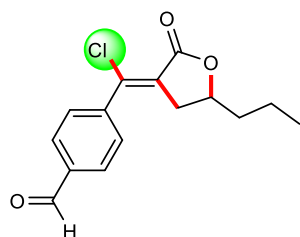

(Z)-4-(Chloro(2-oxo-5-propyldihydrofuran-3(2H)-ylidene)methyl)benzaldehyde (**3ba**): Yield: 81% as a yellow oil; <sup>1</sup>H NMR (400 MHz, CDCl<sub>3</sub>) δ 10.09 (s, 1H), 7.98 (d, *J* = 8.3 Hz, 2H), 7.68 (d, *J* = 8.3 Hz, 2H), 4.63 - 4.24 (m, 1H), 3.11 (dd, *J* = 16.7, 7.1 Hz, 1H), 2.73 (dd, *J* = 16.7, 6.7 Hz, 1H), 1.79 - 1.70 (m, 1H), 1.63 - 1.54 (m, 1H), 1.54 - 1.39 (m, 2H), 0.95 (t, *J* = 7.3 Hz, 3H); <sup>13</sup>C NMR (101 MHz, CDCl<sub>3</sub>) δ 191.2, 167.1, 143.2, 137.6, 137.0, 129.8, 128.9, 124.8, 76.2, 37.9, 37.1, 29.7, 18.2, 13.8 ppm; ν<sub>max</sub>(KBr)/cm<sup>-1</sup> 3060, 2961, 2930, 2872, 1754, 1634, 1605, 1570, 1464; MS (EI) *m/z* 89, 115, 143, 178, 235; 278; HRMS (ESI, *m/z*): [M+H]<sup>+</sup> Calcd. for C<sub>15</sub>H<sub>16</sub>ClO<sub>3</sub>, 279.0783, found 279.0779.



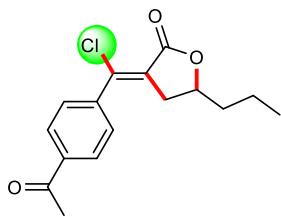

(Z)-3-((4-Acetylphenyl)chloromethylene)-5-propyldihydrofuran-2(3H)-one (**3bb**): Yield: 74% as a yellow oil;  $^1\text{H NMR}$  (400 MHz,  $\text{CDCl}_3$ )  $\delta$  8.04 (d,  $J = 8.3$  Hz, 2H), 7.61 (d,  $J = 8.4$  Hz, 2H), 4.71 - 4.26 (m, 1H), 3.11 (dd,  $J = 16.6, 7.2$  Hz, 1H), 2.72 (dd,  $J = 16.6, 6.6$  Hz, 1H), 2.66 (s, 3H), 1.79 - 1.69 (m, 1H), 1.61 - 1.53 (m, 1H), 1.52 - 1.38 (m, 2H), 1.06 - 0.91 (m, 3H);  $^{13}\text{C NMR}$  (101 MHz,  $\text{CDCl}_3$ )  $\delta$  197.1, 167.1, 142.0, 138.0, 137.9, 128.5, 128.5, 124.4, 76.1, 37.9, 37.1, 29.7, 26.7, 18.2, 13.7 ppm;  $\nu_{\text{max}}(\text{KBr})/\text{cm}^{-1}$  3357, 3058, 2925, 2855, 1755, 1687, 1631, 1563, 1463; MS (EI)  $m/z$  88, 114, 149, 177, 249, 277, 292; HRMS (ESI,  $m/z$ ):  $[\text{M}+\text{H}]^+$  Calcd. for  $\text{C}_{16}\text{H}_{18}\text{ClO}_3$ , 293.0939, found 293.0934.

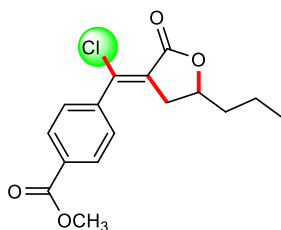

Methyl-(Z)-4-(chloro(2-oxo-5-propyldihydrofuran-3(2H)-ylidene)methyl)benzoate (**3bc**): Yield: 86% as a yellow oil;  $^1\text{H NMR}$  (400 MHz,  $\text{CDCl}_3$ )  $\delta$  8.11 (d,  $J = 7.1$  Hz, 2H), 7.58 (d,  $J = 8.1$  Hz, 2H), 4.43 (p,  $J = 6.7$  Hz, 1H), 4.04 - 3.88 (m, 3H), 3.10 (dd,  $J = 16.6, 7.2$  Hz, 1H), 2.71 (dd,  $J = 16.6, 6.6$  Hz, 1H), 1.77 - 1.67 (m, 1H), 1.57 (tt,  $J = 13.5, 5.5$  Hz, 1H), 1.53 - 1.35 (m, 2H), 0.95 (t,  $J = 7.2$  Hz, 3H);  $^{13}\text{C NMR}$  (101 MHz,  $\text{CDCl}_3$ )  $\delta$  167.2, 166.1, 141.9, 138.0, 131.5, 129.8, 128.2, 124.3, 76.1, 52.5, 37.9, 37.1, 18.2, 13.7 ppm;  $\nu_{\text{max}}(\text{KBr})/\text{cm}^{-1}$  2959, 2874, 1758, 1634, 1609, 1568, 1436; MS (EI)  $m/z$  89, 115, 149, 177, 208, 265; 308; HRMS (ESI,  $m/z$ ):  $[\text{M}+\text{H}]^+$  Calcd. for

C<sub>16</sub>H<sub>18</sub>ClO<sub>4</sub>, 309.0888, found 309.0882.

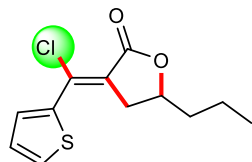

(Z)-3-(Chloro(thiophen-2-yl)methylene)-5-propyldihydrofuran-2(3H)-one (**3bd**): Yield: 71% as a yellow oil; <sup>1</sup>H NMR (400 MHz, CDCl<sub>3</sub>) δ 7.62 (d, *J* = 4.9 Hz, 2H), 7.19 (dd, *J* = 4.9, 4.1 Hz, 1H), 4.63 - 4.46 (m, 1H), 3.41 (dd, *J* = 17.1, 7.7 Hz, 1H), 2.90 (dd, *J* = 17.1, 5.9 Hz, 1H), 1.81 - 1.73 (m, 1H), 1.69 - 1.63 (m, 1H), 1.59 - 1.42 (m, 2H), 0.99 (t, *J* = 7.3 Hz, 3H); <sup>13</sup>C NMR (101 MHz, CDCl<sub>3</sub>) δ 167.9, 140.7, 132.9, 131.6, 130.7, 127.9, 119.1, 75.5, 38.4, 37.8, 18.2, 13.8 ppm; ν<sub>max</sub>(KBr)/cm<sup>-1</sup> 3107, 2959, 2959, 2871, 1748, 1598, 1462; MS (EI) *m/z* 77, 121, 156, 185, 213, 256; HRMS (ESI, *m/z*): [M+H]<sup>+</sup> Calcd. for C<sub>12</sub>H<sub>14</sub>ClO<sub>2</sub>S, 257.0398, found 257.0393.

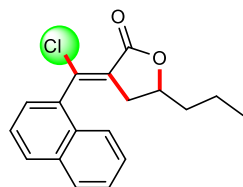

(Z)-3-(Chloro(naphthalen-1-yl)methylene)-5-propyldihydrofuran-2(3H)-one (**3be**): Yield: 77% as a yellow oil; <sup>1</sup>H NMR (400 MHz, CDCl<sub>3</sub>) δ 7.99 - 7.96 (m, 1H), 7.94 - 7.87 (m, 3H), 7.63 - 7.54 (m, 3H), 4.49 - 4.36 (m, 1H), 3.18 (dd, *J* = 16.5, 7.2 Hz, 1H), 2.79 (dd, *J* = 16.5, 6.7 Hz, 1H), 1.80 - 1.70 (m, 1H), 1.62 - 1.52 (m, 1H), 1.52 - 1.35 (m, 2H), 0.95 (t, *J* = 7.2 Hz, 3H); <sup>13</sup>C NMR (101 MHz, CDCl<sub>3</sub>) δ 167.6, 139.5, 135.1, 133.7, 132.5, 128.6, 128.5, 128.3, 127.8, 127.8, 127.1, 124.9, 123.3, 76.1, 38.0, 37.3, 18.2, 13.8 ppm; ν<sub>max</sub>(KBr)/cm<sup>-1</sup> 3057, 2960, 2932, 2872, 1755, 1629, 1504, 1463; MS (EI) *m/z* 83, 165, 179, 200, 257, 300; HRMS (ESI, *m/z*): [M+H]<sup>+</sup> Calcd. for

C<sub>18</sub>H<sub>18</sub>ClO<sub>2</sub>, 301.0990, found 301.0986.

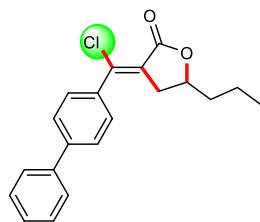

(Z)-3-([1,1'-Biphenyl]-4-ylchloromethylene)-5-propyldihydrofuran-2(3H)-one (**3bf**): Yield: 80% as a yellow solid; mp = 140.0 - 140.5 °C; <sup>1</sup>H NMR (400 MHz, CDCl<sub>3</sub>) δ 7.71 - 7.66 (m, 2H), 7.66 - 7.57 (m, 4H), 7.54 - 7.47 (m, 2H), 7.47 - 7.38 (m, 1H), 4.54 - 4.31 (m, 1H), 3.20 (dd, *J* = 16.5, 7.2 Hz, 1H), 2.80 (dd, *J* = 16.5, 6.7 Hz, 1H), 1.80 - 1.71 (m, 1H), 1.64 - 1.55 (m, 1H), 1.55 - 1.39 (m, 2H), 0.97 (t, *J* = 7.3 Hz, 3H); <sup>13</sup>C NMR (101 MHz, CDCl<sub>3</sub>) δ 167.6, 143.1, 139.8, 139.2, 136.6, 129.0, 128.8, 128.1, 127.2, 122.9, 76.1, 38.0, 37.4, 18.2, 13.8 ppm; ν<sub>max</sub>(KBr)/cm<sup>-1</sup> 2957, 2927, 2870, 1739, 1617, 1485, 1463; MS (EI) *m/z* 95, 152, 165, 191, 226, 283, 326; HRMS (ESI, *m/z*): [M+H]<sup>+</sup> Calcd. for C<sub>20</sub>H<sub>20</sub>ClO<sub>2</sub>, 327.1147, found 327.1141.

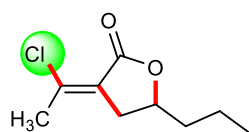

(Z)-3-(1-Chloroethylidene)-5-propyldihydrofuran-2(3H)-one (**3bg**): Yield: 92% as a yellow oil; <sup>1</sup>H NMR (400 MHz, CDCl<sub>3</sub>) δ 4.50 - 4.41 (m, 1H), 3.18 - 3.01 (m, 1H), 2.68 - 2.49 (m, 1H), 2.26 (t, *J* = 1.7 Hz, 3H), 1.77 - 1.65 (m, 1H), 1.63 - 1.52 (m, 1H), 1.52 - 1.38 (m, 2H), 0.96 (d, *J* = 14.5 Hz, 3H); <sup>13</sup>C NMR (101 MHz, CDCl<sub>3</sub>) δ 167.0, 139.5, 121.3, 75.5, 38.4, 34.8, 26.4, 18.2, 13.8 ppm; ν<sub>max</sub>(KBr)/cm<sup>-1</sup> 2961, 2933, 2873, 2859, 1757, 1655, 1436, 1379; MS (EI) *m/z* 67, 88, 93, 109, 137, 145, 188; HRMS (ESI, *m/z*): [M+H]<sup>+</sup> Calcd. for C<sub>9</sub>H<sub>14</sub>ClO<sub>2</sub>, 189.0677, found 189.0676.

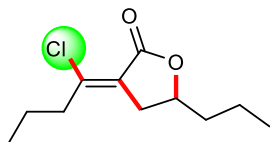

(Z)-3-(1-Chlorobutylidene)-5-propyldihydrofuran-2(3H)-one (**3bh**): Yield: 88% as a yellow oil;  $^1\text{H}$  NMR (400 MHz,  $\text{CDCl}_3$ )  $\delta$  4.52 - 4.36 (m, 1H), 3.10 (dd,  $J = 16.3, 7.8$  Hz, 1H), 2.60 (dd,  $J = 16.3, 6.3$  Hz, 1H), 2.43 (t,  $J = 7.3$  Hz, 2H), 1.84 - 1.65 (m, 4H), 1.63 - 1.54 (m, 1H), 1.52 - 1.44 (m, 1H), 1.15 - 0.65 (m, 6H);  $^{13}\text{C}$  NMR (101 MHz,  $\text{CDCl}_3$ )  $\delta$  167.1, 144.2, 121.2, 75.5, 40.9, 38.3, 34.8, 20.2, 18.2, 13.8, 13.3 ppm;  $\nu_{\text{max}}(\text{KBr})/\text{cm}^{-1}$  2962, 2873, 1758, 1645, 1457, 1348; MS (EI)  $m/z$  81, 91, 109, 129, 145, 173, 216; HRMS (ESI,  $m/z$ ):  $[\text{M}+\text{H}]^+$  Calcd. for  $\text{C}_{11}\text{H}_{18}\text{ClO}_2$ , 217.0990, found 217.0986.

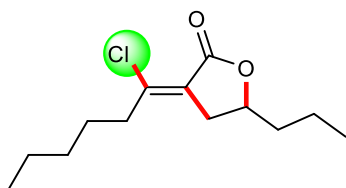

(Z)-3-(1-Chlorohexylidene)-5-propyldihydrofuran-2(3H)-one (**3bi**): Yield: 87% as a yellow oil;  $^1\text{H}$  NMR (400 MHz,  $\text{CDCl}_3$ )  $\delta$  4.49 - 4.40 (m, 1H), 3.23 - 3.00 (m, 1H), 2.59 (dd,  $J = 16.4, 6.3$  Hz, 1H), 2.44 (tt,  $J = 7.5, 1.1$  Hz, 2H), 1.76 - 1.72 (m, 1H), 1.72 - 1.63 (m, 2H), 1.61 - 1.53 (m, 1H), 1.53 - 1.38 (m, 2H), 1.37 - 1.28 (m, 4H), 0.96 (t,  $J = 7.3$  Hz, 3H), 0.91 (t,  $J = 6.9$  Hz, 3H);  $^{13}\text{C}$  NMR (101 MHz,  $\text{CDCl}_3$ )  $\delta$  167.1, 144.5, 120.9, 75.5, 39.1, 38.3, 34.7, 30.9, 26.5, 22.4, 18.2, 13.9, 13.8 ppm;  $\nu_{\text{max}}(\text{KBr})/\text{cm}^{-1}$  2959, 2931, 2869, 1758, 1648, 1462, 1151; MS (EI)  $m/z$  80, 88, 117, 145, 153, 188, 244; HRMS (ESI,  $m/z$ ):  $[\text{M}+\text{H}]^+$  Calcd. for  $\text{C}_{13}\text{H}_{22}\text{ClO}_2$ , 245.1303 found 245.1301.

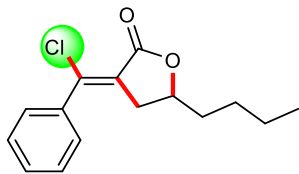

(Z)-5-Butyl-3-(chloro(phenyl)methylene)dihydrofuran-2(3H)-one (**4aa**): Yield: 78% as a yellow oil;  $^1\text{H}$  NMR (400 MHz,  $\text{CDCl}_3$ )  $\delta$  7.54 - 7.49 (m, 2H), 7.48 - 7.41 (m, 3H), 4.47 - 4.30 (m, 1H), 3.12 (dd,  $J = 16.5, 7.2$  Hz, 1H), 2.73 (dd,  $J = 16.6, 6.7$  Hz, 1H), 1.78 - 1.68 (m, 1H), 1.64 - 1.52 (m, 1H), 1.50 - 1.29 (m, 4H), 0.90 (t,  $J = 7.0$  Hz, 3H);  $^{13}\text{C}$  NMR (101 MHz,  $\text{CDCl}_3$ )  $\delta$  167.6, 139.4, 137.8, 130.2, 128.6, 128.1, 123.1, 76.3, 37.2, 35.6, 27.0, 22.4, 13.9 ppm;  $\nu_{\text{max}}(\text{KBr})/\text{cm}^{-1}$  3060, 2958, 2930, 2859, 1757, 1631, 1491, 1465; MS (EI)  $m/z$  89, 115, 150, 179, 207, 264; HRMS (ESI,  $m/z$ ):  $[\text{M}+\text{H}]^+$  Calcd. for  $\text{C}_{15}\text{H}_{18}\text{ClO}_2$ , 265.0990, found 265.0985.

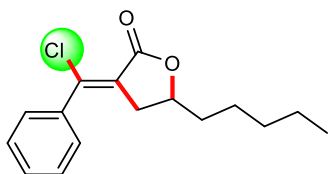

(Z)-3-(chloro(phenyl)methylene)-5-pentyldihydrofuran-2(3H)-one (**4ab**): Yield: 75% as a yellow oil;  $^1\text{H}$  NMR (400 MHz,  $\text{CDCl}_3$ )  $\delta$  7.52 - 7.48 (m, 2H), 7.47 - 7.43 (m, 3H), 4.45 - 4.32 (m, 1H), 3.12 (dd,  $J = 16.5, 7.1$  Hz, 1H), 2.72 (dd,  $J = 16.5, 6.7$  Hz, 1H), 1.78 - 1.69 (m, 1H), 1.64 - 1.52 (m, 1H), 1.42 - 1.23 (m, 6H), 0.89 (t,  $J = 6.7$  Hz, 3H);  $^{13}\text{C}$  NMR (101 MHz,  $\text{CDCl}_3$ )  $\delta$  167.6, 139.4, 137.8, 130.2, 128.6, 128.2, 128.1, 123.1, 76.4, 37.2, 35.9, 31.4, 24.6, 22.5, 14.0 ppm;  $\nu_{\text{max}}(\text{KBr})/\text{cm}^{-1}$  3060, 2930, 2859, 1758, 1631, 1491, 1464; MS (EI)  $m/z$  89, 115, 150, 179, 207, 278; HRMS (ESI,  $m/z$ ):  $[\text{M}+\text{H}]^+$  Calcd. for  $\text{C}_{16}\text{H}_{20}\text{ClO}_2$ , 279.1147, found 279.1142.

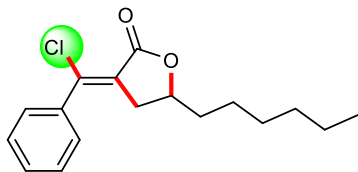

(Z)-3-(Chloro(phenyl)methylene)-5-hexyldihydrofuran-2(3H)-one (**4ac**): Yield: 72% as a yellow oil;  $^1\text{H NMR}$  (400 MHz,  $\text{CDCl}_3$ )  $\delta$  7.53 - 7.48 (m, 2H), 7.48 - 7.43 (m, 3H), 4.44 - 4.35 (m, 1H), 3.12 (dd,  $J = 16.5, 7.1$  Hz, 1H), 2.72 (dd,  $J = 16.5, 6.7$  Hz, 1H), 1.80 - 1.69 (m, 1H), 1.63 - 1.53 (m, 1H), 1.39 - 1.24 (m, 8H), 0.88 (t,  $J = 6.4$  Hz, 3H);  $^{13}\text{C NMR}$  (101 MHz,  $\text{CDCl}_3$ )  $\delta$  167.6, 139.4, 137.9, 130.2, 128.6, 128.1, 123.1, 76.3, 37.2, 35.9, 31.6, 28.9, 24.8, 22.5, 14.0 ppm;  $\nu_{\text{max}}(\text{KBr})/\text{cm}^{-1}$  3060, 2929, 1857, 1759, 1631, 1491, 1464; MS (EI)  $m/z$  95, 115, 150, 179, 207; 292; HRMS (ESI,  $m/z$ ):  $[\text{M}-\text{H}]^+$  Calcd. for  $\text{C}_{17}\text{H}_{22}\text{ClO}_2$ , 293.1303, found 293.1298.

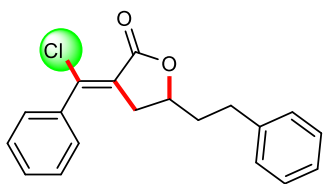

(Z)-3-(Chloro(phenyl)methylene)-5-phenethyldihydrofuran-2(3H)-one (**4ad**): Yield: 78% as a white solid; mp = 112.4 - 112.9 °C;  $^1\text{H NMR}$  (400 MHz,  $\text{CDCl}_3$ )  $\delta$  7.53 - 7.48 (m, 2H), 7.48 - 7.42 (m, 3H), 7.34 - 7.27 (m, 2H), 7.25 - 7.12 (m, 3H), 4.45 - 4.31 (m, 1H), 3.11 (dd,  $J = 16.6, 7.2$  Hz, 1H), 2.93 - 2.79 (m, 1H), 2.79 - 2.69 (m, 2H), 2.12 - 2.01 (m, 1H), 1.98 - 1.84 (m, 1H);  $^{13}\text{C NMR}$  (100 MHz,  $\text{CDCl}_3$ )  $\delta$  167.5, 140.6, 139.7, 137.7, 130.3, 128.6, 128.5, 128.2, 126.3, 122.8, 75.3, 37.6, 37.1, 31.3 ppm;  $\nu_{\text{max}}(\text{KBr})/\text{cm}^{-1}$  3061, 3027, 2927, 2857, 1753, 1630, 1493, 1444; MS (EI)  $m/z$  89, 115, 141, 179, 231, 276; 312; HRMS (ESI,  $m/z$ ):  $[\text{M}+\text{H}]^+$  Calcd. for  $\text{C}_{19}\text{H}_{18}\text{ClO}_2$ , 313.0990, found 313.0984.

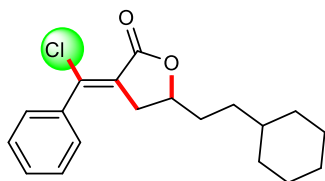

(Z)-3-(Chloro(phenyl)methylene)-5-(2-cyclohexylethyl)dihydrofuran-2(3H)-one (**4ae**): Yield: 81% as a black oil;  $^1\text{H NMR}$  (400 MHz,  $\text{CDCl}_3$ )  $\delta$  7.56 - 7.49 (m, 2H), 7.48 - 7.42 (m, 3H), 4.58 - 4.46 (m, 1H), 3.13 (dd,  $J = 16.4, 7.1$  Hz, 1H), 2.70 (dd,  $J = 16.5, 6.8$  Hz, 1H), 1.82 - 1.60 (m, 8H), 1.45 - 1.33 (m, 1H), 1.31 - 1.06 (m, 4H), 1.04 - 0.82 (m, 2H);  $^{13}\text{C NMR}$  (101 MHz,  $\text{CDCl}_3$ )  $\delta$  167.6, 139.4, 137.9, 130.2, 128.6, 128.2, 123.0, 74.3, 43.9, 37.8, 33.9, 33.7, 32.8, 26.4, 26.1, 26.0;  $\nu_{\text{max}}(\text{KBr})/\text{cm}^{-1}$  3061, 2924, 2851, 1759, 1631, 1491, 1446; MS (EI)  $m/z$  89, 115, 152, 179, 207, 276, 304; HRMS (ESI,  $m/z$ ):  $[\text{M}+\text{H}]^+$  Calcd. for  $\text{C}_{18}\text{H}_{22}\text{ClO}_2$ , 305.1303, found 305.1297.

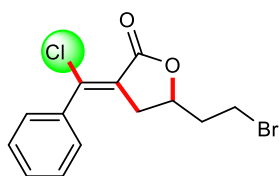

(Z)-5-(2-Bromoethyl)-3-(chloro(phenyl)methylene)dihydrofuran-2(3H)-one (**4af**): Yield: 82% as a yellow oil;  $^1\text{H NMR}$  (400 MHz,  $\text{CDCl}_3$ )  $\delta$  7.53 - 7.48 (m, 2H), 7.48 - 7.43 (m, 3H), 4.70 - 4.60 (m, 1H), 3.58 - 3.47 (m, 2H), 3.22 (dd,  $J = 16.6, 7.4$  Hz, 1H), 2.77 (dd,  $J = 16.6, 6.6$  Hz, 1H), 2.31 - 2.20 (m, 1H), 2.15 - 2.05 (m, 1H);  $^{13}\text{C NMR}$  (101 MHz,  $\text{CDCl}_3$ )  $\delta$  167.0, 140.4, 137.6, 130.4, 128.7, 128.1, 122.1, 73.8, 38.8, 36.7, 28.3 ppm;  $\nu_{\text{max}}(\text{KBr})/\text{cm}^{-1}$  3059, 2928, 2853, 1755, 1630, 1577, 1490, 1442; MS (EI)  $m/z$  89, 115, 150, 179, 207, 260, 314; HRMS (ESI,  $m/z$ ):  $[\text{M}+\text{H}]^+$  Calcd. for  $\text{C}_{13}\text{H}_{13}\text{BrClO}_2$ , 314.97882, found 314.9776.

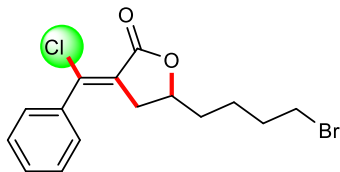

(Z)-5-(4-Bromobutyl)-3-(chloro(phenyl)methylene)dihydrofuran-2(3H)-one (**4ag**): Yield: 79% as a yellow oil;  $^1\text{H NMR}$  (400 MHz,  $\text{CDCl}_3$ )  $\delta$  7.53 - 7.48 (m, 2H), 7.48 - 7.43 (m, 3H), 4.41 (qd,  $J = 7.2, 4.8$  Hz, 1H), 3.41 (t,  $J = 6.6$  Hz, 2H), 3.14 (dd,  $J = 16.5, 7.2$  Hz, 1H), 2.74 (dd,  $J = 16.6, 6.7$  Hz, 1H), 1.90 (p,  $J = 6.9$  Hz, 2H), 1.81 - 1.71 (m, 1H), 1.69 - 1.50 (m, 3H);  $^{13}\text{C NMR}$  (101 MHz,  $\text{CDCl}_3$ )  $\delta$  167.4, 139.7, 137.8, 130.3, 128.6, 128.1, 122.7, 75.9, 37.1, 35.0, 33.3, 32.2, 23.7 ppm;  $\nu_{\text{max}}(\text{KBr})/\text{cm}^{-1}$  3059, 2938, 2864, 1750, 1631, 1577, 1491, 1440; MS (EI)  $m/z$  89, 115, 150, 179, 207, 262, 342; HRMS (ESI,  $m/z$ ):  $[\text{M}+\text{H}]^+$  Calcd. for  $\text{C}_{15}\text{H}_{17}\text{BrClO}_2$ , 343.0095, found 343.0090.

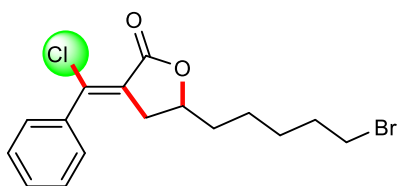

(Z)-5-(5-Bromopentyl)-3-(chloro(phenyl)methylene)dihydrofuran-2(3H)-one (**4ah**): Yield: 81% as a yellow oil;  $^1\text{H NMR}$  (400 MHz,  $\text{CDCl}_3$ )  $\delta$  7.65 - 7.39 (m, 2H), 4.63 - 4.09 (m, 3H), 3.40 (t,  $J = 6.7$  Hz, 1H), 3.13 (dd,  $J = 16.6, 7.2$  Hz, 2H), 2.73 (dd,  $J = 16.6, 6.7$  Hz, 1H), 1.93 - 1.82 (m, 1H), 1.81 - 1.68 (m, 2H), 1.68 - 1.56 (m, 1H), 1.56 - 1.36 (m, 4H);  $^{13}\text{C NMR}$  (101 MHz,  $\text{CDCl}_3$ )  $\delta$  167.5, 139.6, 137.8, 128.6, 128.1, 122.9, 76.1, 37.2, 35.7, 33.7, 32.5, 27.8, 24.2 ppm;  $\nu_{\text{max}}(\text{KBr})/\text{cm}^{-1}$  3059, 2935, 2860, 1748, 1631, 1577, 1491, 1441; MS (EI)  $m/z$  89, 115, 150, 179, 207, 277, 356; HRMS (ESI,  $m/z$ ):  $[\text{M}+\text{H}]^+$  Calcd. for  $\text{C}_{16}\text{H}_{19}\text{BrClO}_2$ , 357.0252, found 357.0246.



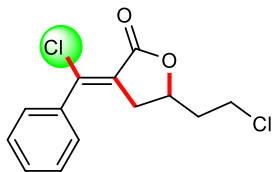

(Z)-3-(Chloro(phenyl)methylene)-5-(2-chloroethyl)dihydrofuran-2(3H)-one (**4ai**): Yield: 78% as a yellow oil;  $^1\text{H NMR}$  (400 MHz,  $\text{CDCl}_3$ )  $\delta$  7.52 - 7.48 (m, 2H), 7.48 - 7.44 (m, 3H), 4.74 - 4.58 (m, 1H), 3.82 - 3.57 (m, 2H), 3.22 (dd,  $J = 16.6, 7.3$  Hz, 1H), 2.78 (dd,  $J = 16.6, 6.7$  Hz, 1H), 2.24 - 2.11 (m, 1H), 2.08 - 1.94 (m, 1H);  $^{13}\text{C NMR}$  (101 MHz,  $\text{CDCl}_3$ )  $\delta$  167.0, 140.4, 137.6, 130.4, 128.6, 128.1, 122.1, 72.9, 40.4, 38.7, 36.8 ppm;  $\nu_{\text{max}}(\text{KBr})/\text{cm}^{-1}$  3060, 2960, 2964, 2927, 1760, 1631, 1491; MS (EI)  $m/z$  89, 115, 150, 207, 233, 269; HRMS (ESI,  $m/z$ ):  $[\text{M}+\text{H}]^+$  Calcd. for  $\text{C}_{13}\text{H}_{13}\text{Cl}_2\text{O}_2$ , 270.0287, found 270.0284.

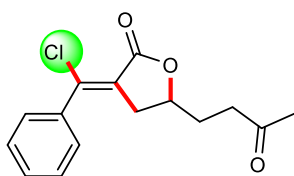

(Z)-3-(Chloro(phenyl)methylene)-5-(3-oxobutyl)dihydrofuran-2(3H)-one (**4aj**): Yield: 80% as a yellow oil;  $^1\text{H NMR}$  (400 MHz,  $\text{CDCl}_3$ )  $\delta$  7.51 - 7.47 (m, 2H), 7.46 - 7.42 (m, 3H), 4.52 - 4.33 (m, 1H), 3.29 - 3.04 (m, 1H), 2.72 (dd,  $J = 16.6, 6.4$  Hz, 1H), 2.66 (t,  $J = 7.0$  Hz, 2H), 2.16 (d,  $J = 1.9$  Hz, 3H), 2.03 - 1.92 (m, 1H), 1.86 - 1.75 (m, 1H);  $^{13}\text{C NMR}$  (101 MHz,  $\text{CDCl}_3$ )  $\delta$  207.3, 167.3, 139.9, 137.7, 130.3, 128.6, 128.1, 122.5, 75.2, 38.8, 37.1, 30.0, 29.7 ppm;  $\nu_{\text{max}}(\text{KBr})/\text{cm}^{-1}$  3061, 2925, 2853, 1754, 1709, 1631, 1491, 1441; MS (EI)  $m/z$  89, 115, 155, 181, 217, 260, 278; HRMS (ESI,  $m/z$ ):  $[\text{M}+\text{H}]^+$  Calcd. for  $\text{C}_{15}\text{H}_{16}\text{ClO}_3$ , 279.0779, found 279.0778.

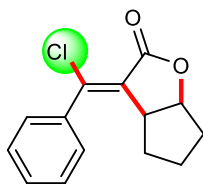

(*Z*)-3-(Chloro(phenyl)methylene)hexahydro-2H-cyclopenta[b]furan-2-one (**4ak**): Yield: 73% as a yellow oil;  $^1\text{H}$  NMR (400 MHz,  $\text{CDCl}_3$ )  $\delta$  7.54 - 7.41 (m, 5H), 4.86 (dd,  $J = 7.6, 3.3$  Hz, 1H), 3.61 - 3.42 (m, 1H), 2.15 - 2.01 (m, 1H), 1.83 - 1.59 (m, 5H);  $^{13}\text{C}$  NMR (101 MHz,  $\text{CDCl}_3$ )  $\delta$  168.0, 140.5, 138.2, 129.9, 128.7, 128.7, 127.9, 82.0, 45.5, 34.0, 33.6, 23.5 ppm;  $\nu_{\text{max}}(\text{KBr})/\text{cm}^{-1}$  3067, 2962, 2869, 1754, 1628, 1459; MS (EI)  $m/z$  89, 115, 155, 181, 217, 260, 248; HRMS (ESI,  $m/z$ ):  $[\text{M}+\text{H}]^+$  Calcd. for  $\text{C}_{14}\text{H}_{14}\text{ClO}_2$ , 249.0681, found 249.0672.

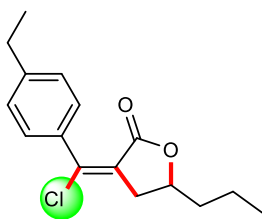

(*E*)-3-(Chloro(4-ethylphenyl)methylene)-5-propyldihydrofuran-2(3H)-one (**5aa**): Yield: 78% as a yellow oil;  $^1\text{H}$  NMR (400 MHz,  $\text{CDCl}_3$ )  $\delta$  7.41 (d,  $J = 8.3$  Hz, 2H), 7.21 (d,  $J = 8.3$  Hz, 2H), 4.55 (tt,  $J = 7.5, 5.8$  Hz, 1H), 3.31 (dd,  $J = 17.9, 7.8$  Hz, 1H), 2.82 (dd,  $J = 17.8, 6.1$  Hz, 1H), 2.68 (q,  $J = 7.6$  Hz, 2H), 1.84 - 1.73 (m, 1H), 1.69 - 1.61 (m, 1H), 1.55 - 1.40 (m, 2H), 1.25 (t,  $J = 7.6$  Hz, 3H), 0.98 (t,  $J = 7.3$  Hz, 3H);  $^{13}\text{C}$  NMR (100 MHz,  $\text{CDCl}_3$ )  $\delta$  166.2, 146.7, 145.9, 132.5, 129.2, 127.4, 123.6, 75.9, 38.5, 37.2, 28.8, 18.2, 15.1, 13.8 ppm;  $\nu_{\text{max}}(\text{KBr})/\text{cm}^{-1}$  2963, 2931, 2872, 1756, 1639, 1507, 1459; MS (EI)  $m/z$  77, 115, 143, 178, 235, 278; HRMS (ESI,  $m/z$ ):  $[\text{M}+\text{H}]^+$  Calcd. for  $\text{C}_{16}\text{H}_{20}\text{ClO}_2$ , 279.1147, found 279.1145.

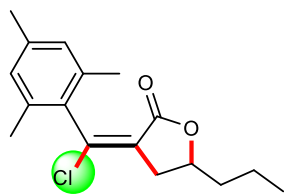

(*E*)-3-(Chloro(mesityl)methylene)-5-propyldihydrofuran-2(3H)-one (**5ab**): Yield: 73% as a yellow solid; mp = 65.0 - 65.4 °C;  $^1\text{H}$  NMR (400 MHz,  $\text{CDCl}_3$ )  $\delta$  6.91 (s, 2H), 4.71 - 4.49 (m, 1H), 3.35 (dd,  $J = 17.8, 7.9$  Hz, 1H), 2.86 (dd,  $J = 17.8, 5.7$  Hz, 1H), 2.31 (s, 2H), 2.23 (s, 6H), 1.84 - 1.73 (m, 1H), 1.73 - 1.64 (m, 1H), 1.56 - 1.43 (m, 2H), 1.01 (t,  $J = 7.3$  Hz, 3H);  $^{13}\text{C}$  NMR (101 MHz,  $\text{CDCl}_3$ )  $\delta$  165.7, 144.7, 139.1, 135.1, 135.1, 132.8, 128.5, 128.4, 126.4, 76.0, 38.6, 35.6, 29.7, 21.3, 19.4, 19.3, 18.0, 13.8 ppm;  $\nu_{\text{max}}(\text{KBr})/\text{cm}^{-1}$  2925, 2863, 1760, 1661, 1610, 1453; MS (EI)  $m/z$  77, 91, 143, 157, 222, 257, 292; HRMS (ESI,  $m/z$ ):  $[\text{M}+\text{H}]^+$  Calcd. for  $\text{C}_{17}\text{H}_{22}\text{ClO}_2$ , 293.1303, found 293.1298.

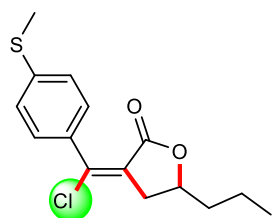

(*E*)-3-(Chloro(4-(methylthio)phenyl)methylene)-5-propyldihydrofuran-2(3H)-one (**5ac**): Yield: 70% as a yellow oil;  $^1\text{H}$  NMR (400 MHz,  $\text{CDCl}_3$ )  $\delta$  7.44 (d,  $J = 8.5$  Hz, 2H), 7.24 (d,  $J = 8.5$  Hz, 2H), 4.65 - 4.50 (m, 1H), 3.34 (dd,  $J = 17.9, 7.8$  Hz, 1H), 2.84 (dd,  $J = 17.9, 6.1$  Hz, 1H), 2.52 (s, 3H), 1.84 - 1.77 (m, 1H), 1.72 - 1.65 (m, 1H), 1.56 - 1.43 (m, 2H), 1.01 (t,  $J = 7.3$  Hz, 3H);  $^{13}\text{C}$  NMR (101 MHz,  $\text{CDCl}_3$ )  $\delta$  145.2, 142.0, 131.3, 129.7, 124.9, 123.7, 75.9, 38.5, 37.2, 29.7, 18.2, 15.1, 13.8 ppm;  $\nu_{\text{max}}(\text{KBr})/\text{cm}^{-1}$  3356, 3206, 2921, 2852, 1750, 1636, 1589, 1461; MS (EI)  $m/z$  80, 115, 146, 161, 196, 253, 296; HRMS (ESI,  $m/z$ ):  $[\text{M}+\text{H}]^+$  Calcd. for  $\text{C}_{15}\text{H}_{18}\text{ClO}_2\text{S}$ , 297.0711, found 297.0708.

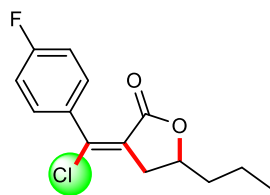

(*E*)-3-(Chloro(4-fluorophenyl)methylene)-5-propyldihydrofuran-2(3H)-one (**5ad**): Yield: 73% as a yellow solid; mp = 46.1 - 46.7°C; <sup>1</sup>H NMR (400 MHz, CDCl<sub>3</sub>) δ 7.55 - 7.45 (m, 2H), 7.14 - 7.04 (m, 2H), 4.59 (tt, *J* = 7.5, 5.9 Hz, 1H), 3.34 (dd, *J* = 18.0, 7.8 Hz, 1H), 2.84 (dd, *J* = 18.0, 6.0 Hz, 1H), 1.87 - 1.73 (m, 1H), 1.74 - 1.62 (m, 1H), 1.61 - 1.41 (m, 2H), 1.01 (t, 3H); <sup>13</sup>C NMR (101 MHz, CDCl<sub>3</sub>) δ 166.0, 163.6 (d, *J* = 251.0 Hz), 144.2, 131.4(d, *J* = 8.7 Hz), 131.2(d, *J* = 3.4 Hz), 124.5, 115.1 (d, *J* = 22.1 Hz), 76.0, 38.5, 37.0, 18.2, 13.8 ppm; ν<sub>max</sub>(KBr)/cm<sup>-1</sup> 3490, 2959, 2931, 1753, 1642, 1504, 1460; MS (EI) *m/z* 83, 107, 133, 168, 197, 225, 268; HRMS (ESI, *m/z*): [M+H]<sup>+</sup> Calcd. for C<sub>14</sub>H<sub>15</sub>ClFO<sub>2</sub>, 269.0739, found 269.0736.

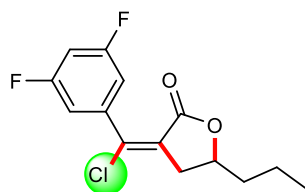

(*E*)-3-(Chloro(3,5-difluorophenyl)methylene)-5-propyldihydrofuran-2(3H)-one (**5ae**): Yield: 64% as a yellow solid; mp = 98.4 - 98.9 °C; <sup>1</sup>H NMR (400 MHz, CDCl<sub>3</sub>) δ 7.05 - 6.97 (m, 2H), 6.92 - 6.84 (m, 1H), 4.61 (tt, *J* = 7.5, 5.9 Hz, 1H), 3.34 (dd, *J* = 18.2, 7.8 Hz, 1H), 2.84 (dd, *J* = 18.2, 6.0 Hz, 1H), 1.85 - 1.74 (m, 1H), 1.72 - 1.64 (m, 1H), 1.56 - 1.42 (m, 2H), 1.02 (t, *J* = 7.3 Hz, 3H); <sup>13</sup>C NMR (101 MHz, CDCl<sub>3</sub>) δ 166.9, 164.0 (d, *J* = 12.8 Hz), 161.5 (d, *J* = 12.7 Hz), 140.6 (t, *J* = 9.7 Hz), 136.3, 124.8, 111.6 (d, *J* = 7.9 Hz), 111.4 (d, *J* = 7.9 Hz), 105.7 (t, *J* = 25.2 Hz), 105.4, 76.1, 37.9, 37.0, 18.2, 13.7 ppm; ν<sub>max</sub>(KBr)/cm<sup>-1</sup> 2960, 2923, 1749, 1665, 1590, 1431; MS (EI) *m/z* 75, 151, 186, 214, 243, 286; HRMS (ESI, *m/z*): [M+H]<sup>+</sup> Calcd. for C<sub>14</sub>H<sub>14</sub>ClFO<sub>2</sub>, 287.0645, found 287.0642.

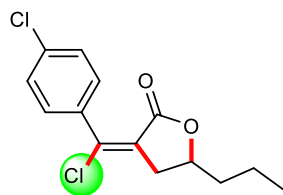

(*E*)-3-(Chloro(4-chlorophenyl)methylene)-5-propyldihydrofuran-2(3H)-one (**5af**): Yield: 77% as a yellow oil;  $^1\text{H}$  NMR (400 MHz,  $\text{CDCl}_3$ )  $\delta$  7.45 (d,  $J = 2.2$  Hz, 3H), 7.28 (s, 1H), 4.47 - 4.37 (m, 1H), 3.10 (dd,  $J = 16.5, 7.2$  Hz, 1H), 2.71 (dd,  $J = 16.5, 6.7$  Hz, 1H), 1.81 - 1.69 (m, 1H), 1.57 - 1.53 (m, 1H), 1.51 - 1.39 (m, 2H), 0.96 (t,  $J = 7.3$  Hz, 3H);  $^{13}\text{C}$  NMR (101 MHz,  $\text{CDCl}_3$ )  $\delta$  167.25, 138.10, 136.29, 136.23, 129.54, 128.88, 123.52, 76.01, 37.94, 37.15, 29.71, 18.19, 13.73 ppm;  $\nu_{\text{max}}(\text{KBr})/\text{cm}^{-1}$  3395, 2925, 2860, 1755, 1633, 1485, 1459; MS (EI)  $m/z$  75, 114, 149, 183, 241, 284; HRMS (ESI,  $m/z$ ):  $[\text{M}+\text{H}]^+$  Calcd. for  $\text{C}_{14}\text{H}_{15}\text{Cl}_2\text{O}_2$ , 285.0444, found 285.0439.

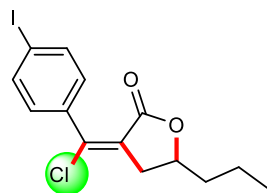

(*E*)-3-(chloro(4-iodophenyl)methylene)-5-propyldihydrofuran-2(3H)-one (**5ag**): Yield: 80% as a yellow solid; mp = 98.0 - 18.6 °C;  $^1\text{H}$  NMR (400 MHz,  $\text{CDCl}_3$ )  $\delta$  7.83 - 7.69 (m, 1H), 7.27 - 7.16 (m, 1H), 4.66 - 4.49 (m, 1H), 3.32 (dd,  $J = 18.0, 7.8$  Hz, 1H), 2.82 (dd,  $J = 18.1, 6.0$  Hz, 1H), 1.85 - 1.73 (m, 1H), 1.72 - 1.63 (m, 0H), 1.57 - 1.44 (m, 1H), 1.01 (t,  $J = 7.3$  Hz, 2H);  $^{13}\text{C}$  NMR (101 MHz,  $\text{CDCl}_3$ )  $\delta$  165.9, 144.1, 137.1, 134.6, 130.8, 124.9, 96.8, 76.1, 38.5, 37.0, 18.1, 13.8 ppm;  $\nu_{\text{max}}(\text{KBr})/\text{cm}^{-1}$  2959, 2865, 1755, 1643, 1581, 1472; MS (EI)  $m/z$  89, 115, 150, 178, 240; 275, 333, 376; HRMS (ESI,  $m/z$ ):  $[\text{M}+\text{H}]^+$  Calcd. for  $\text{C}_{14}\text{H}_{14}\text{ClIO}_2$ , 376.9800, found 376.9794.

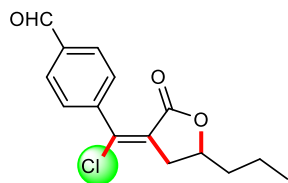

(*E*)-4-(Chloro(2-oxo-5-propyldihydrofuran-3(2H)-ylidene)methyl)benzaldehyde (**5ah**): Yield: 73% as a yellow oil;  $^1\text{H}$  NMR (400 MHz,  $\text{CDCl}_3$ )  $\delta$  10.07 (s, 1H), 7.93 (d,  $J = 8.1$  Hz, 2H), 7.65 (d,  $J = 8.2$  Hz, 2H), 4.62 (tt,  $J = 7.6, 5.8$  Hz, 1H), 3.37 (dd,  $J = 18.2, 7.8$  Hz, 1H), 2.87 (dd,  $J = 18.2, 6.0$  Hz, 1H), 1.85 - 1.78 (m, 1H), 1.73 - 1.67 (m, 1H), 1.56 - 1.45 (m, 2H), 1.02 (t,  $J = 7.3$  Hz, 3H);  $^{13}\text{C}$  NMR (101 MHz,  $\text{CDCl}_3$ )  $\delta$  191.2, 167.1, 143.2, 137.6, 137.0, 129.8, 128.9, 124.8, 76.2, 37.9, 37.1, 18.2, 13.8 ppm;  $\nu_{\text{max}}(\text{KBr})/\text{cm}^{-1}$  3066, 2859, 1752, 1634, 1507, 1456; MS (EI)  $m/z$  89, 115, 143, 178, 235; 278; HRMS (ESI,  $m/z$ ):  $[\text{M}+\text{H}]^+$  Calcd. for  $\text{C}_{15}\text{H}_{16}\text{ClO}_3$ , 279.0783, found 279.0778.

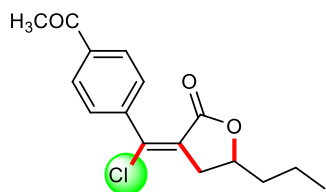

(*E*)-3-((4-Acetylphenyl)chloromethylene)-5-propyldihydrofuran-2(3H)-one (**5ai**): Yield: 70% as a yellow solid; mp = 99.7 - 101.1 °C;  $^1\text{H}$  NMR (400 MHz,  $\text{CDCl}_3$ )  $\delta$  8.04 (d,  $J = 8.4$  Hz, 2H), 7.61 (d,  $J = 8.5$  Hz, 2H), 4.51 - 4.38 (m, 1H), 3.11 (dd,  $J = 16.6, 7.2$  Hz, 1H), 2.75 - 2.70 (m, 1H), 2.66 (s, 3H), 1.80 - 1.72 (m, 1H), 1.58 - 1.53 (m, 1H), 1.51 - 1.39 (m, 2H), 0.96 (t,  $J = 7.3$  Hz, 3H);  $^{13}\text{C}$  NMR (101 MHz,  $\text{CDCl}_3$ )  $\delta$  197.1, 167.1, 142.0, 138.0, 138.0, 128.5, 128.5, 124.39, 76.1, 37.9, 37.1, 29.7, 26.7, 18.2, 13.7 ppm;  $\nu_{\text{max}}(\text{KBr})/\text{cm}^{-1}$  3343, 2923, 2858, 1755, 1722, 1686, 1458; MS (EI)  $m/z$  88, 114, 149, 177, 249, 277, 292; HRMS (ESI,  $m/z$ ):  $[\text{M}+\text{H}]^+$  Calcd. for  $\text{C}_{16}\text{H}_{18}\text{ClO}_3$ , 293.0939, found 293.0935.

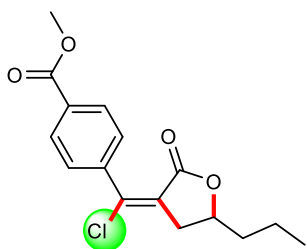

Methyl-(*E*)-4-(chloro(2-oxo-5-propyldihydrofuran-3(2H)-ylidene)methyl)benzoate (**5aj**): Yield: 72% as a yellow solid; mp = 103.0 - 103.6 °C; <sup>1</sup>H NMR (400 MHz, CDCl<sub>3</sub>) δ 8.12 - 8.04 (m, 2H), 7.62 - 7.52 (m, 2H), 4.61 (tt, *J* = 7.5, 5.9 Hz, 1H), 3.95 (s, 3H), 3.36 (dd, *J* = 18.1, 7.8 Hz, 1H), 2.86 (dd, *J* = 18.1, 6.0 Hz, 1H), 1.85 - 1.78 (m, 1H), 1.73 - 1.65 (m, 1H), 1.56 - 1.46 (m, 2H), 1.01 (t, *J* = 7.3 Hz, 3H); <sup>13</sup>C NMR (101 MHz, CDCl<sub>3</sub>) δ 166.4, 165.8, 143.7, 139.5, 131.4, 129.2, 125.6, 76.1, 52.3, 38.5, 36.9, 29.7, 18.2, 13.8 ppm; ν<sub>max</sub>(KBr)/cm<sup>-1</sup> 3357, 2957, 2923, 1755, 1722, 1460, 1433; MS (EI) *m/z* 88, 115, 149, 177, 208, 265, 308; HRMS (ESI, *m/z*): [M+H]<sup>+</sup> Calcd. for C<sub>16</sub>H<sub>18</sub>ClO<sub>4</sub>, 309.0888, found 309.0885.

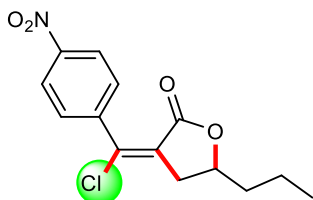

(*E*)-3-(Chloro(4-nitrophenyl)methylene)-5-propyldihydrofuran-2(3H)-one (**5ak**): Yield: 64% as a yellow solid; mp = 129.0 - 129.5 °C; <sup>1</sup>H NMR (400 MHz, CDCl<sub>3</sub>) δ 8.38 - 8.28 (m, 2H), 7.76 - 7.66 (m, 2H), 4.55 - 4.38 (m, 1H), 3.10 (dd, *J* = 16.7, 7.2 Hz, 1H), 2.71 (dd, *J* = 16.7, 6.6 Hz, 1H), 1.82 - 1.69 (m, 1H), 1.53 - 1.48 (m, 1H), 1.48 - 1.39 (m, 2H), 0.97 (t, *J* = 7.3 Hz, 3H); <sup>13</sup>C NMR (101 MHz, CDCl<sub>3</sub>) δ 166.7, 148.3, 143.7, 136.4, 129.3, 125.5, 123.9, 76.2, 37.9, 37.0, 18.2, 13.7 ppm; ν<sub>max</sub>(KBr)/cm<sup>-1</sup> 3357, 2957, 2923, 1755, 1722, 1460, 1433; MS (EI) *m/z* 88, 115, 150, 178, 195, 252; 295; HRMS (ESI, *m/z*): [M+H]<sup>+</sup> Calcd. for C<sub>14</sub>H<sub>15</sub>ClNO<sub>4</sub>, 296.0684, found 296.0680.

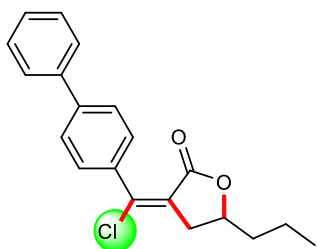

(*E*)-3-([1,1'-Biphenyl]-4-ylchloromethylene)-5-propyldihydrofuran-2(3H)-one (**5al**): Yield: 81% as a yellow solid; mp = 91.1 - 91.6 °C; <sup>1</sup>H NMR (400 MHz, CDCl<sub>3</sub>) δ 7.67 - 7.56 (m, 6H), 7.51 - 7.44 (m, 2H), 7.42 - 7.35 (m, 1H), 4.61 (tt, *J* = 7.6, 5.8 Hz, 1H), 3.38 (dd, *J* = 18.0, 7.8 Hz, 1H), 2.88 (dd, *J* = 17.9, 6.1 Hz, 1H), 1.86 - 1.78 (m, 1H), 1.75 - 1.65 (m, 1H), 1.59 - 1.44 (m, 2H), 1.03 (t, *J* = 7.3 Hz, 3H); <sup>13</sup>C NMR (101 MHz, CDCl<sub>3</sub>) δ 166.1, 145.3, 143.0, 140.3, 134.0, 129.8, 128.8, 127.8, 127.3, 126.6, 124.2, 76.0, 38.5, 37.2, 18.2 13.8 ppm; ν<sub>max</sub>(KBr)/cm<sup>-1</sup> 3032, 2960, 2932, 1755, 1637, 1605, 1460; MS (EI) *m/z* 95, 152, 165, 191, 226, 283, 326; HRMS (ESI, *m/z*): [M+H]<sup>+</sup> Calcd. for C<sub>20</sub>H<sub>20</sub>ClO<sub>2</sub>, 327.1147, found 327.1143.

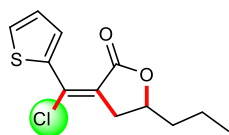

(*E*)-3-(Chloro(thiophen-2-yl)methylene)-5-propyldihydrofuran-2(3H)-one (**5am**): Yield: 74% as a yellow solid; mp = 49.7 - 50.3°C; <sup>1</sup>H NMR (400 MHz, CDCl<sub>3</sub>) δ 7.95 - 7.90 (m, 1H), 7.53 (dd, *J* = 5.1, 1.1 Hz, 1H), 7.09 (dd, *J* = 5.1, 3.9 Hz, 1H), 4.58 (tt, *J* = 7.6, 5.8 Hz, 1H), 3.38 (dd, *J* = 18.2, 7.8 Hz, 1H), 2.89 (dd, *J* = 18.2, 6.1 Hz, 1H), 1.84 - 1.75 (m, 1H), 1.71 - 1.64 (m, 1H), 1.57 - 1.43 (m, 2H), 1.02 (d, *J* = 7.4 Hz, 3H); <sup>13</sup>C NMR (101 MHz, CDCl<sub>3</sub>) δ 166.2, 138.1, 136.9, 132.9, 130.5, 127.2, 122.4, 76.0, 38.5, 38.4, 18.2, 13.8 ppm; ν<sub>max</sub>(KBr)/cm<sup>-1</sup> 3007, 2958, 2925, 1744, 1596, 1460, 1416; MS (EI) *m/z* 97, 111, 121, 135, 165, 198, 221, 240, 256; HRMS (ESI, *m/z*): [M+H]<sup>+</sup> Calcd. for C<sub>12</sub>H<sub>14</sub>ClO<sub>2</sub>S, 257.0399, found 257.0396.



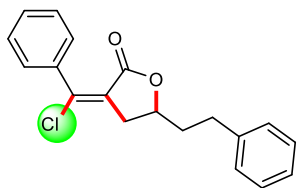

(*E*)-3-(Chloro(phenyl)methylene)-5-phenethyldihydrofuran-2(3H)-one (**5an**): Yield: 82% as a yellow oil;  $^1\text{H NMR}$  (400 MHz,  $\text{CDCl}_3$ )  $\delta$  7.53 - 7.49 (m, 2H), 7.46 - 7.39 (m, 3H), 7.38 - 7.32 (m, 2H), 7.29 - 7.22 (m, 3H), 4.72 - 4.43 (m, 1H), 3.35 (dd,  $J = 17.9, 7.8$  Hz, 1H), 3.05 - 2.68 (m, 3H), 2.28 - 2.09 (m, 1H), 2.08 - 1.97 (m, 1H);  $^{13}\text{C NMR}$  (101 MHz,  $\text{CDCl}_3$ )  $\delta$  165.9, 145.7, 140.6, 135.2, 130.3, 129.1, 128.6, 128.5, 127.9, 126.3, 124.0, 75.1, 38.2, 37.0, 31.3 ppm;  $\nu_{\text{max}}(\text{KBr})/\text{cm}^{-1}$  3026, 2924, 2855, 1754, 1644, 1492, 1446; MS (EI)  $m/z$  89, 114, 141, 179, 231, 276, 312; HRMS (ESI,  $m/z$ ):  $[\text{M}+\text{H}]^+$  Calcd. for  $\text{C}_{19}\text{H}_{18}\text{ClO}_2$ , 313.0990, found 313.0986.

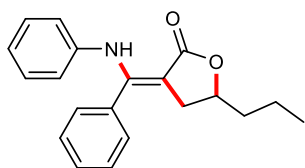

(*Z*)-3-(Phenyl(phenylamino)methylene)-5-propyldihydrofuran-2(3H)-one (**6**): Yield: 82% as a yellow oil;  $^1\text{H NMR}$  (400 MHz,  $\text{CDCl}_3$ )  $\delta$  10.09 (s, 1H), 7.40 - 7.35 (m, 3H), 7.34 - 7.29 (m, 2H), 7.06 (t,  $J = 7.8$  Hz, 2H), 6.89 (t,  $J = 7.3$  Hz, 1H), 6.62 (d,  $J = 8.0$  Hz, 2H), 4.50 (p,  $J = 7.2$  Hz, 1H), 2.91 (dd,  $J = 15.1, 8.2$  Hz, 1H), 2.47 (dd,  $J = 15.1, 6.7$  Hz, 1H), 1.85 - 1.69 (m, 1H), 1.62 - 1.52 (m, 1H), 1.52 - 1.35 (m, 2H), 0.96 (t,  $J = 7.2$  Hz, 3H);  $^{13}\text{C NMR}$  (101 MHz,  $\text{CDCl}_3$ )  $\delta$  173.8, 153.6, 140.2, 134.7, 129.2, 128.8, 128.6, 128.5, 122.8, 121.8, 93.7, 77.6, 38.5, 33.1, 18.3, 13.9 ppm;  $\nu_{\text{max}}(\text{KBr})/\text{cm}^{-1}$  3276, 3055, 2958, 2928, 1765, 1691, 1627, 1596, 1498; MS (EI)  $m/z$  77, 115, 130, 180, 206, 237, 307; HRMS (ESI,  $m/z$ ):  $[\text{M}+\text{H}]^+$  Calcd. for  $\text{C}_{20}\text{H}_{22}\text{NO}_2$ , 308.1645, found 308.1640.

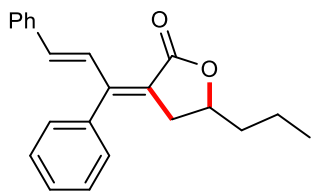

(*Z*)-3-((*E*)-1,3-Diphenylallylidene)-5-propyldihydrofuran-2(3H)-one (**7**): Yield: 87% as a yellow solid; mp = 145.3 - 146.0 °C; <sup>1</sup>H NMR (400 MHz, CDCl<sub>3</sub>) δ 8.76 (d, *J* = 16.1 Hz, 1H), 7.53 - 7.40 (m, 5H), 7.35 - 7.20 (m, 5H), 6.35 (d, *J* = 16.1 Hz, 1H), 4.46 (p, *J* = 7.1 Hz, 1H), 2.80 (dd, *J* = 17.8, 7.5 Hz, 1H), 2.41 (dd, *J* = 17.8, 6.4 Hz, 1H), 1.78 - 1.66 (m, 1H), 1.60 - 1.50 (m, 1H), 1.49 - 1.31 (m, 2H), 0.95 (t, *J* = 7.2 Hz, 3H); <sup>13</sup>C NMR (101 MHz, CDCl<sub>3</sub>) δ 167.0, 150.6, 138.5, 138.4, 136.7, 128.8, 128.7, 128.7, 128.3, 128.1, 127.6, 125.6, 122.4, 76.8, 38.4, 35.9, 18.2, 13.9 ppm; ν<sub>max</sub>(KBr)/cm<sup>-1</sup> 3057, 2959, 2929, 1735, 1612, 1447, 1351; MS (EI) *m/z* 91, 115, 141, 202, 217, 248, 318; HRMS (ESI, *m/z*): [M+H]<sup>+</sup> Calcd. for C<sub>22</sub>H<sub>23</sub>O<sub>2</sub>, 319.1693, found 319.1691.

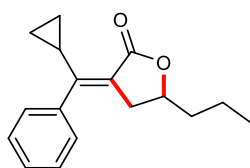

(*E*)-3-(Cyclopropyl(phenyl)methylene)-5-propyldihydrofuran-2(3H)-one (**8**): Yield: 87% as a yellow oil; <sup>1</sup>H NMR (400 MHz, CDCl<sub>3</sub>) δ 7.42 - 7.30 (m, 3H), 6.99 (d, *J* = 6.9 Hz, 2H), 4.45 - 4.34 (m, 1H), 3.55 (tt, *J* = 8.3, 5.2 Hz, 1H), 2.58 (dd, *J* = 16.6, 7.7 Hz, 1H), 2.18 (dd, *J* = 16.6, 6.6 Hz, 1H), 1.69 (ddd, *J* = 17.8, 10.3, 6.3 Hz, 1H), 1.52 - 1.36 (m, 3H), 0.92 (t, *J* = 7.1 Hz, 3H), 0.87 - 0.81 (m, 2H), 0.43 (tdd, *J* = 12.1, 6.9, 2.0 Hz, 2H); <sup>13</sup>C NMR (101 MHz, CDCl<sub>3</sub>) δ 170.9, 158.0, 137.0, 128.4, 127.6, 127.5, 121.3, 76.6, 38.4, 35.5, 18.1, 13.8, 12.8, 6.1, 6.0 ppm; ν<sub>max</sub>(KBr)/cm<sup>-1</sup> 3465, 3276, 2959, 2929, 1692, 1596, 1499; MS (EI) *m/z* 77, 91, 115, 155, 172, 186, 228, 256; HRMS (ESI, *m/z*): [M+H]<sup>+</sup> Calcd. for C<sub>17</sub>H<sub>21</sub>O<sub>2</sub>, 257.1536, found 257.1534.

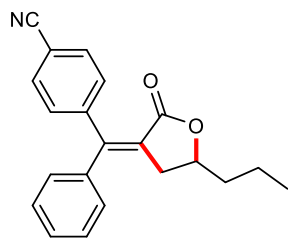

(Z)-4-((2-Oxo-5-propyldihydrofuran-3(2H)-ylidene)(phenyl)methyl)benzonitrile (**9**): Yield: 87% as a yellow solid; mp = 102.3 - 102.6 °C;  $^1\text{H}$  NMR (400 MHz,  $\text{CDCl}_3$ )  $\delta$  7.65 (d,  $J$  = 8.4 Hz, 2H), 7.46 - 7.35 (m, 3H), 7.32 (d,  $J$  = 8.4 Hz, 2H), 7.23 - 7.12 (m, 2H), 4.58 - 4.45 (m, 1H), 3.19 (dd,  $J$  = 16.7, 7.0 Hz, 1H), 2.84 (dd,  $J$  = 16.7, 6.7 Hz, 1H), 1.83 - 1.74 (m, 1H), 1.69 - 1.58 (m, 1H), 1.56 - 1.41 (m, 2H), 0.98 (t,  $J$  = 7.3 Hz, 3H);  $^{13}\text{C}$  NMR (101 MHz,  $\text{CDCl}_3$ )  $\delta$  169.1, 149.4, 143.8, 139.8, 131.8, 130.2, 129.4, 129.0, 129.0, 128.7, 125.1, 118.8, 112.0, 76.8, 38.1, 36.9, 18.3, 13.8 ppm;  $\nu_{\text{max}}(\text{KBr})/\text{cm}^{-1}$  3034, 3450, 2960, 2931, 2227, 1751, 1634, 1443; MS (EI)  $m/z$  91, 115, 140, 217, 246, 274, 317; HRMS (ESI,  $m/z$ ):  $[\text{M}+\text{H}]^+$  Calcd. for  $\text{C}_{21}\text{H}_{20}\text{NO}_2$ , 318.1489, found 318.1487.

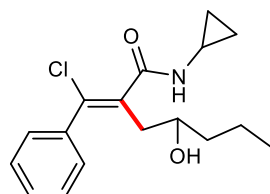

(Z)-2-(Chloro(phenyl)methylene)-N-cyclopropyl-4-hydroxyheptanamide (**10**): Yield: 87% as a yellow oil;  $^1\text{H}$  NMR (400 MHz, DMSO)  $\delta$  8.26 (d,  $J$  = 4.3 Hz, 1H), 7.63 - 7.18 (m, 5H), 4.54 (s, 1H), 3.53 - 3.42 (m, 1H), 2.79 - 2.68 (m, 1H), 2.23 (d,  $J$  = 6.5 Hz, 2H), 1.38 - 1.25 (m, 2H), 1.21 - 1.09 (m, 3H), 0.79 (t,  $J$  = 6.9 Hz, 2H), 0.73 - 0.66 (m, 2H), 0.57 - 0.45 (m, 2H),  $^{13}\text{C}$  NMR (101 MHz, DMSO)  $\delta$  169.1, 137.4, 135.8, 129.3, 128.9, 128.1, 68.1, 39.0, 22.8, 18.7, 14.3, 6.1, 6.0 ppm;  $\nu_{\text{max}}(\text{KBr})/\text{cm}^{-1}$  3409, 3270, 3060, 2959, 2928, 1744, 1623, 1544; MS (EI)  $m/z$  89, 114, 141, 179, 231, 276, 307; HRMS (ESI,  $m/z$ ):  $[\text{M}+\text{H}]^+$  Calcd. for  $\text{C}_{17}\text{H}_{23}\text{ClNO}_2$ , 308.1412, found 308.1410.

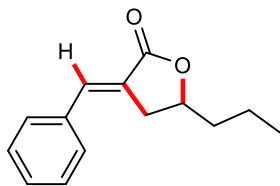

(*E*)-3-Benzylidene-5-propyldihydrofuran-2(3H)-one (**11**): Yield: 66% as a yellow oil;  $^1\text{H}$  NMR (400 MHz,  $\text{CDCl}_3$ )  $\delta$  7.58 (d,  $J = 5.8$  Hz, 1H), 7.54 - 7.33 (m, 5H), 4.65 (tt,  $J = 7.7, 5.5$  Hz, 1H), 3.36 (ddd,  $J = 17.4, 7.9, 2.8$  Hz, 1H), 2.85 (ddd,  $J = 17.5, 5.6, 3.1$  Hz, 1H), 1.88 - 1.75 (m, 1H), 1.71 - 1.64 (m, 1H), 1.62 - 1.46 (m, 2H), 1.00 (t,  $J = 7.3$  Hz, 3H);  $^{13}\text{C}$  NMR (101 MHz,  $\text{CDCl}_3$ )  $\delta$  172.2, 136.4, 130.0, 129.8, 128.9, 128.8, 124.9, 77.5, 38.7, 33.7, 18.3, 13.8 ppm;  $\nu_{\text{max}}(\text{KBr})/\text{cm}^{-1}$  3059, 2958, 2927, 1748, 1654, 1454; MS (EI)  $m/z$  89, 116, 129, 145, 173, 216; HRMS (ESI,  $m/z$ ):  $[\text{M}+\text{H}]^+$  Calcd. for  $\text{C}_{14}\text{H}_{17}\text{O}_2$ , 217.1223, found 217.1221.

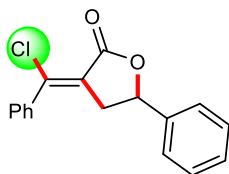

(*Z*)-3-(Chloro(phenyl)methylene)-5-phenyldihydrofuran-2(3H)-one (**12**): Yield: 90% as a yellow oil;  $^1\text{H}$  NMR (400 MHz,  $\text{CDCl}_3$ )  $\delta$  7.54 - 7.49 (m, 2H), 7.47 - 7.42 (m, 3H), 7.43 - 7.29 (m, 5H), 5.41 (t,  $J = 7.4$  Hz, 1H), 3.46 (dd,  $J = 16.6, 7.4$  Hz, 1H), 3.07 (dd,  $J = 16.6, 7.3$  Hz, 1H);  $^{13}\text{C}$  NMR (101 MHz,  $\text{CDCl}_3$ )  $\delta$  167.4, 140.1, 139.3, 137.7, 130.4, 128.9, 128.7, 128.6, 128.2, 125.4, 122.5, 76.8, 40.0 ppm;  $\nu_{\text{max}}(\text{KBr})/\text{cm}^{-1}$  3061, 2925, 1962, 1644, 1493, 1446; MS (EI)  $m/z$  89, 115, 127, 150, 178, 284; HRMS (ESI,  $m/z$ ):  $[\text{M}+\text{H}]^+$  Calcd. for  $\text{C}_{14}\text{H}_{18}\text{O}_2$ , 285.0677, found 285.0670.

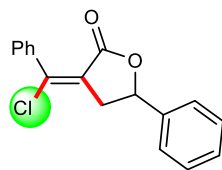

(*E*)-3-(Chloro(phenyl)methylene)-5-phenyldihydrofuran-2(3H)-one (**13**): Yield: 87% as a yellow oil;  $^1\text{H}$  NMR (400 MHz,  $\text{CDCl}_3$ )  $\delta$  7.61 - 7.52 (m, 2H), 7.49 - 7.43 (m, 5H), 7.43 - 7.37 (m, 3H), 5.61 (dd,  $J = 8.2, 6.4$  Hz, 1H), 3.71 (dd,  $J = 17.9, 8.2$  Hz, 1H), 3.21 (dd,  $J = 17.9, 6.4$  Hz, 1H);  $^{13}\text{C}$  NMR (101 MHz,  $\text{CDCl}_3$ )  $\delta$  165.8, 146.0, 139.8, 135.1, 130.4, 129.2, 129.0, 128.7, 128.0, 125.5, 123.6, 76.7, 39.6 ppm;  $\nu_{\text{max}}(\text{KBr})/\text{cm}^{-1}$  3062, 2923, 1964, 1761, 1684, 1631, 1494; MS (EI)  $m/z$  89, 115, 127, 150, 178, 284; HRMS (ESI,  $m/z$ ):  $[\text{M}+\text{H}]^+$  Calcd. for  $\text{C}_{14}\text{H}_{18}\text{O}_2$ , 285.0677, found 285.0673.

# <sup>1</sup>H and <sup>13</sup>C NMR spectra of all compounds

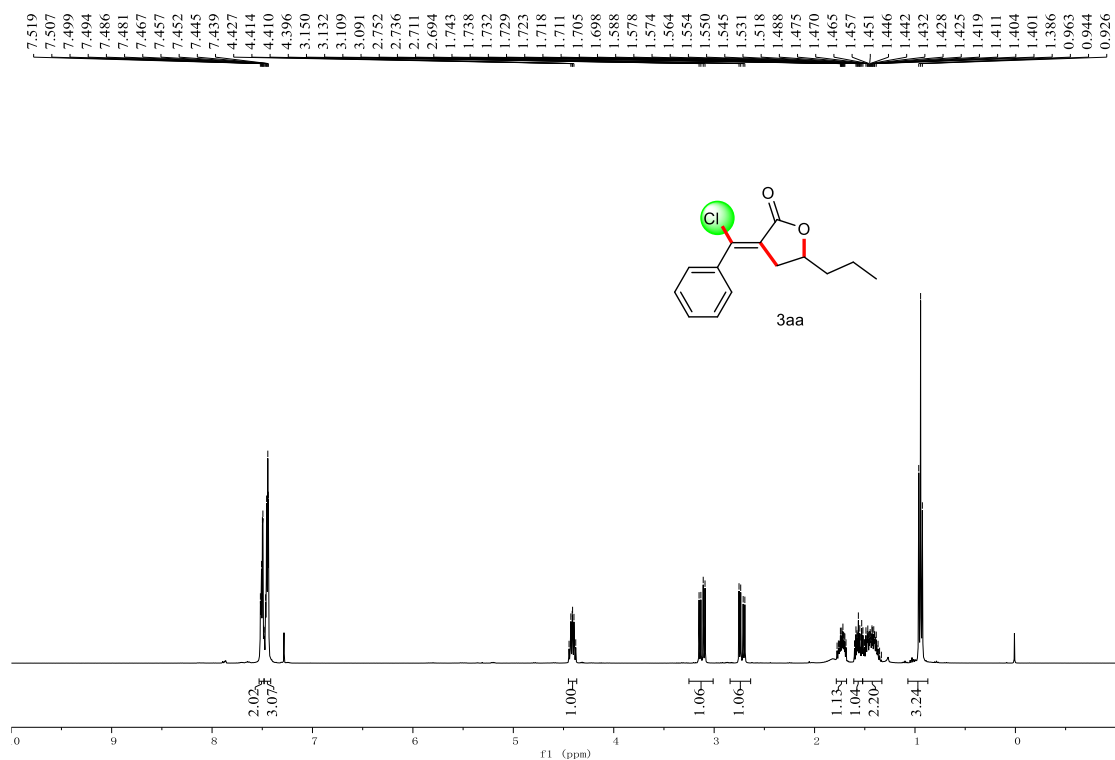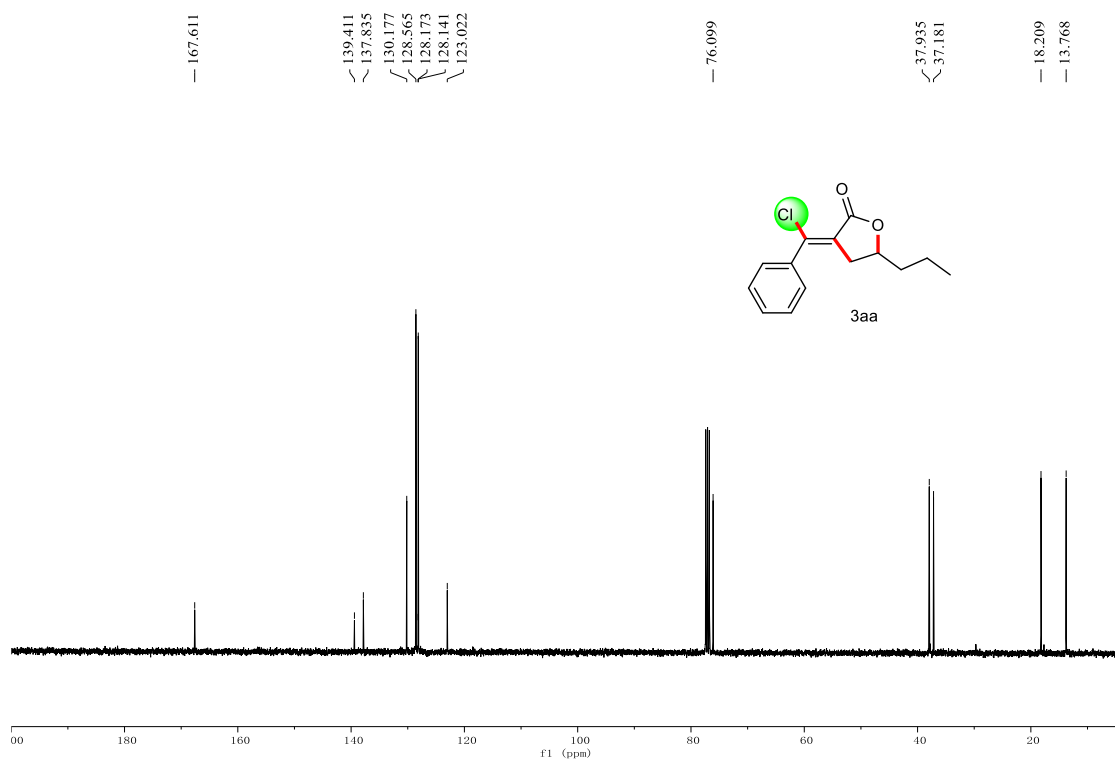

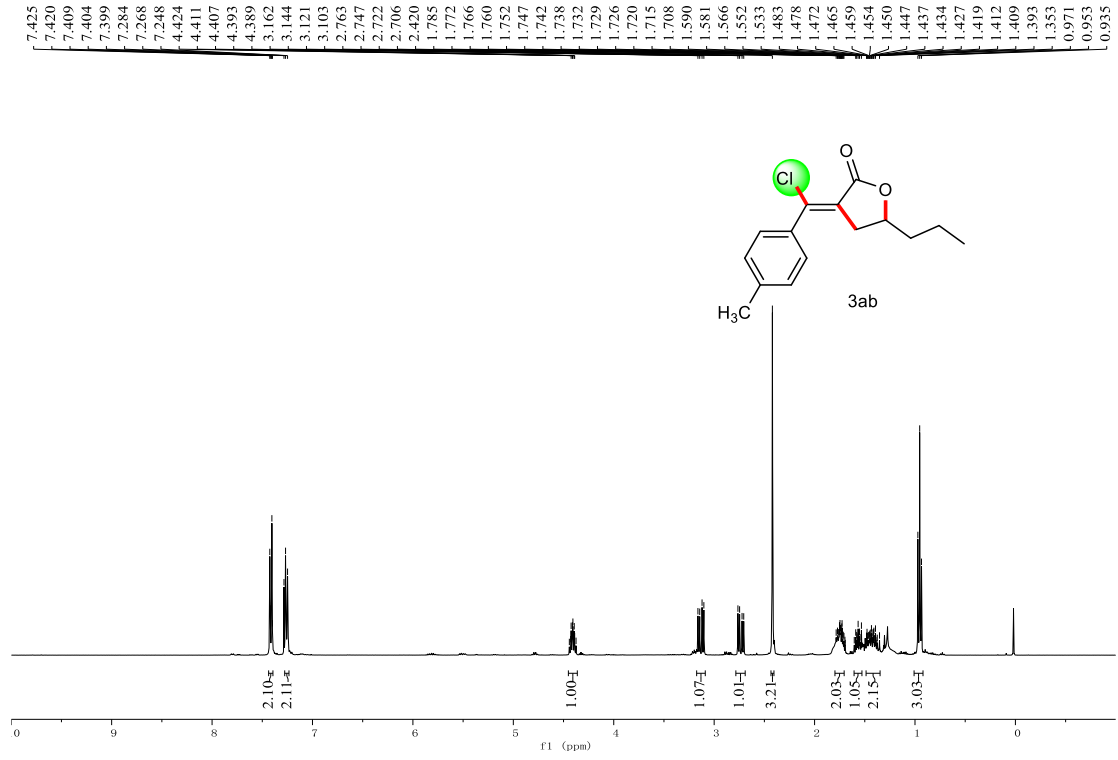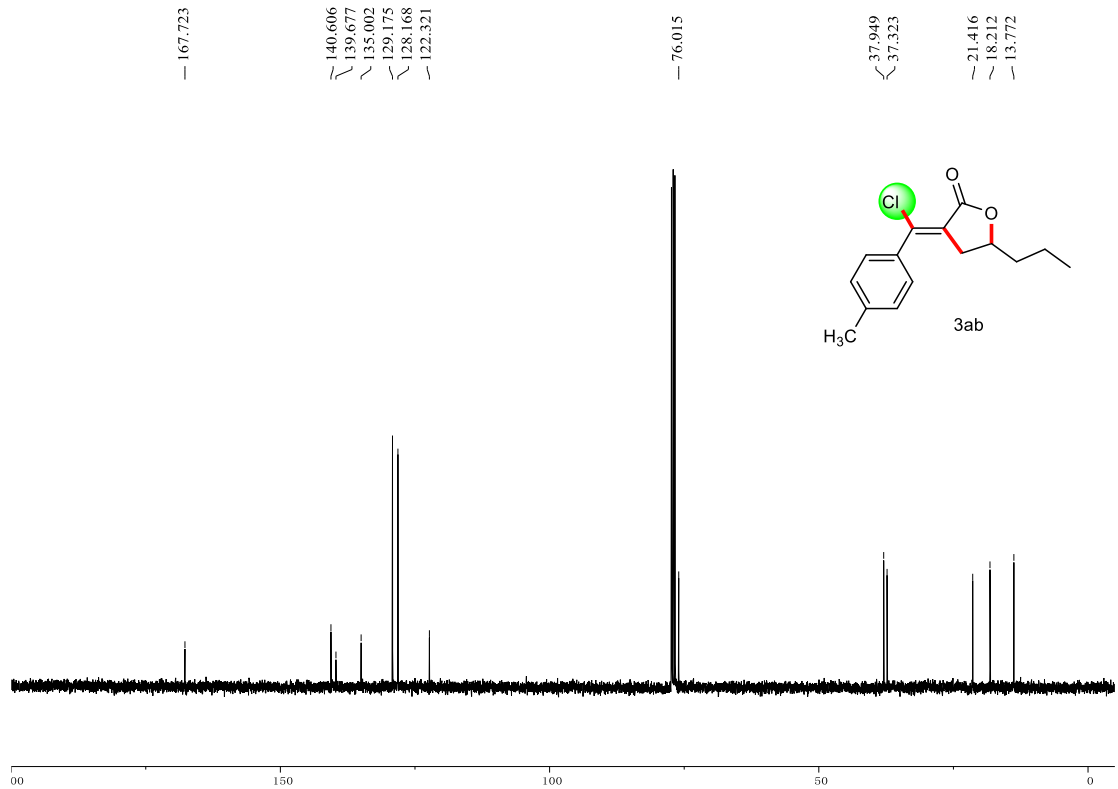

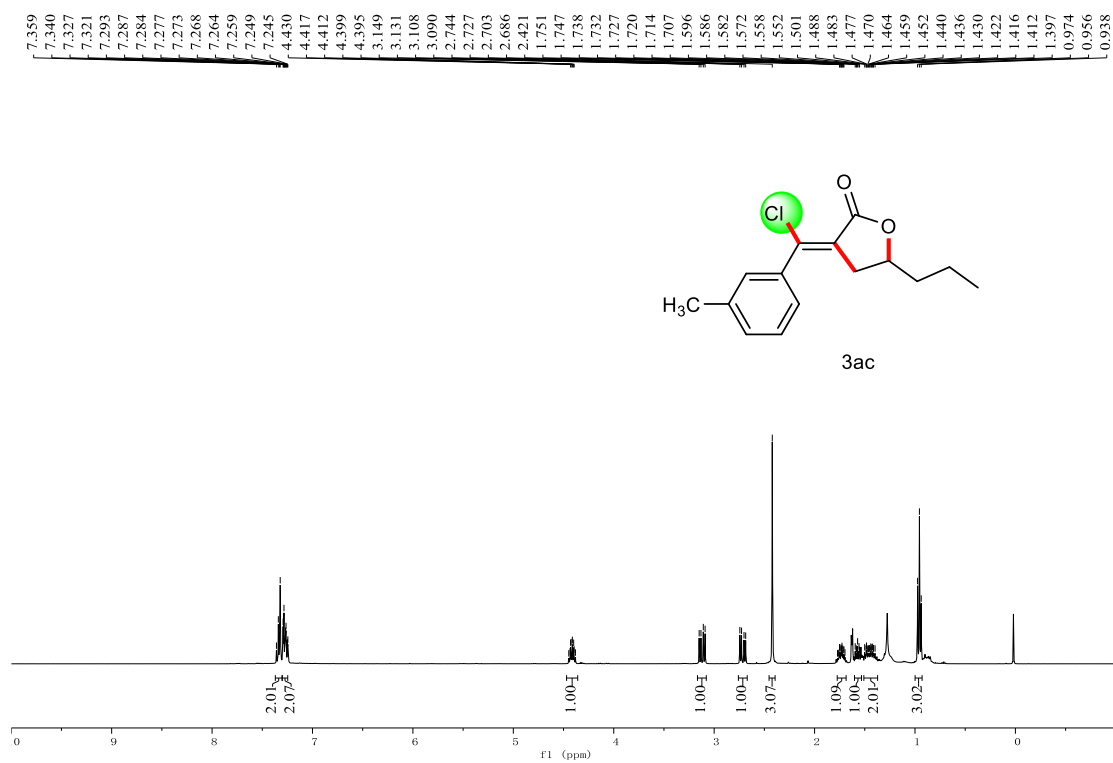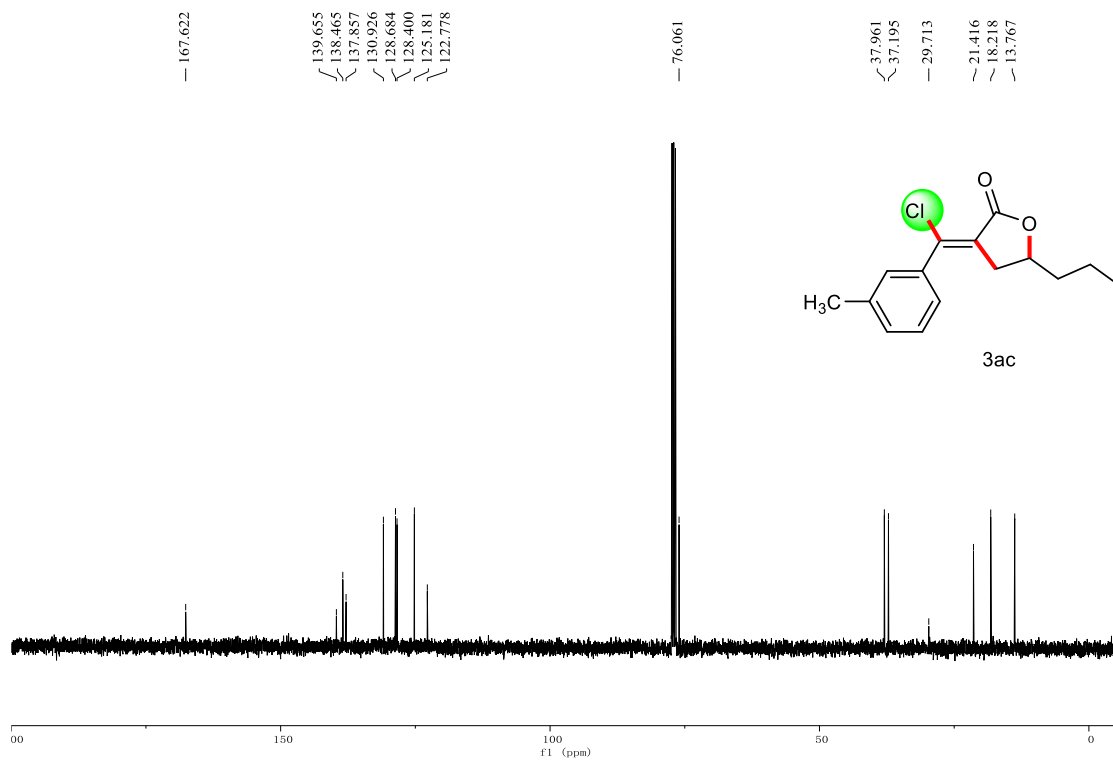



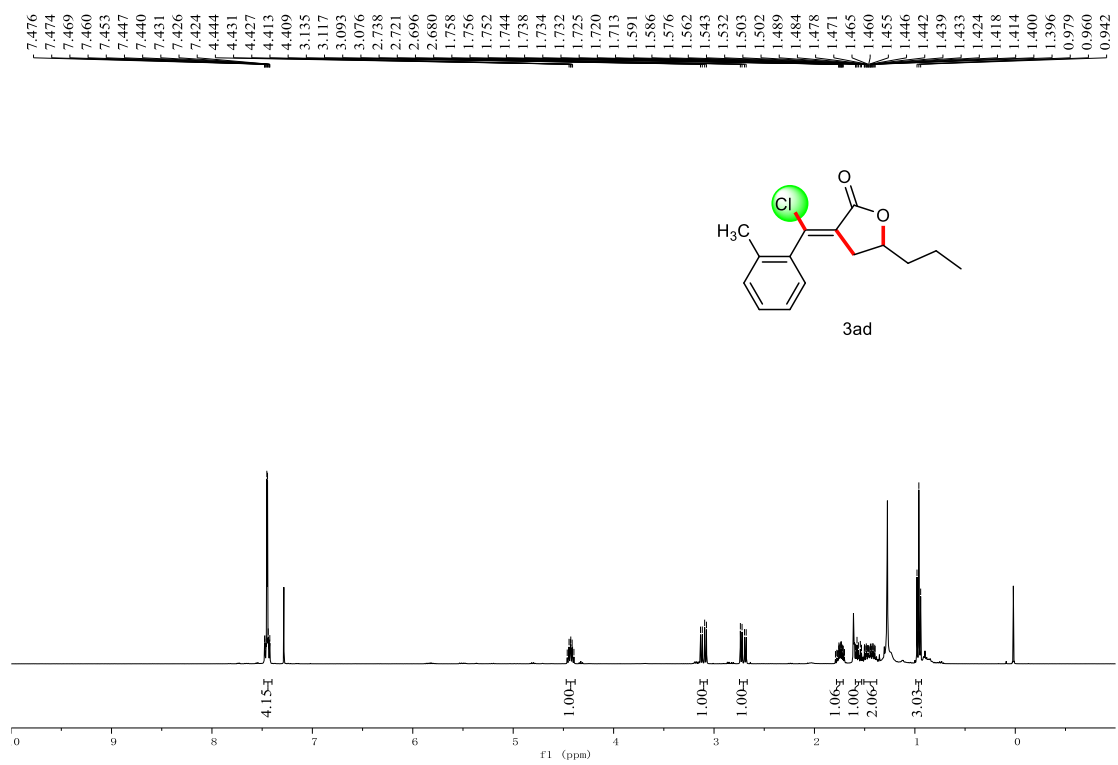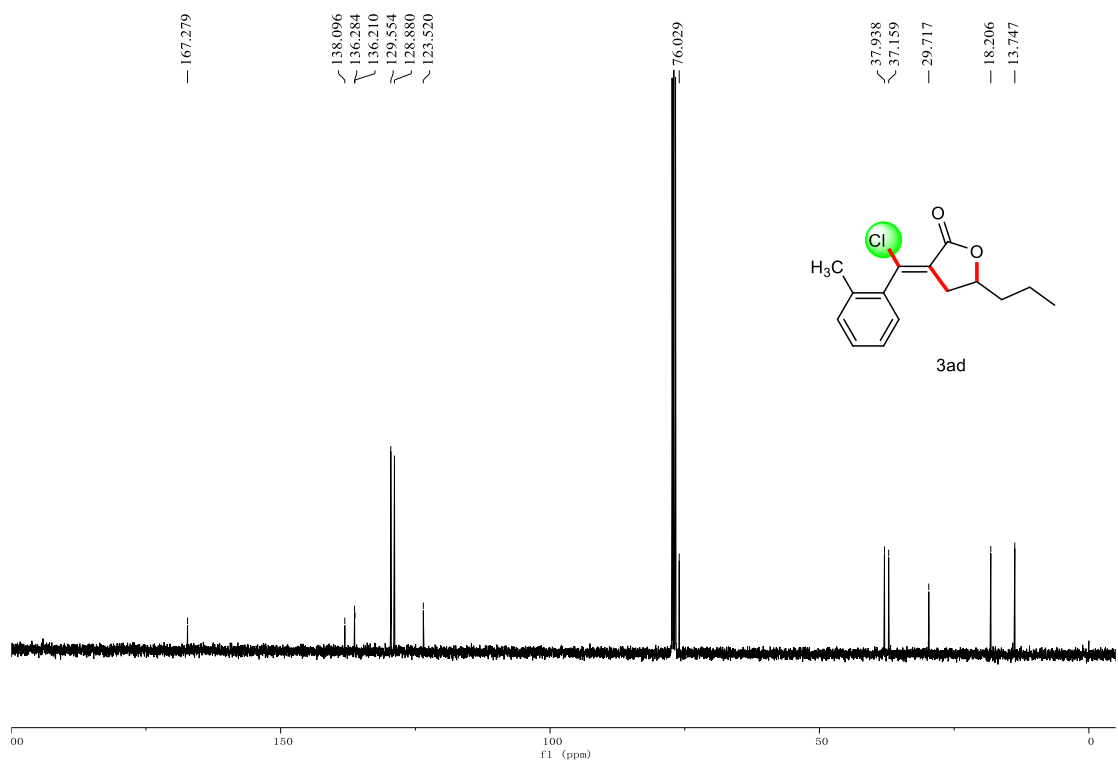

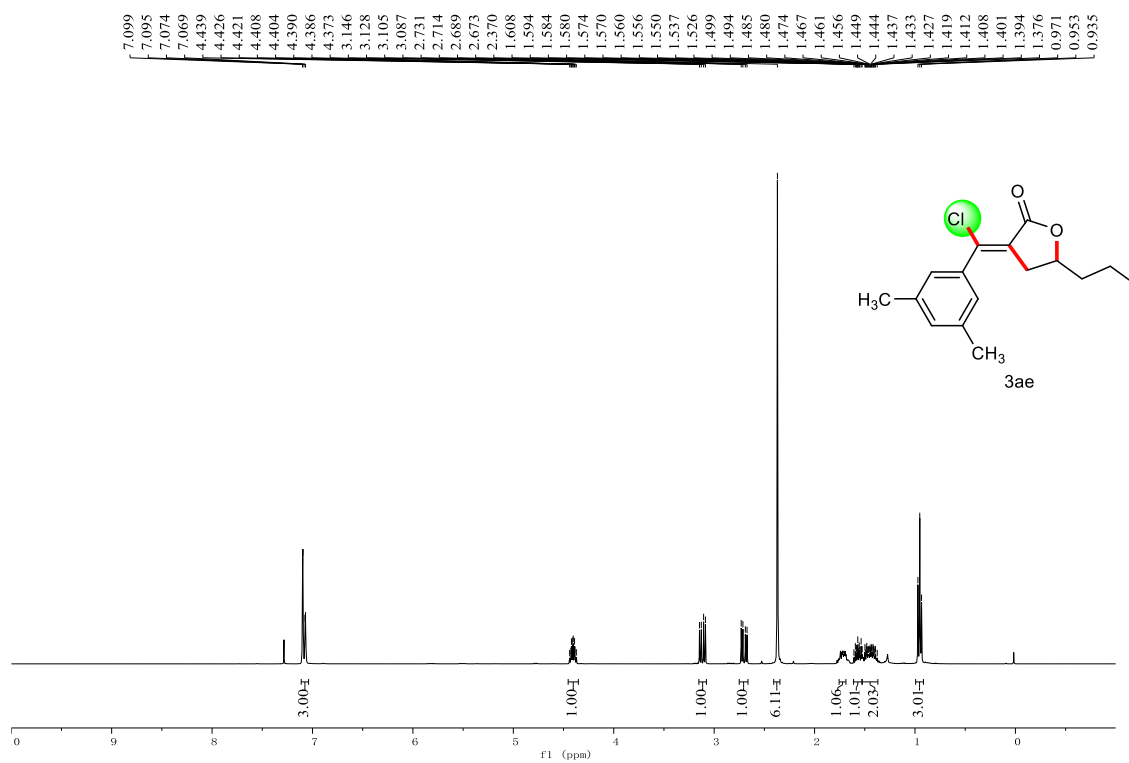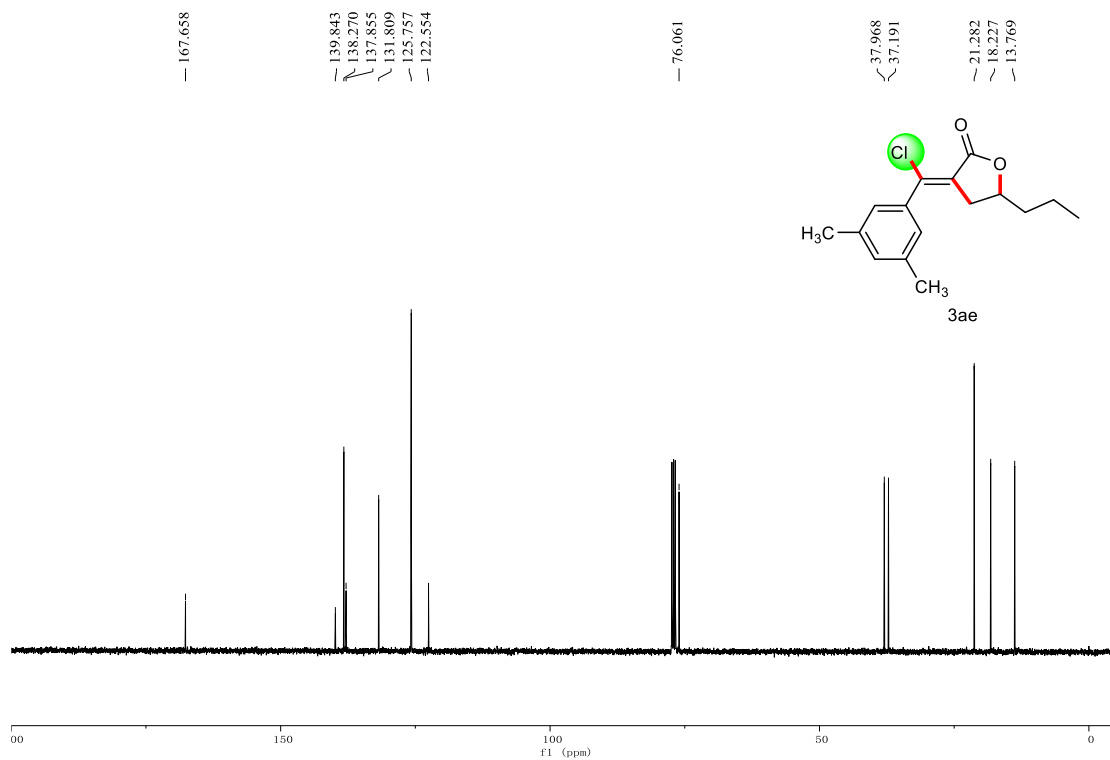

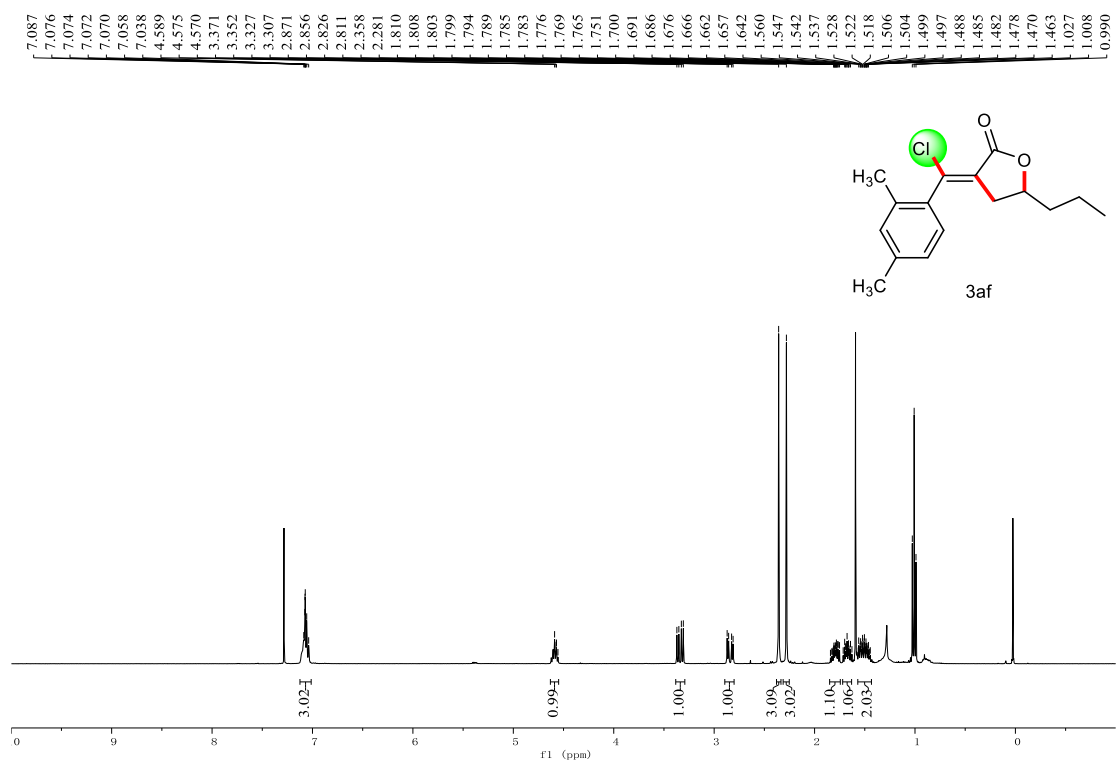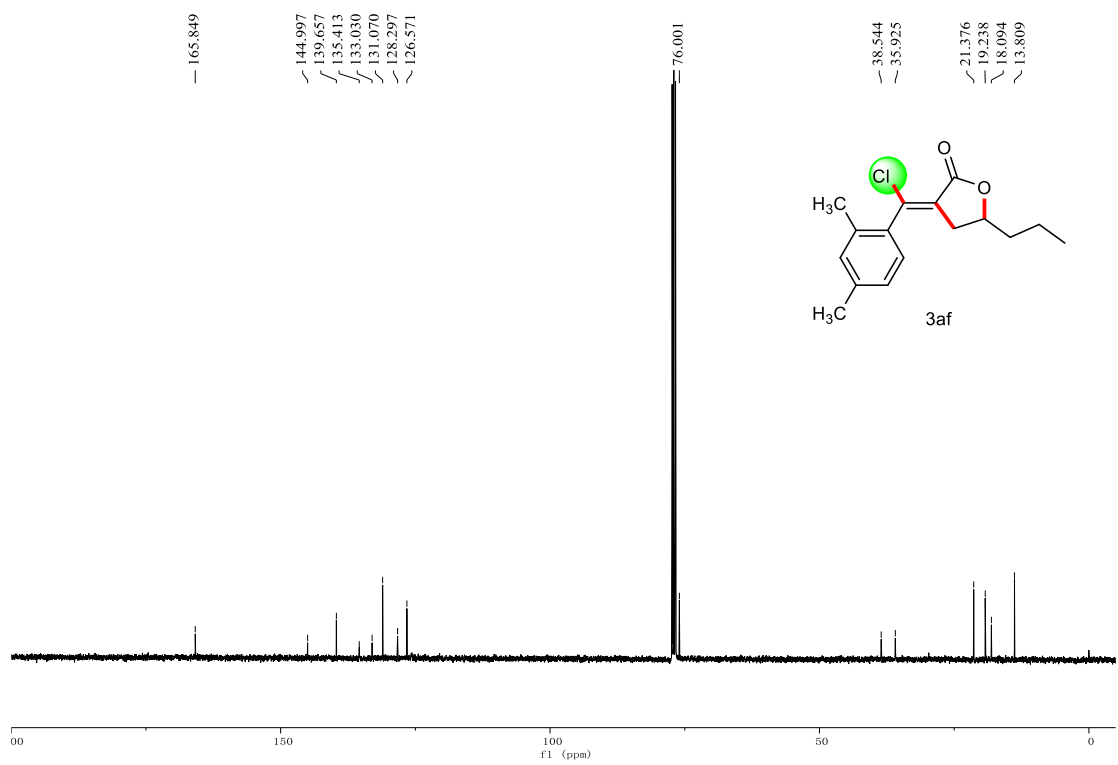

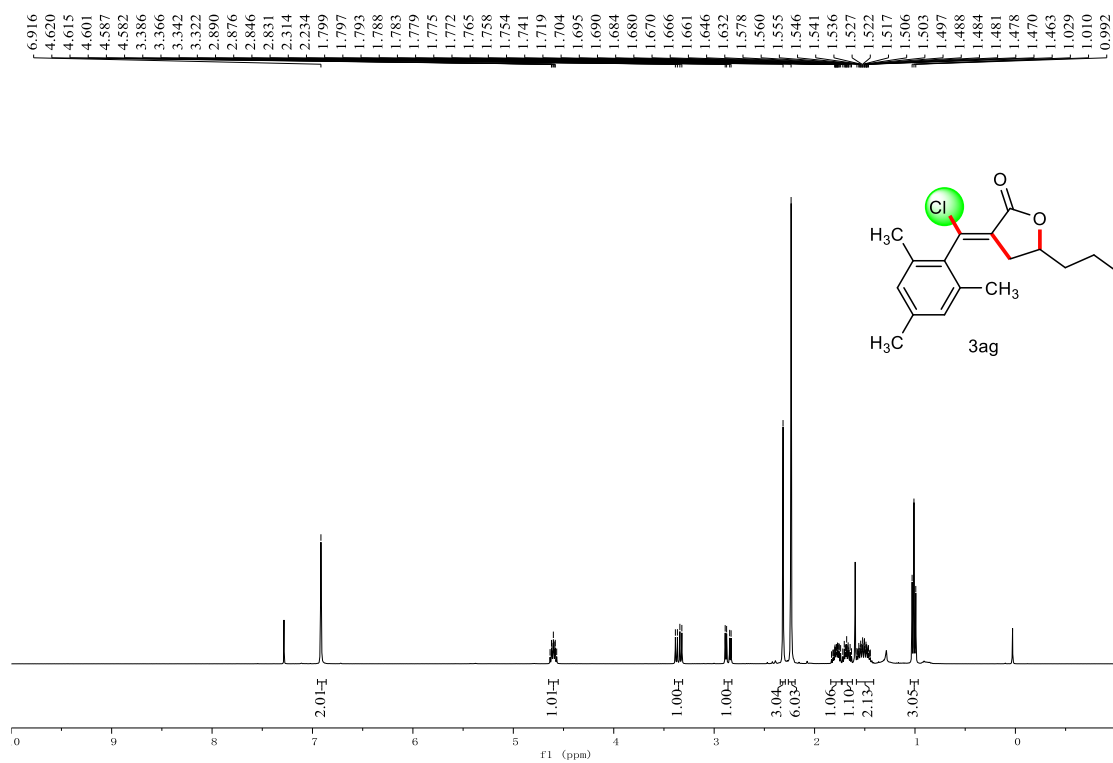

165.676

144.640  
139.068  
135.109  
135.052  
132.793  
128.459  
128.434  
126.363

76.018

38.599  
35.556  
21.271  
19.387  
19.358  
18.034  
13.820

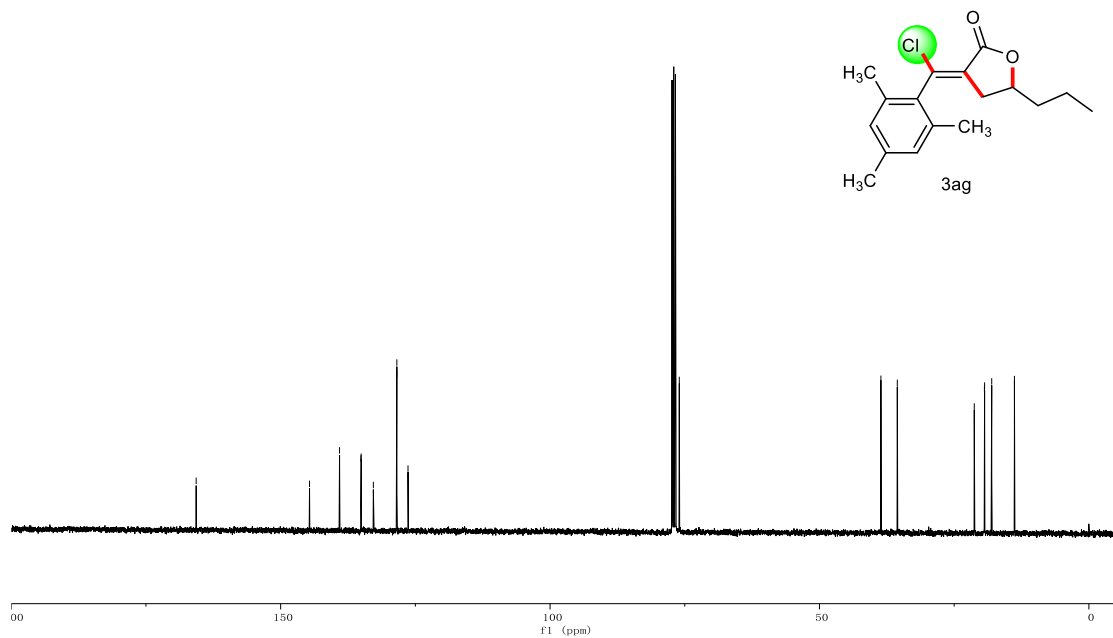

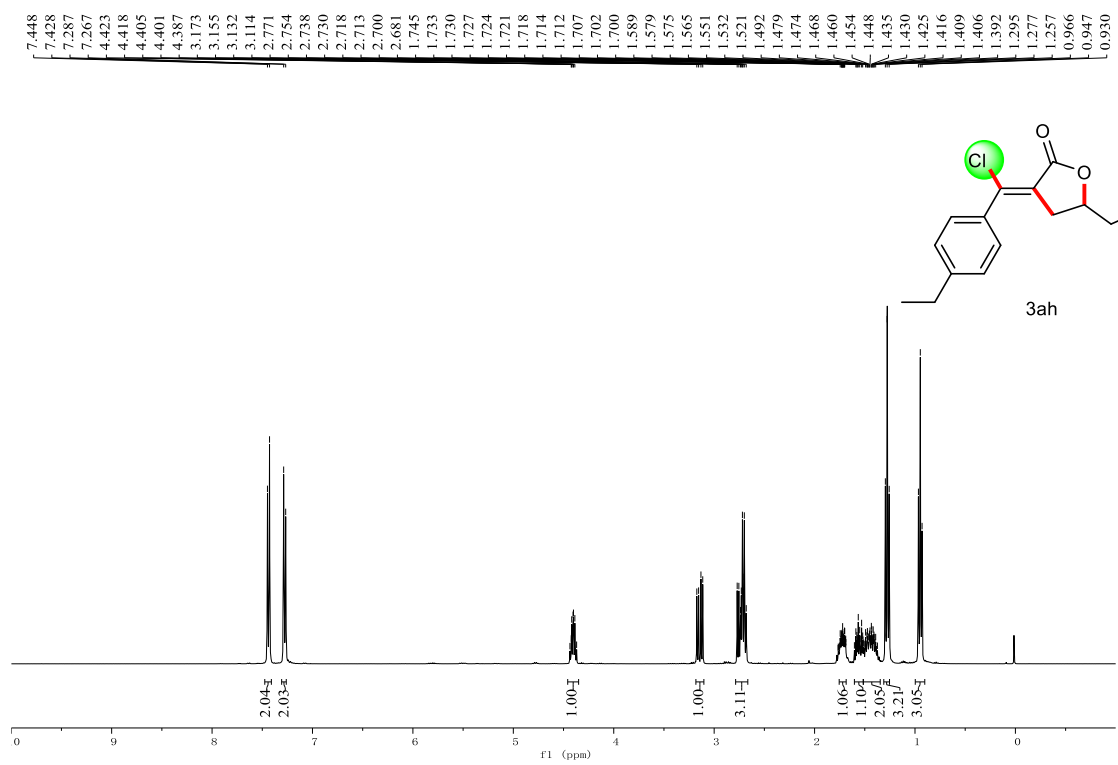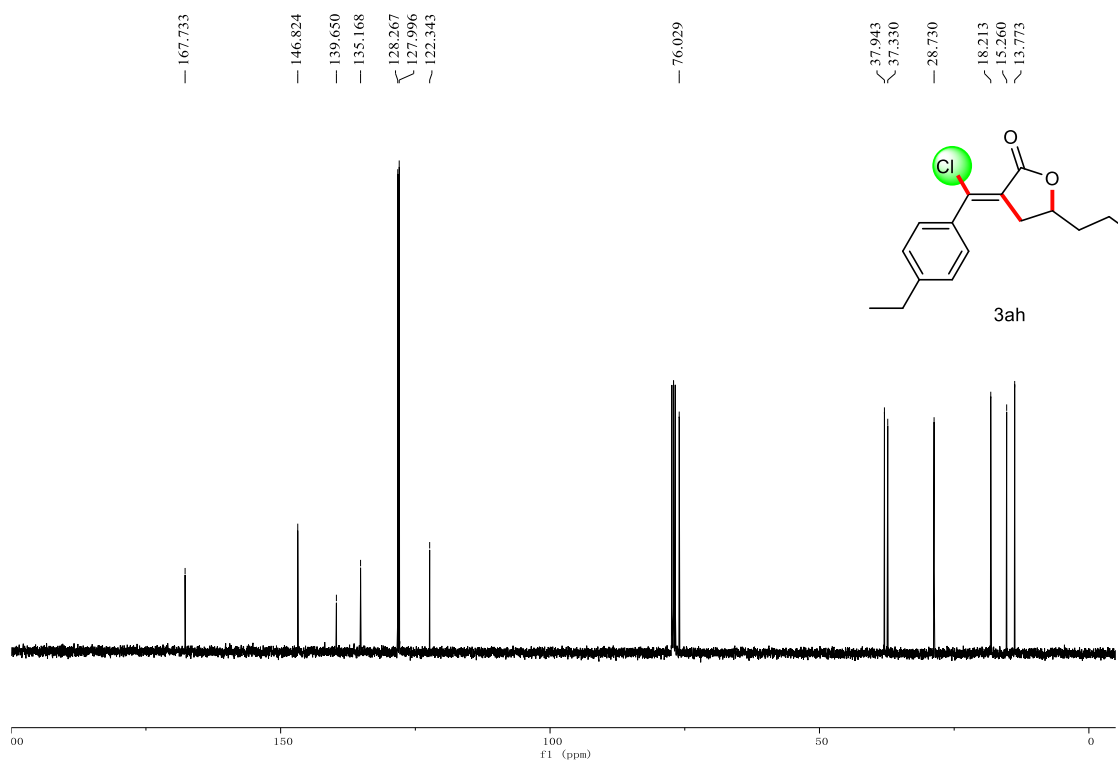

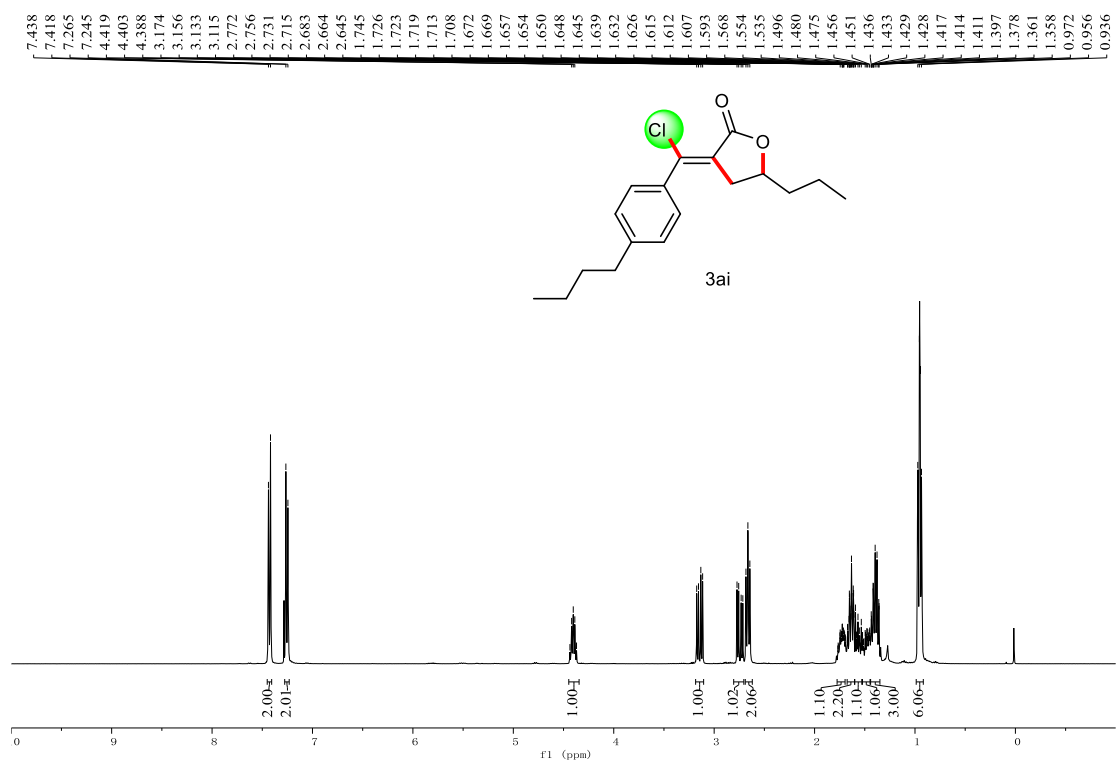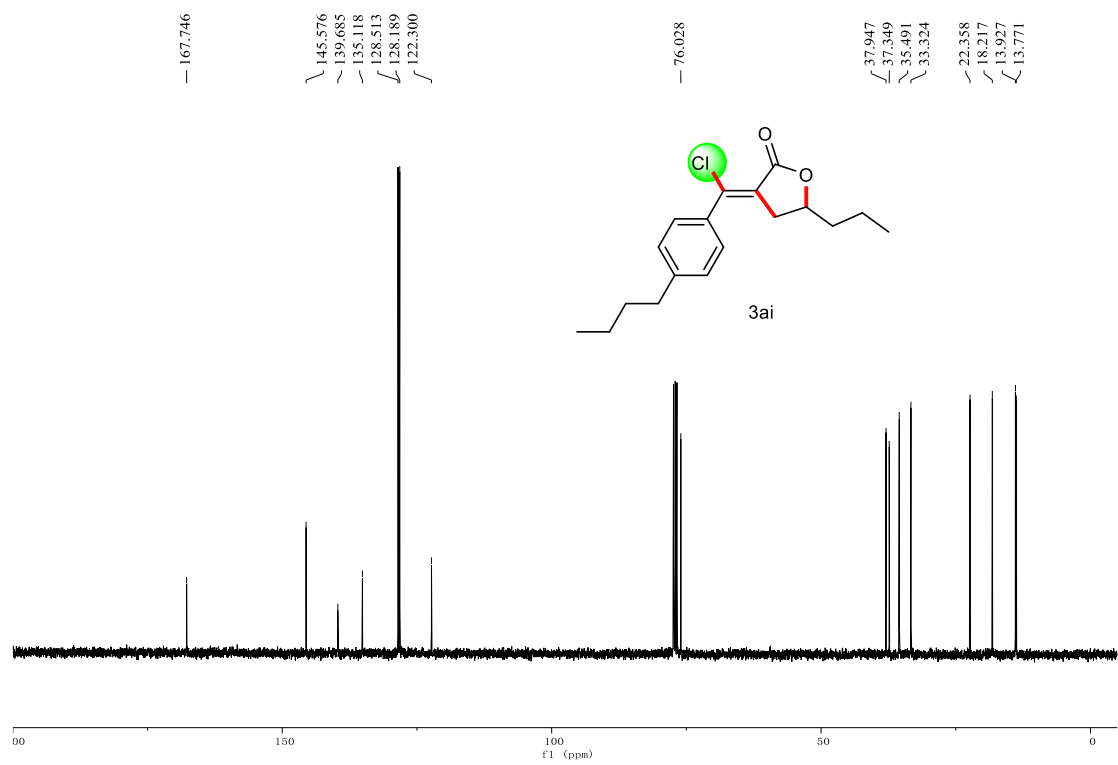

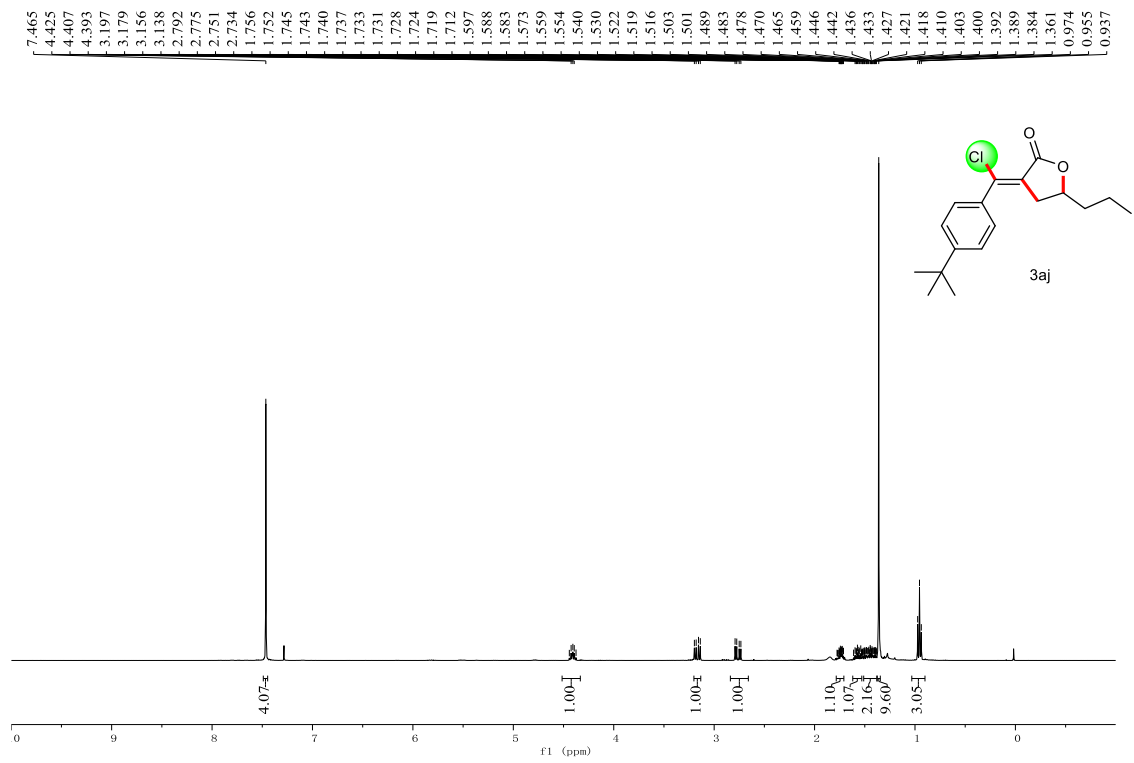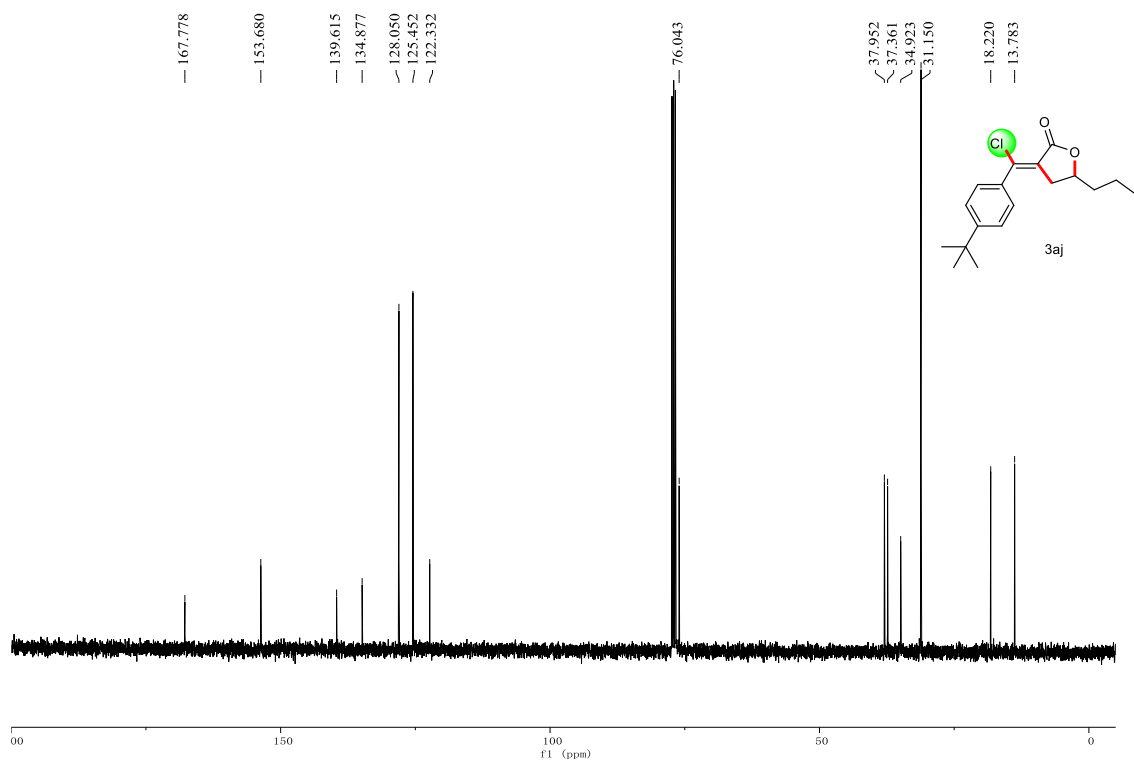

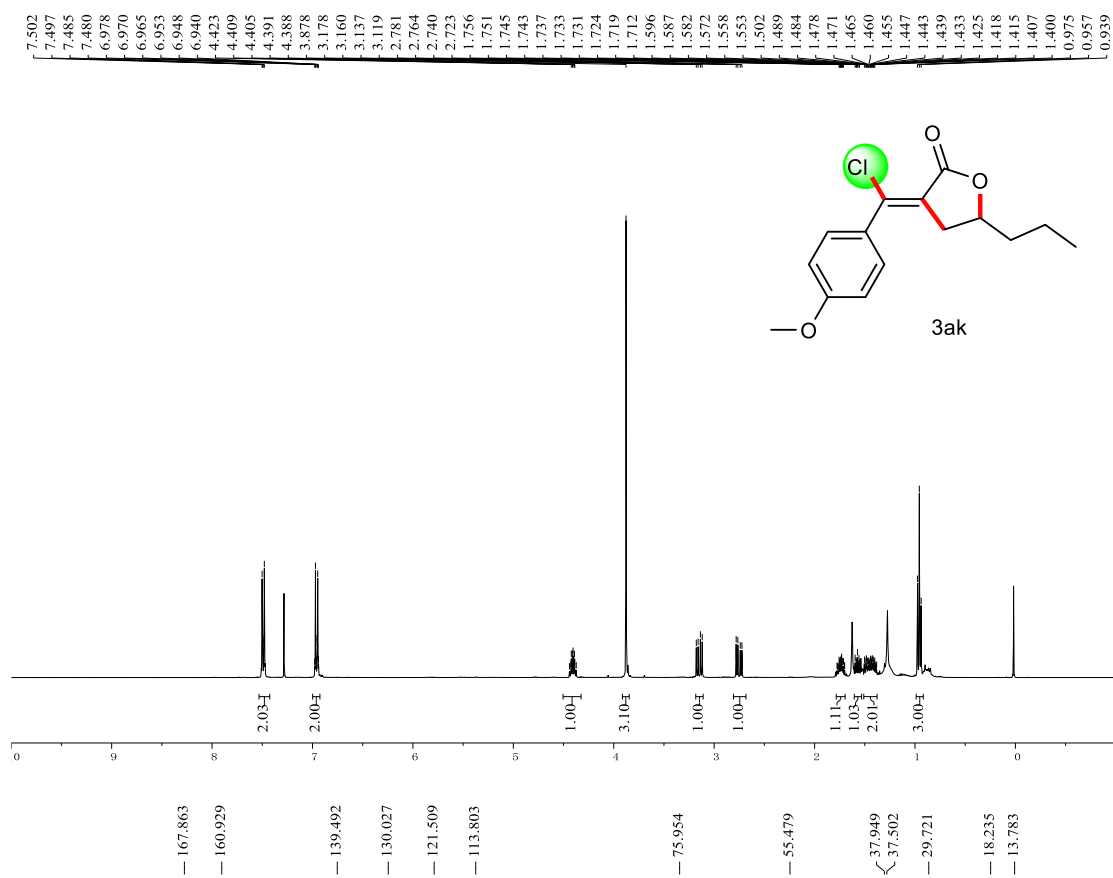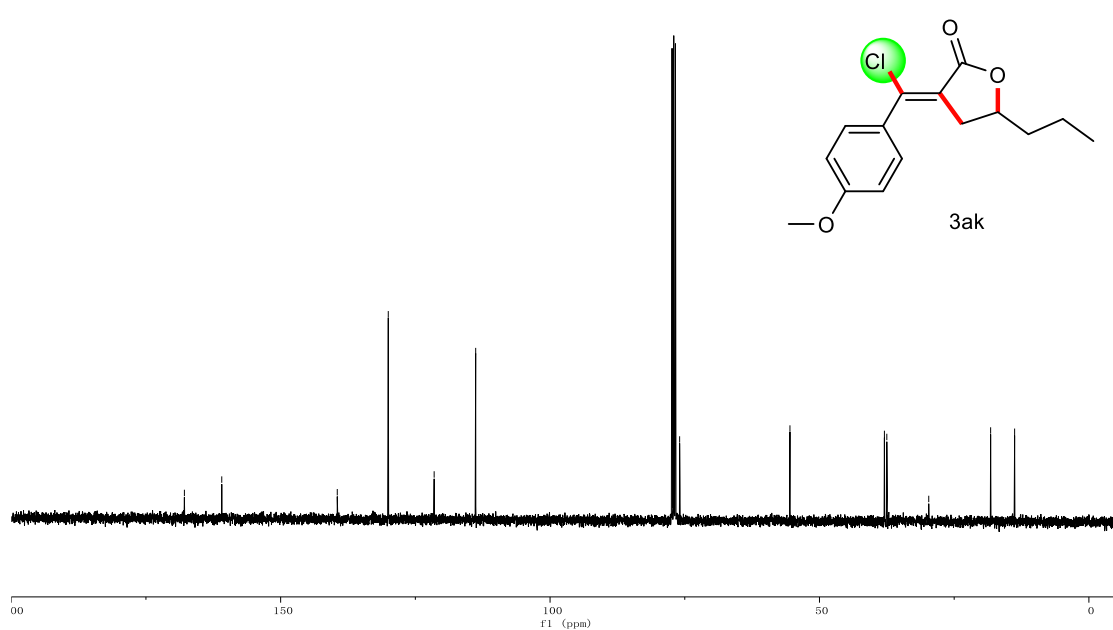



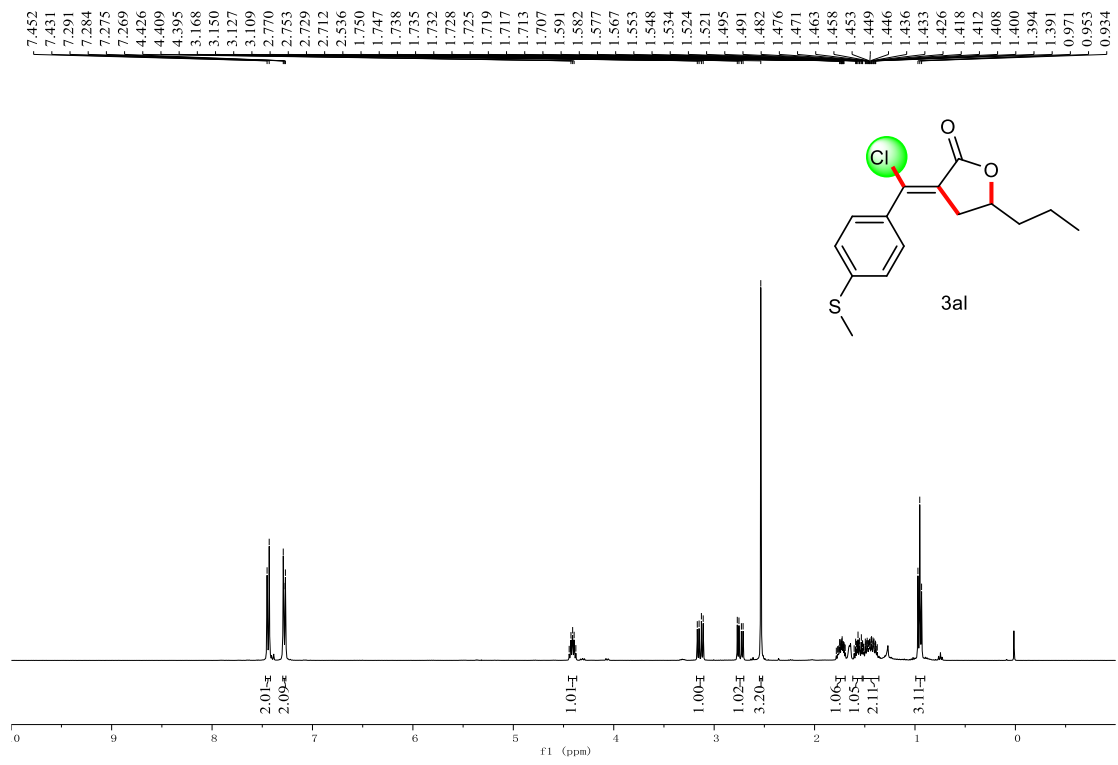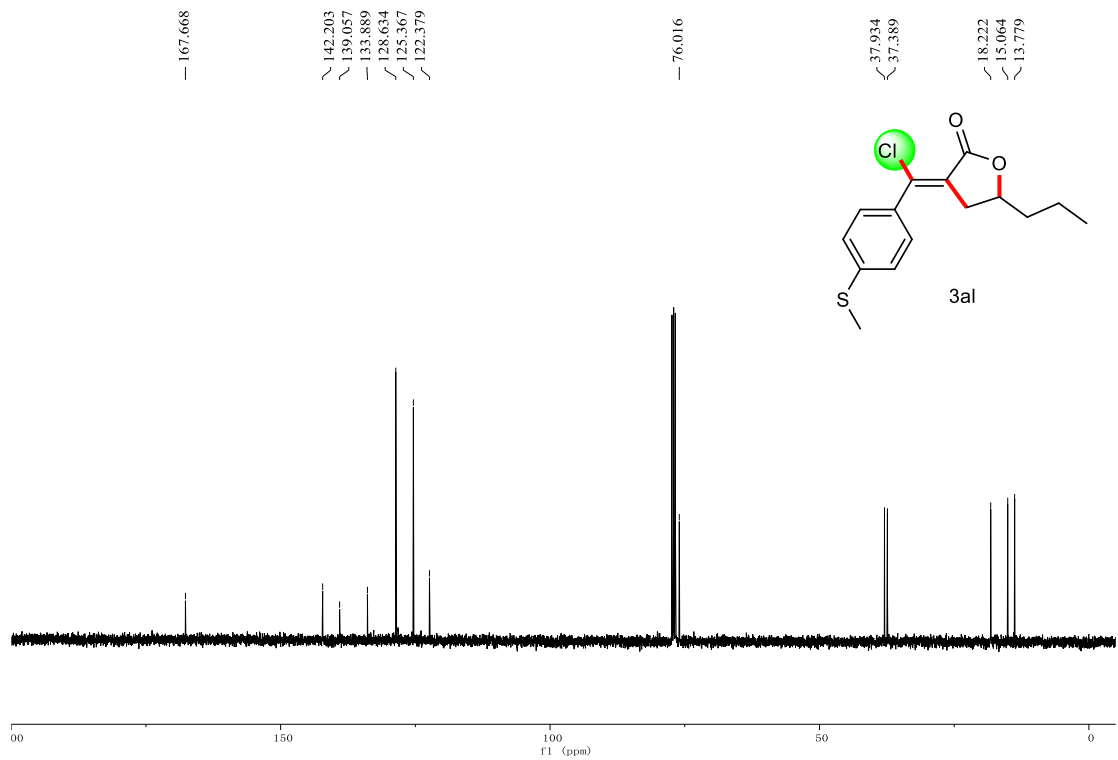

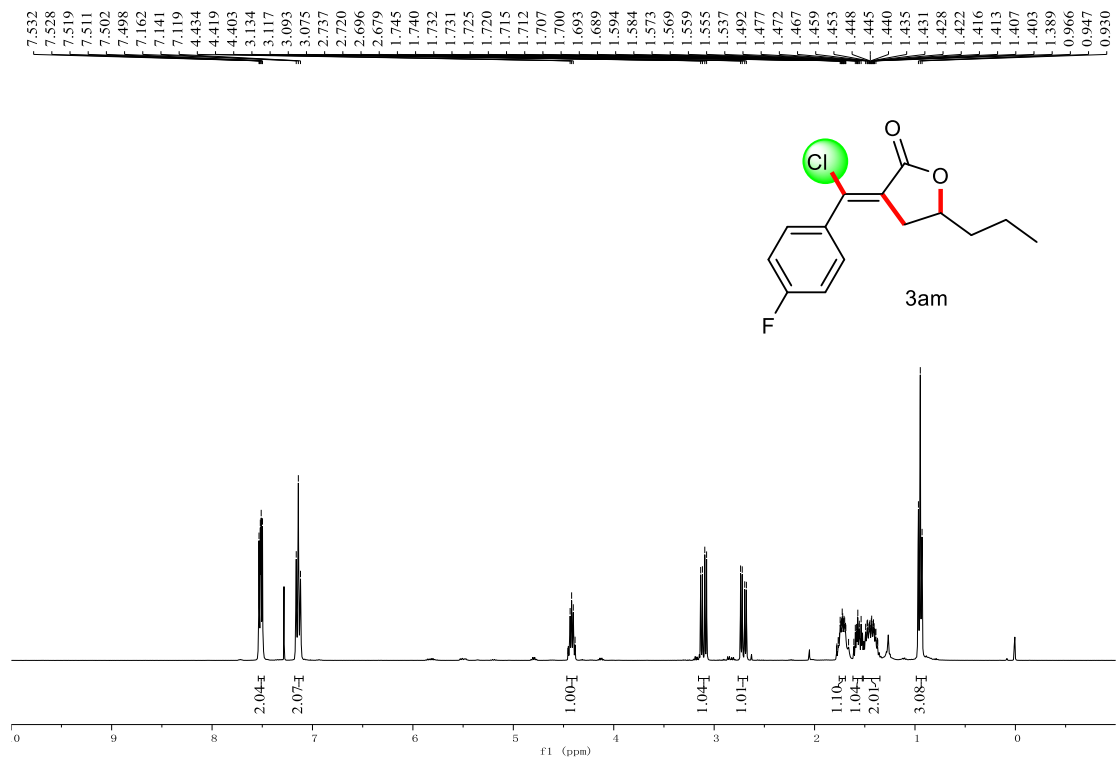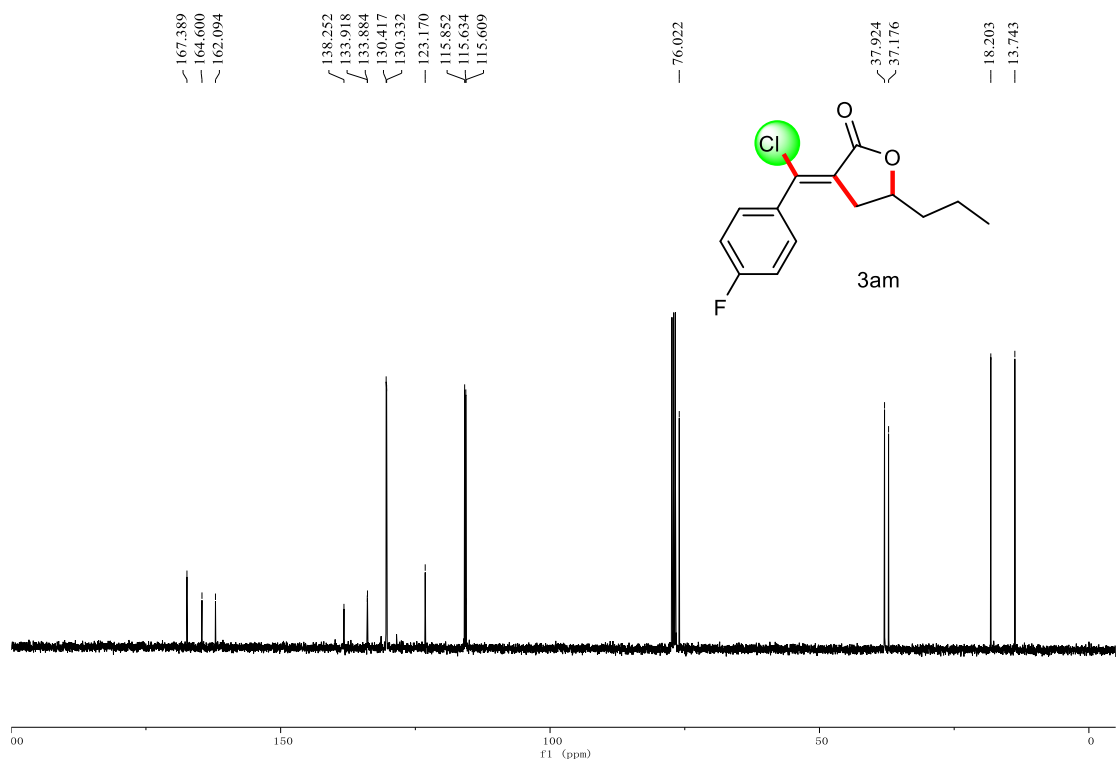

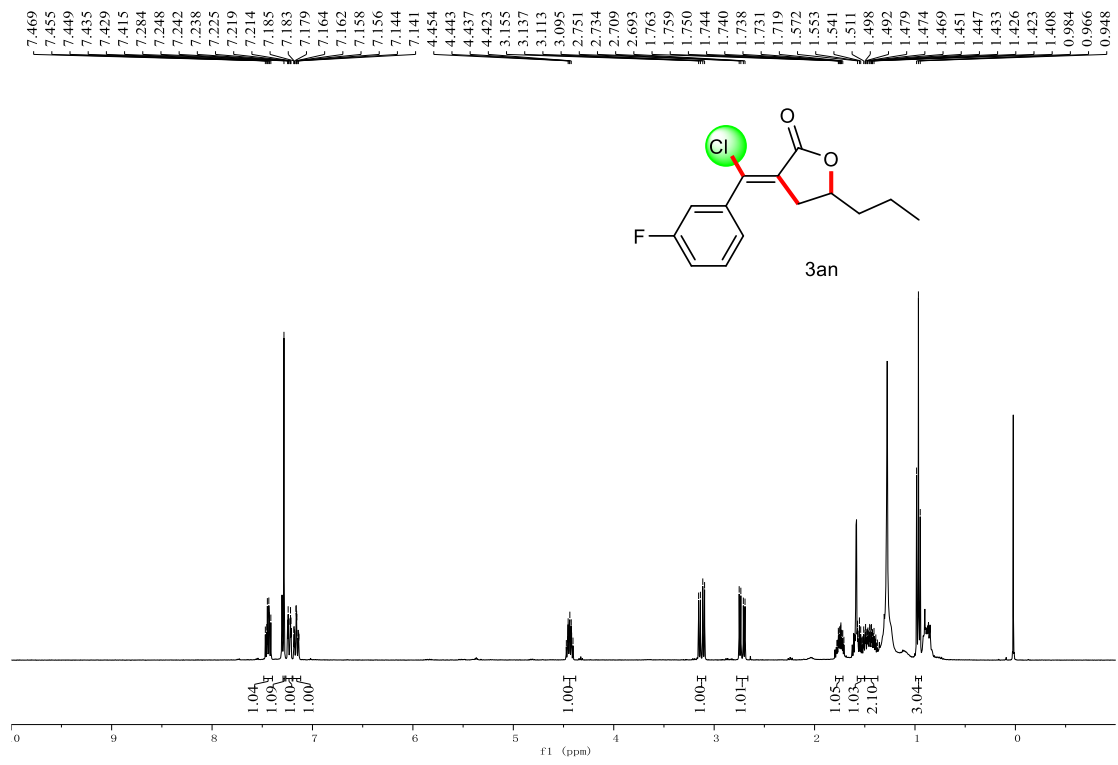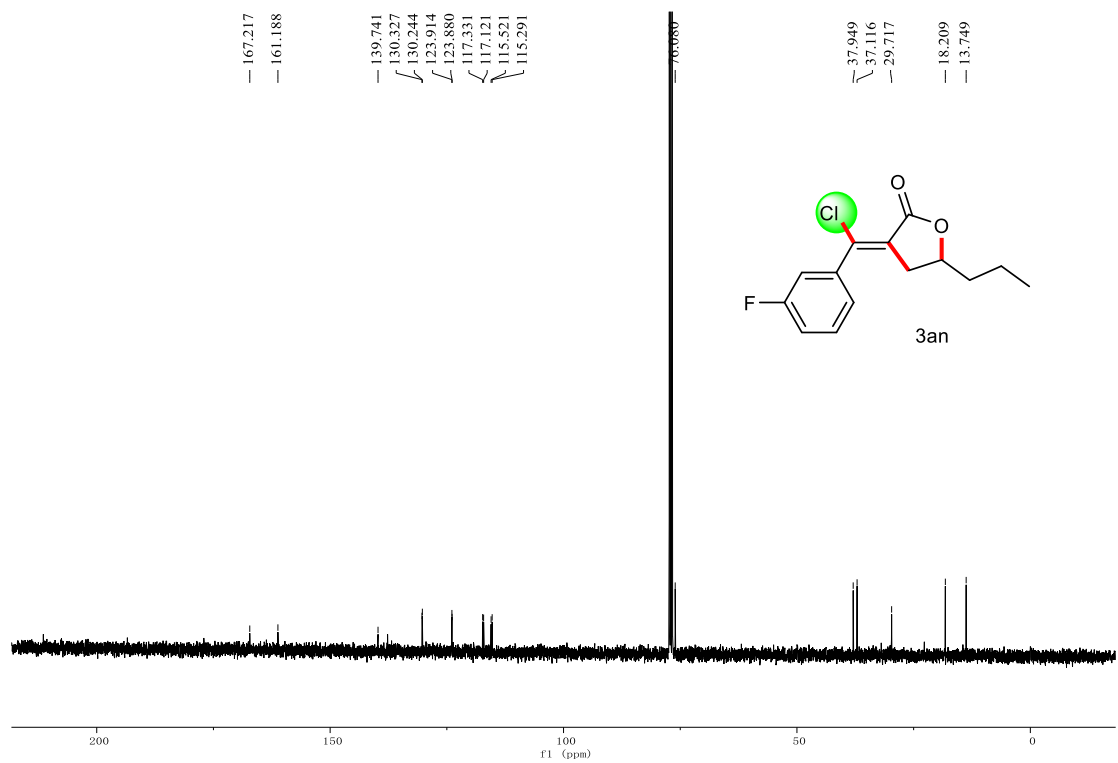

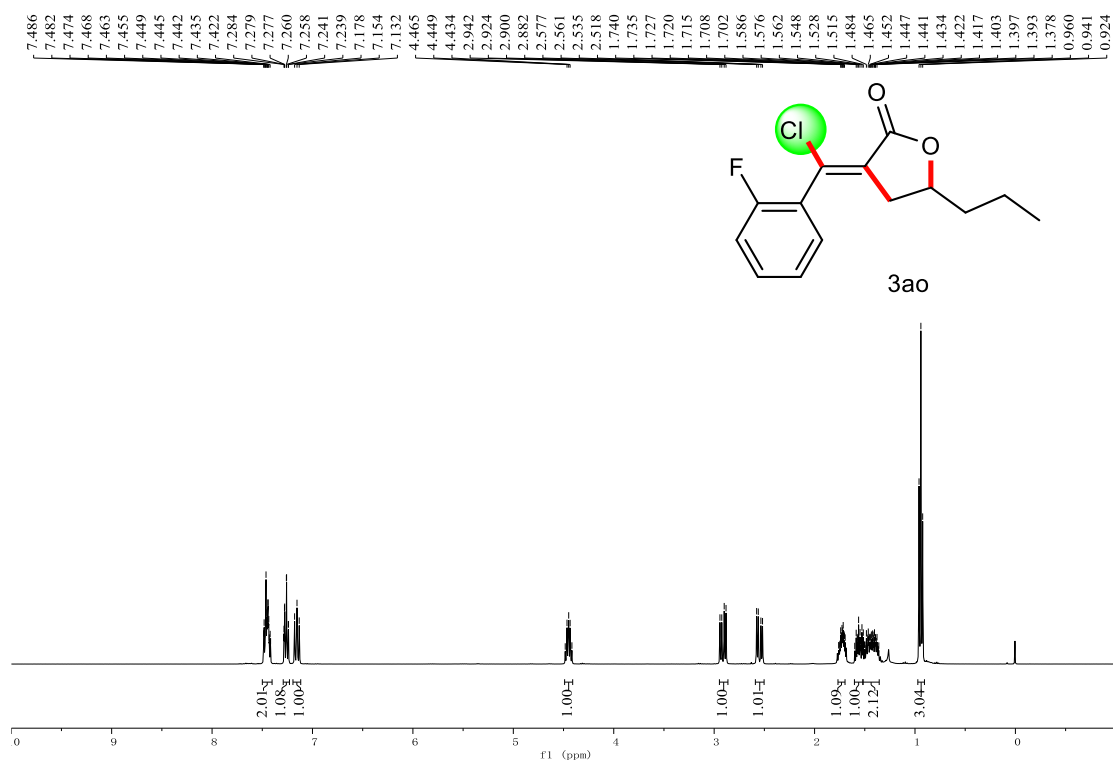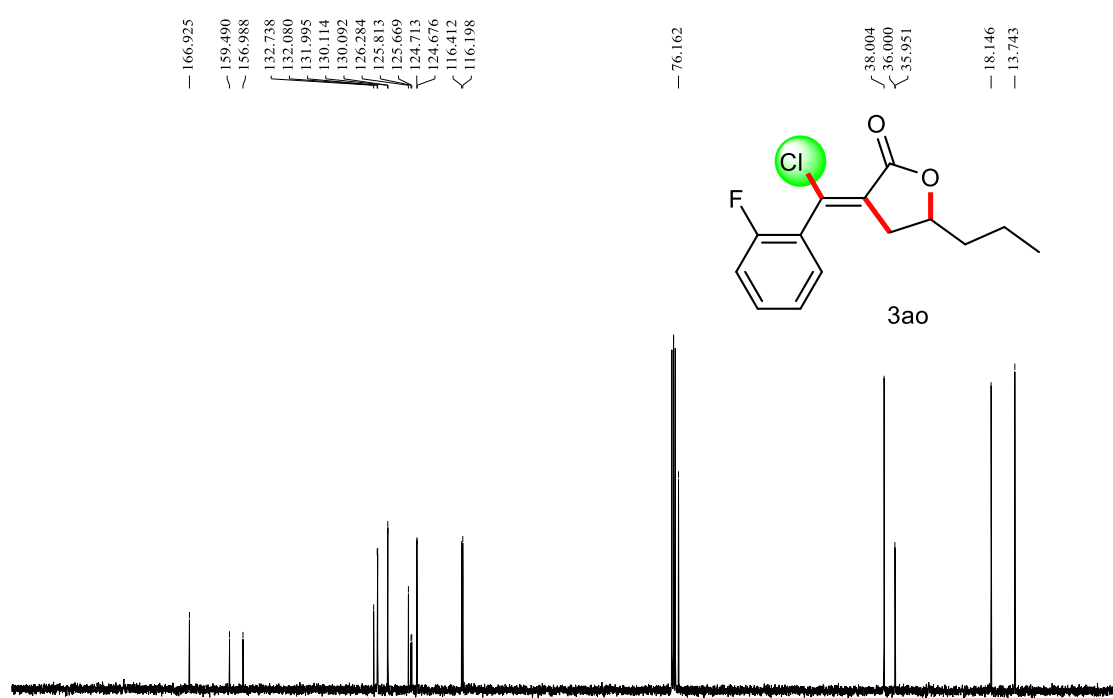

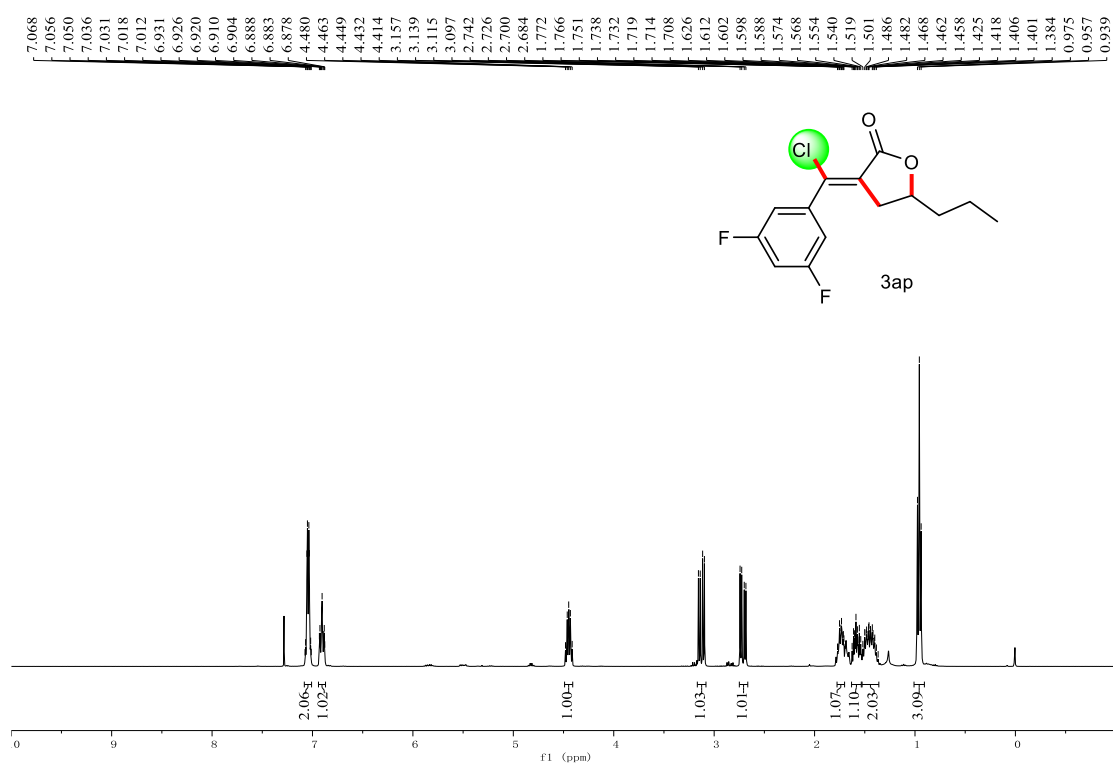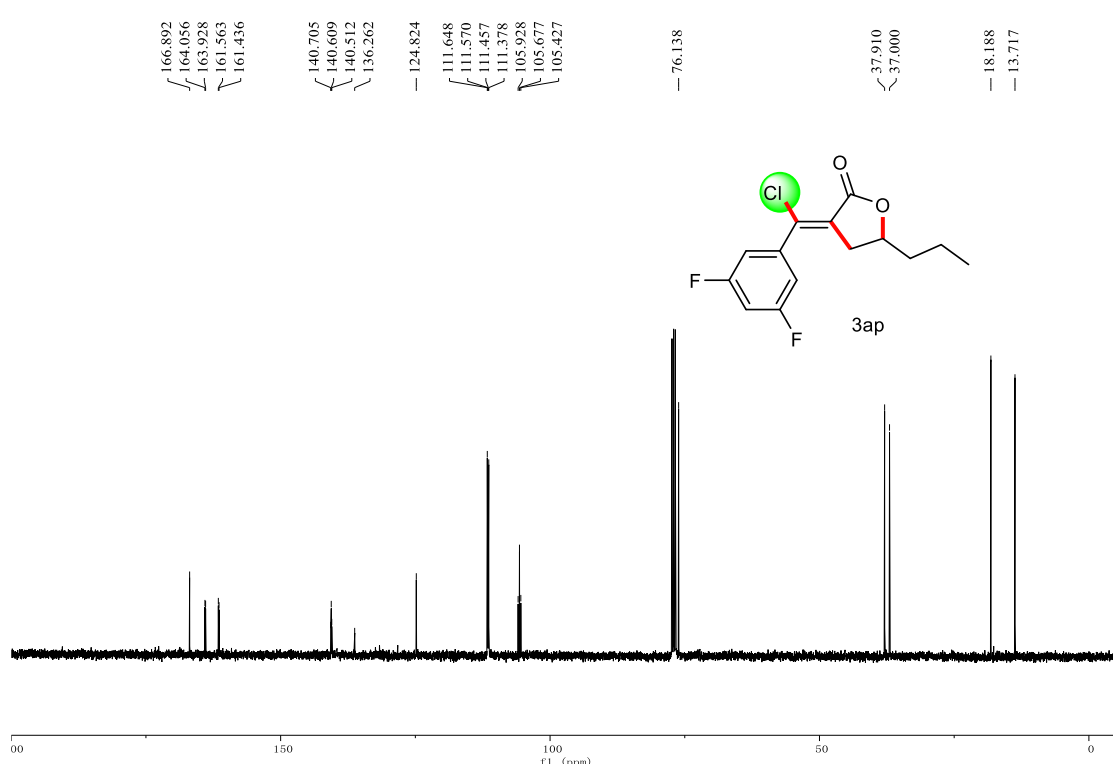

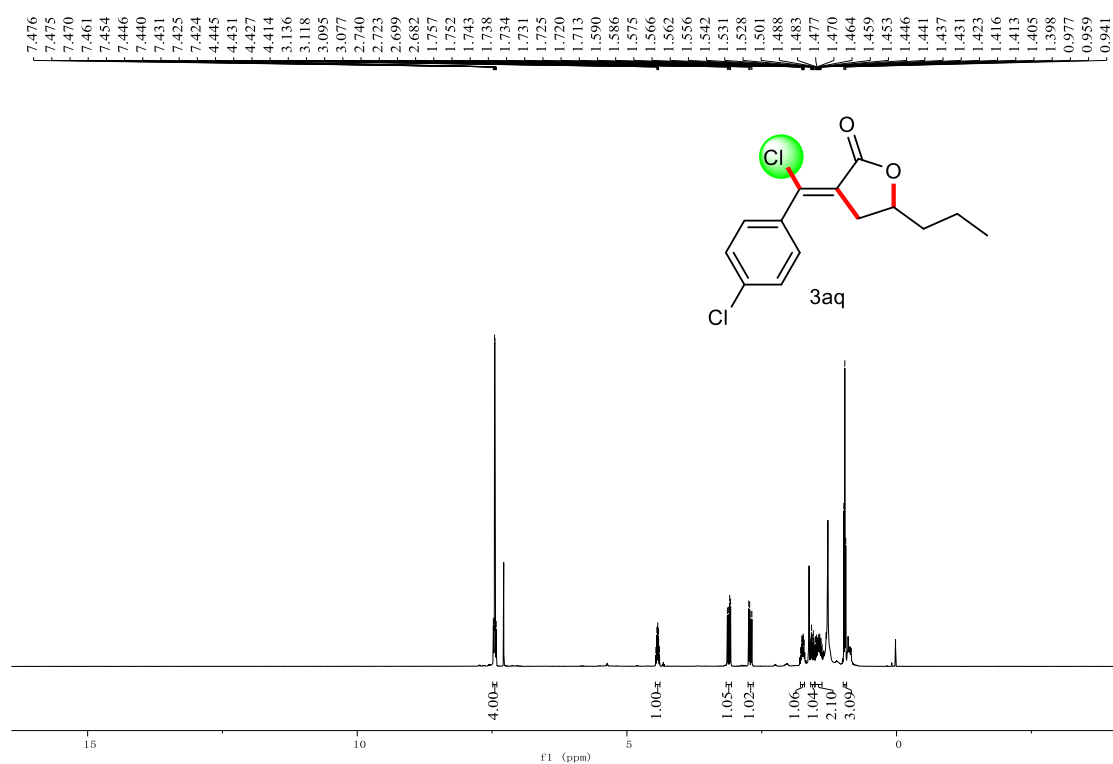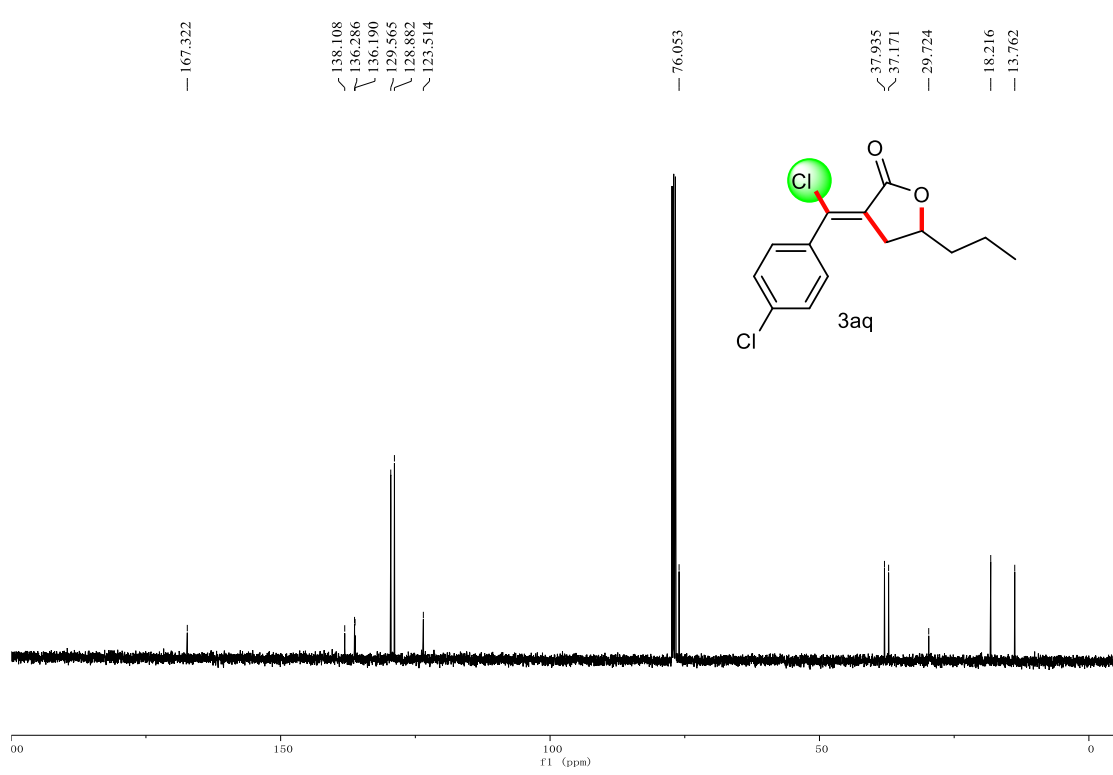

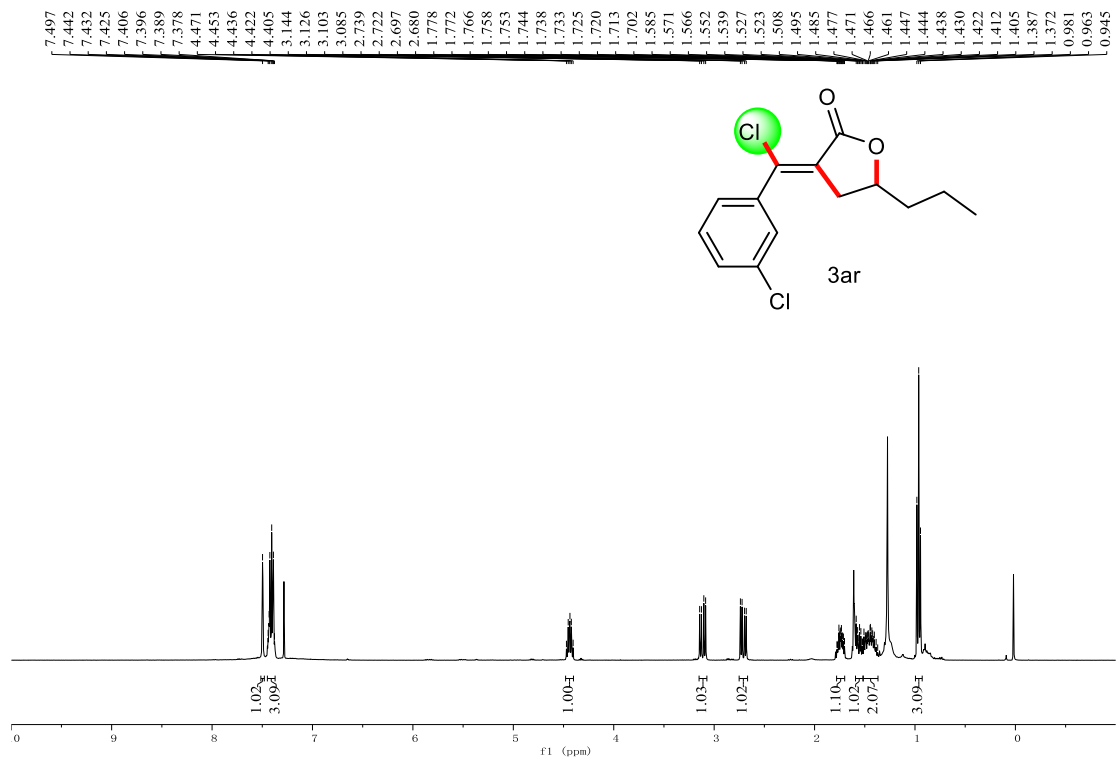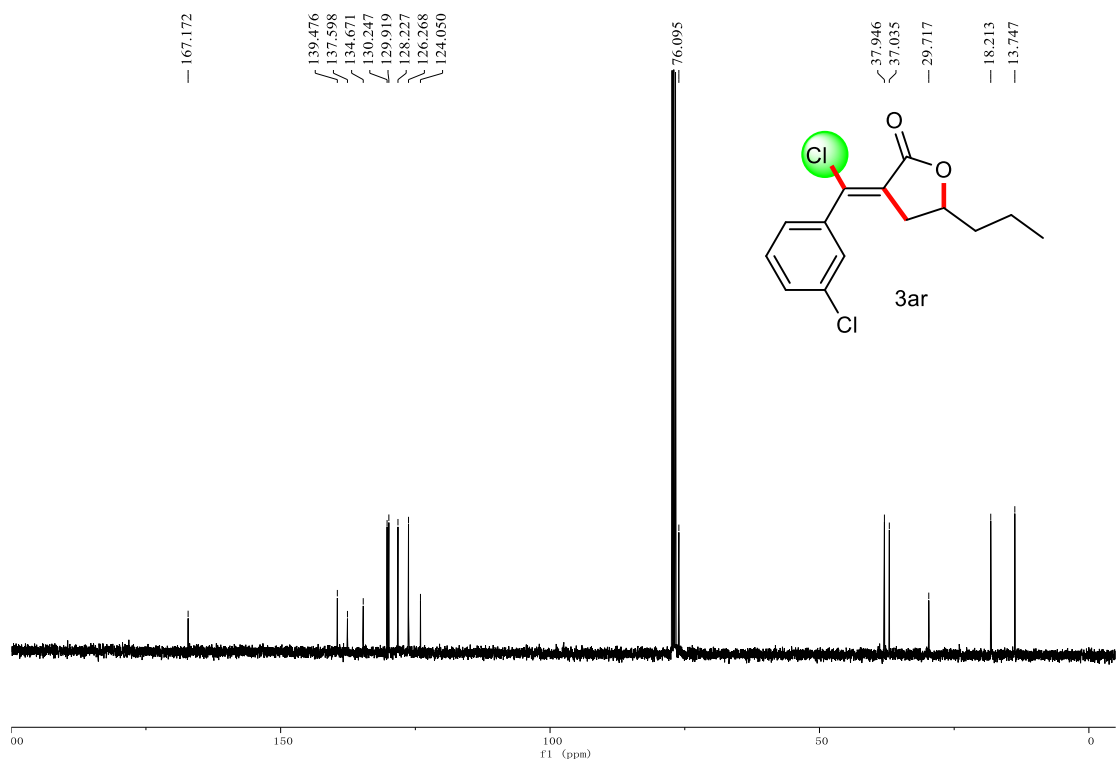

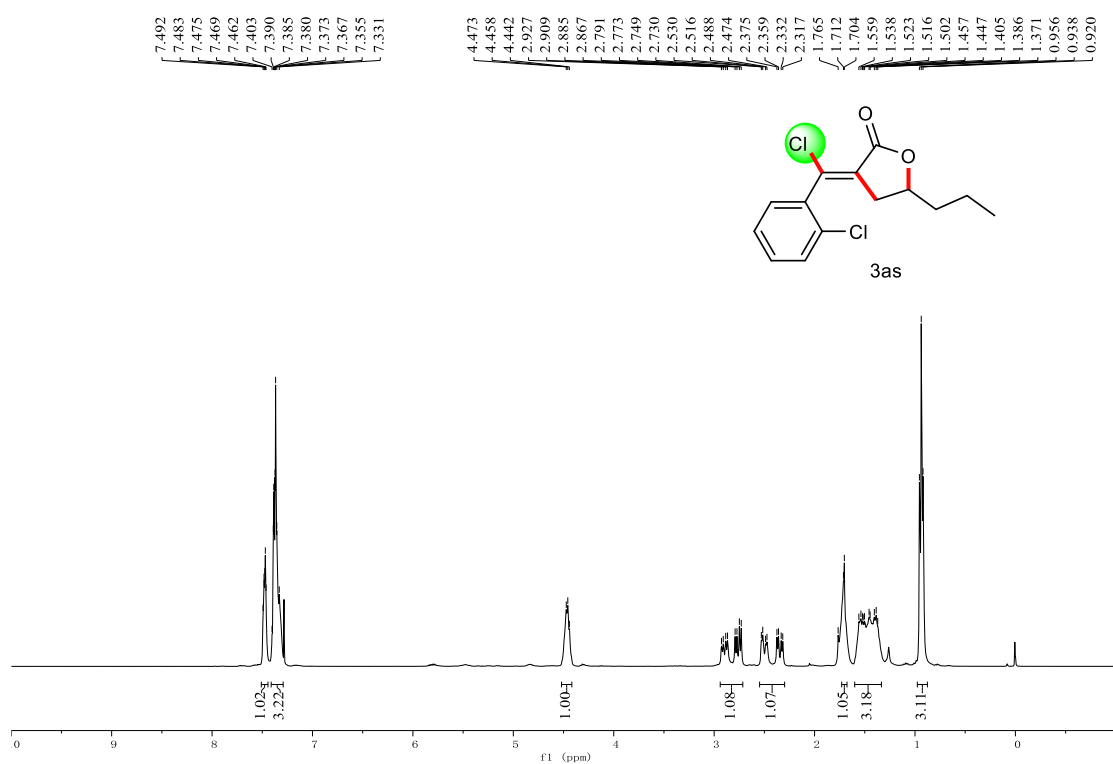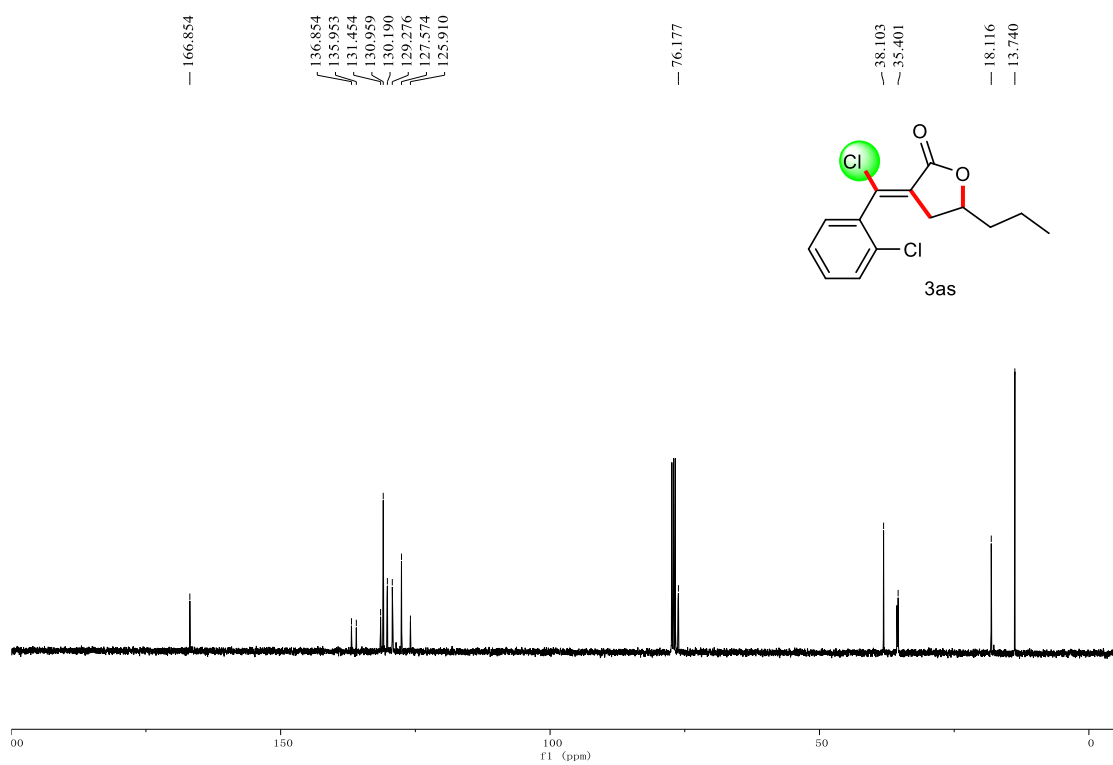



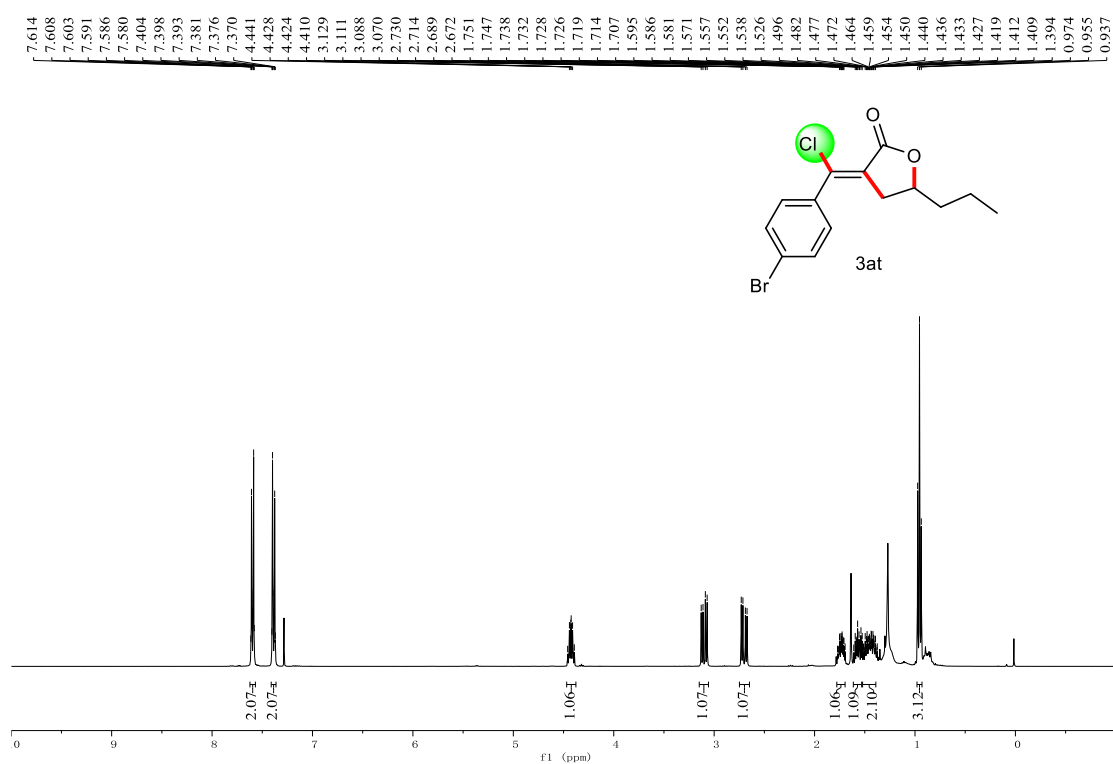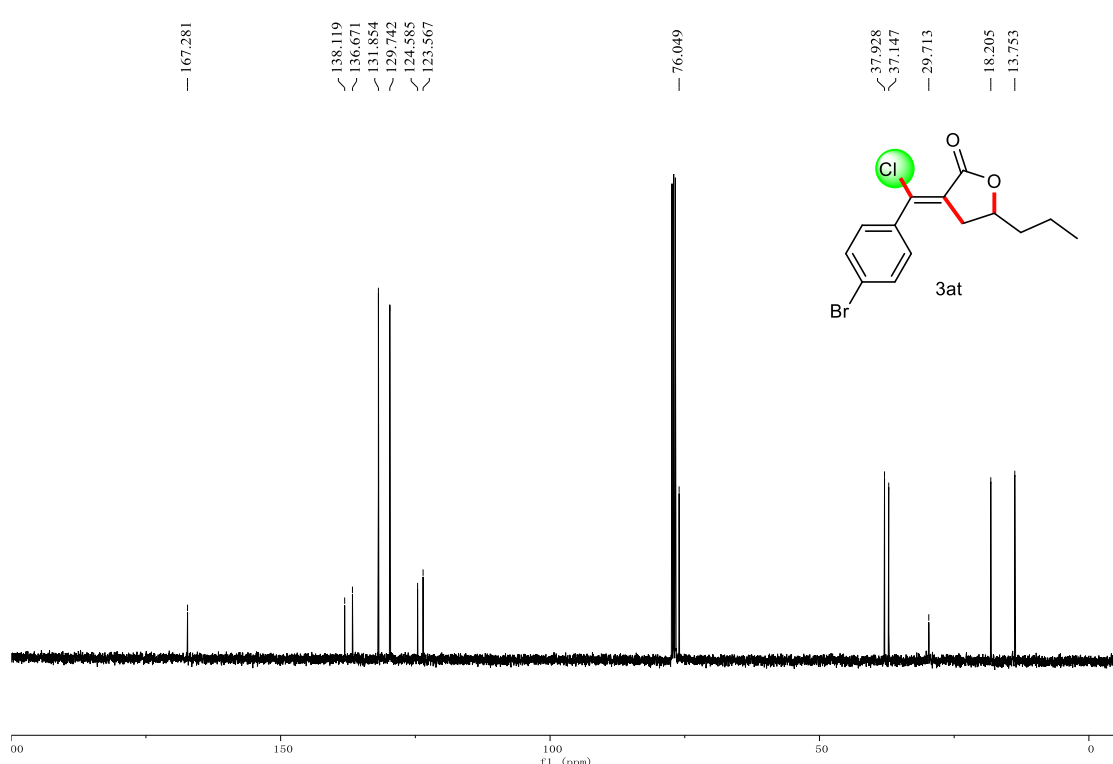

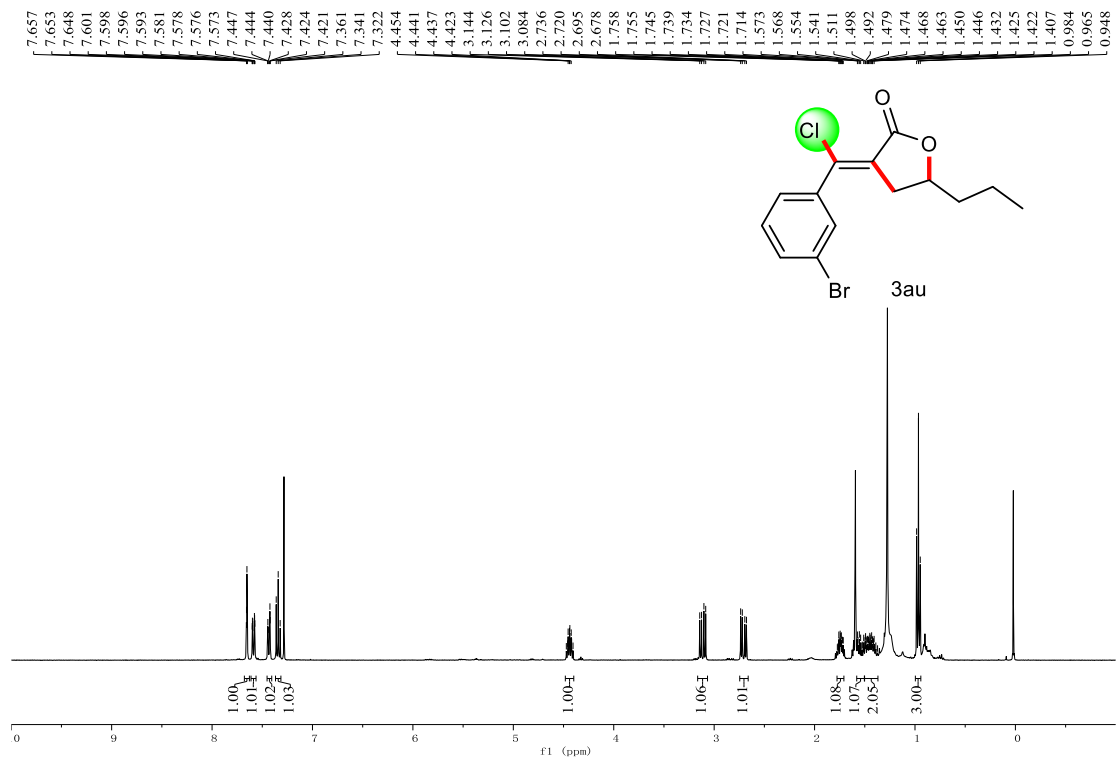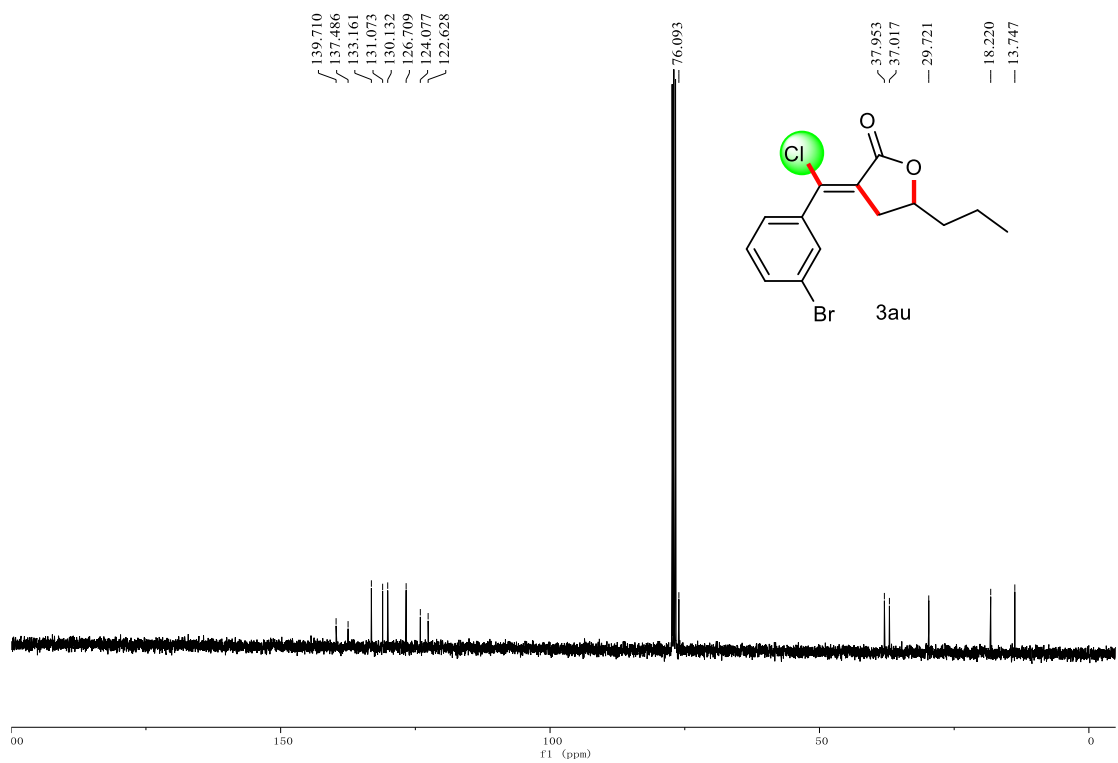

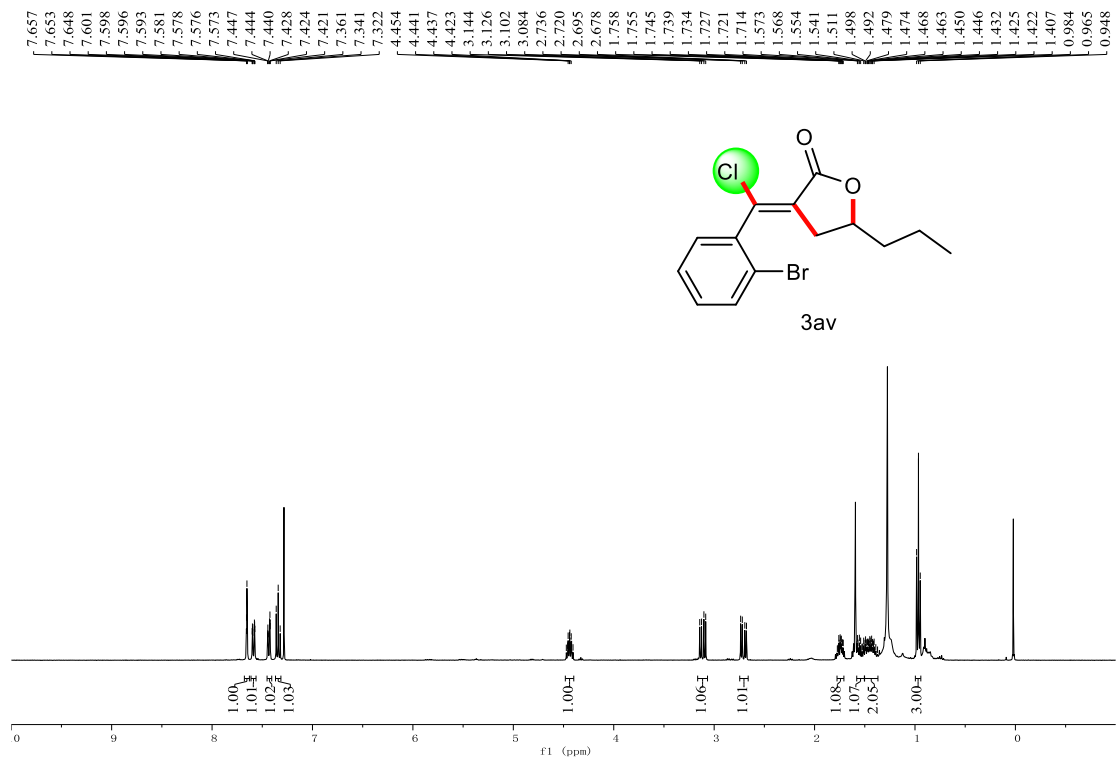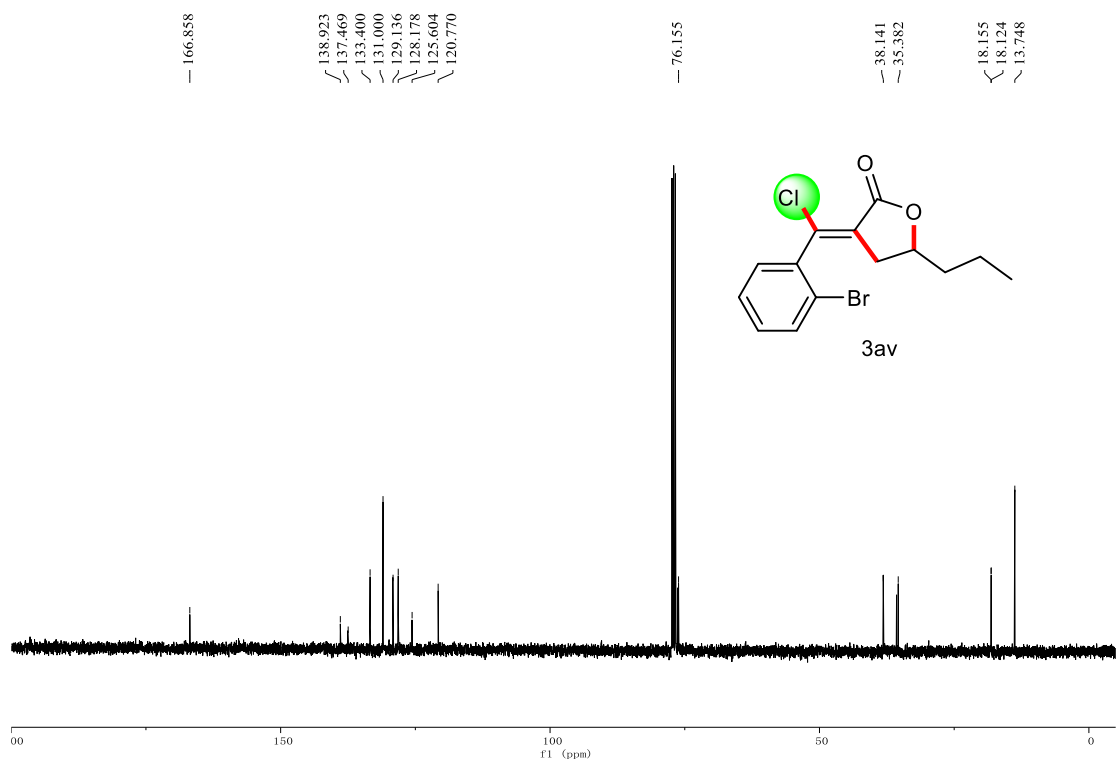

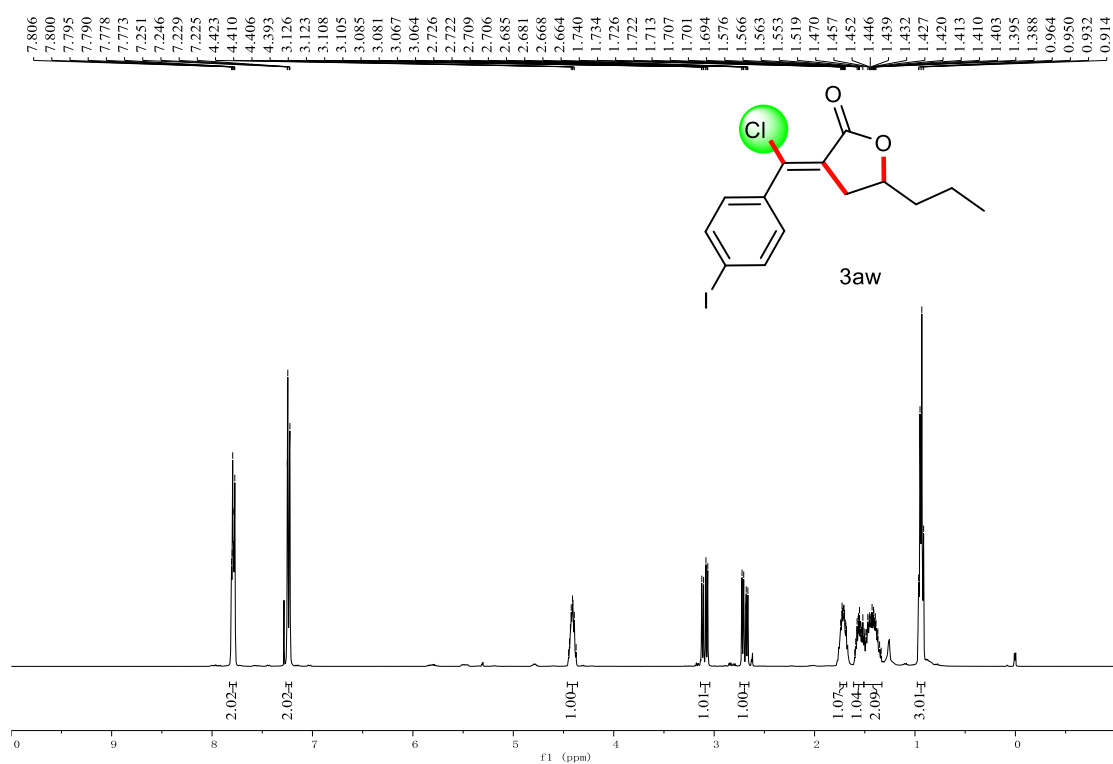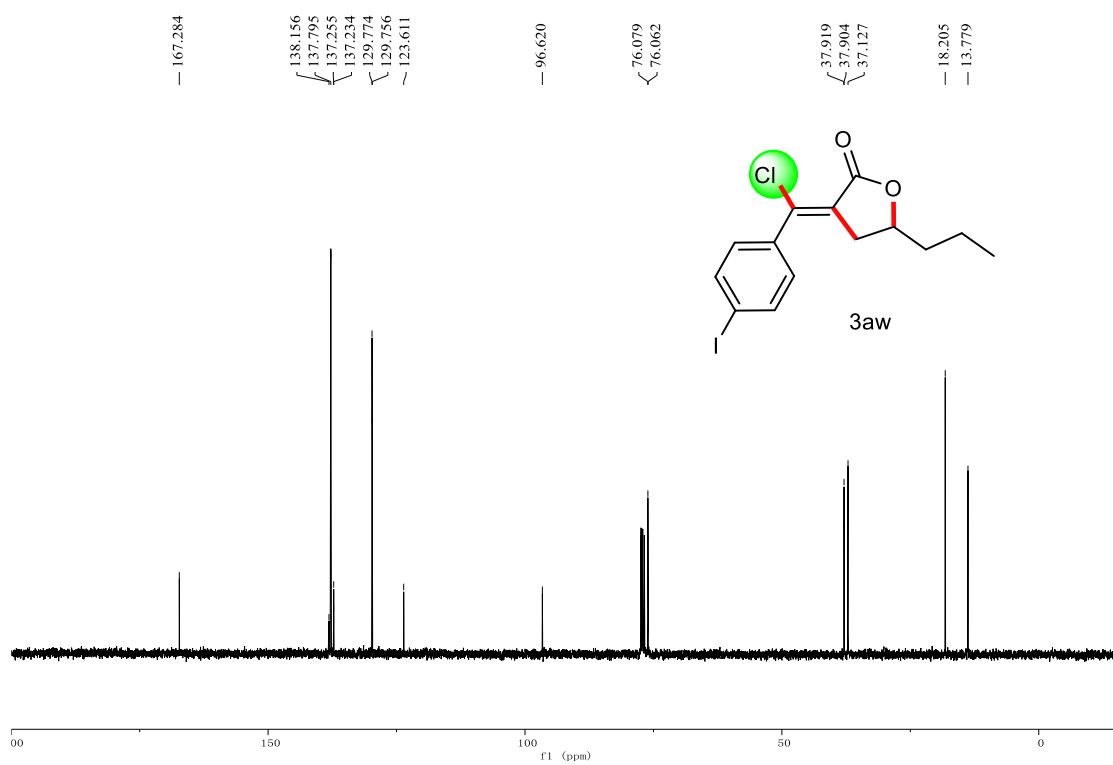

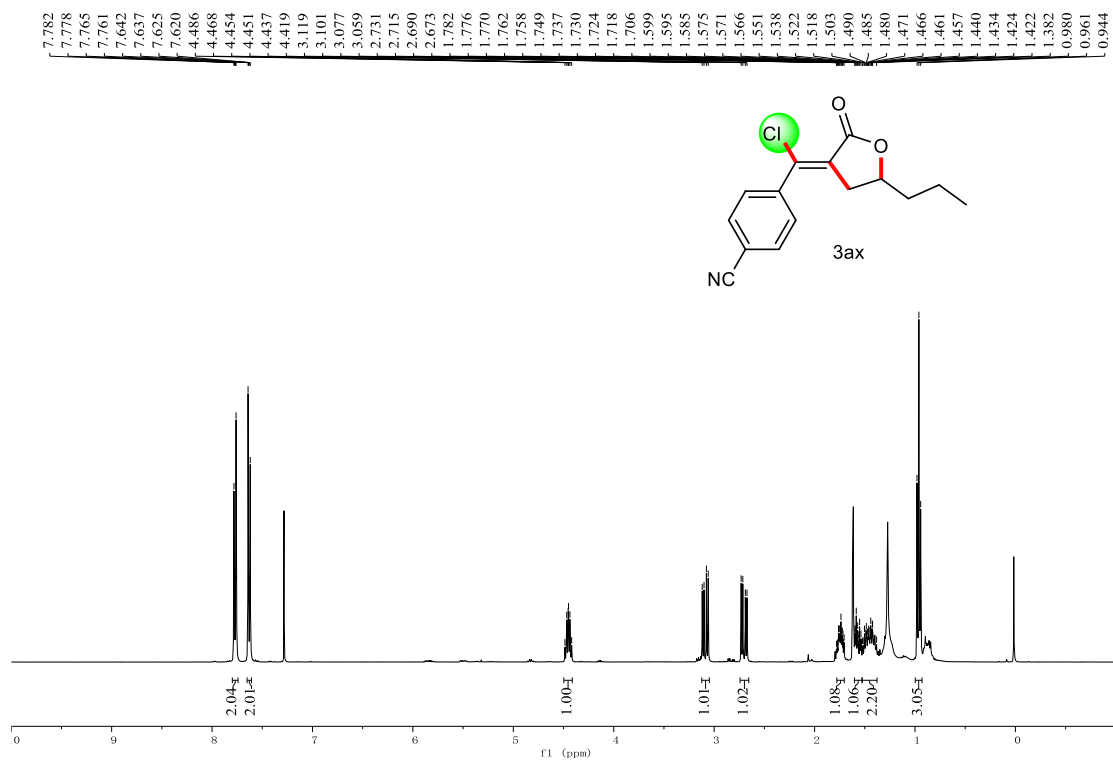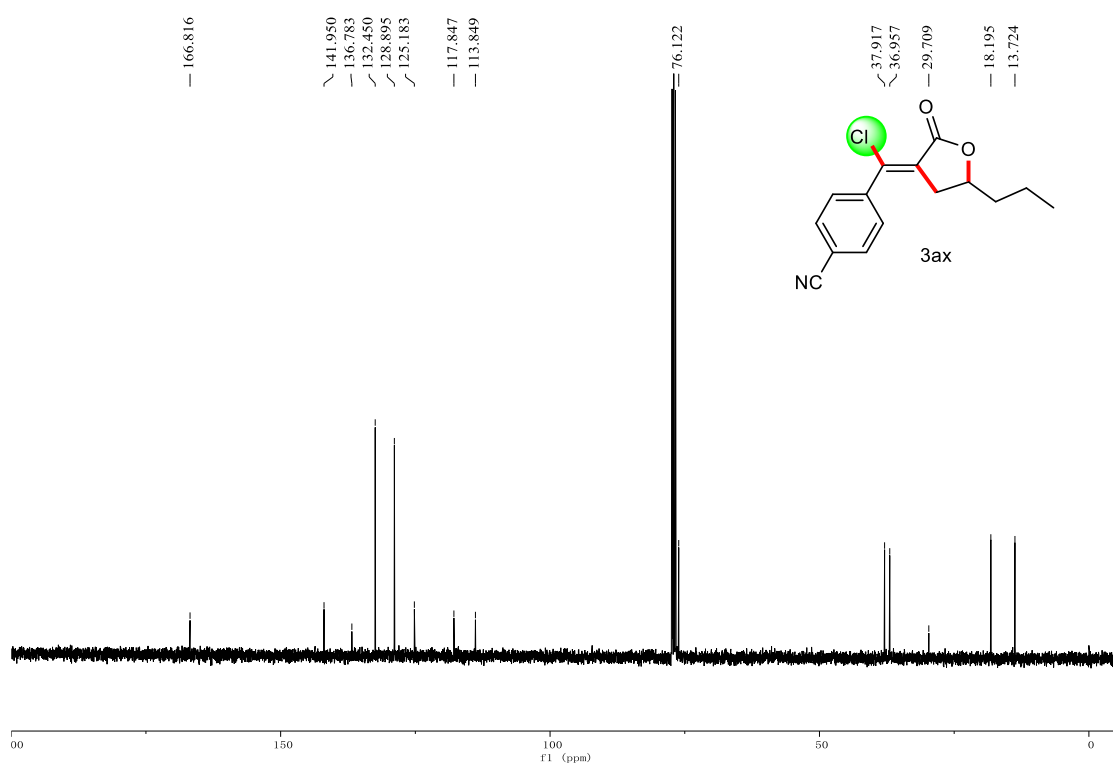

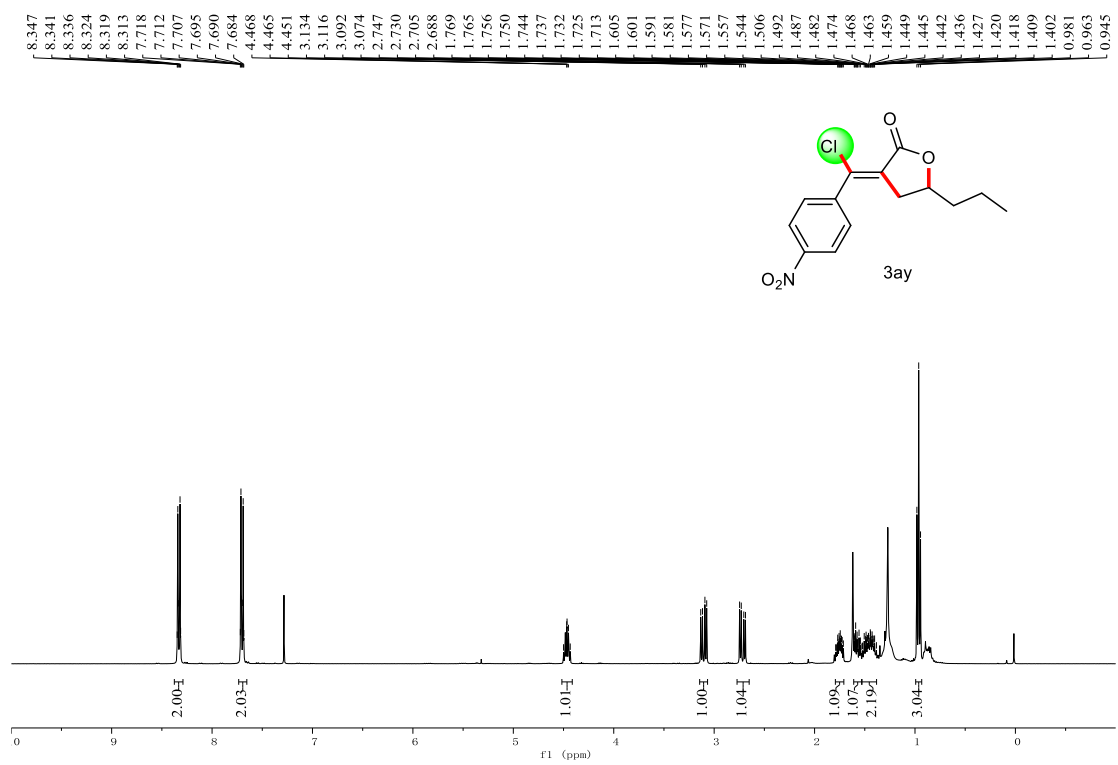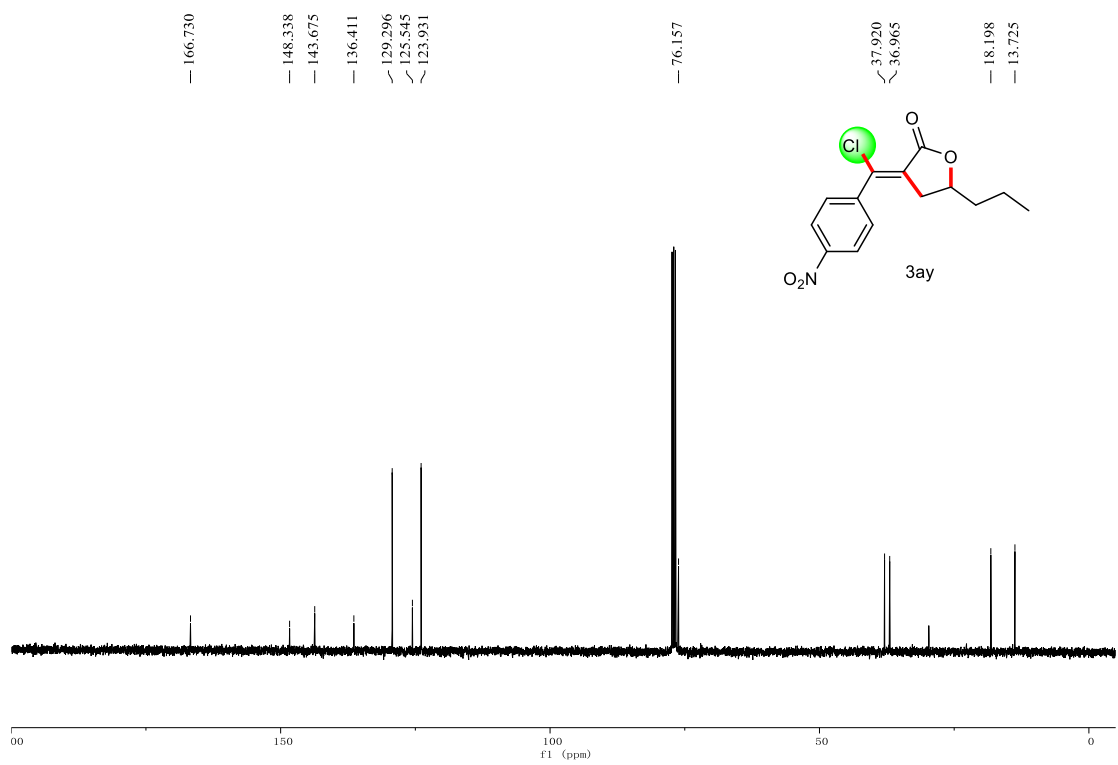

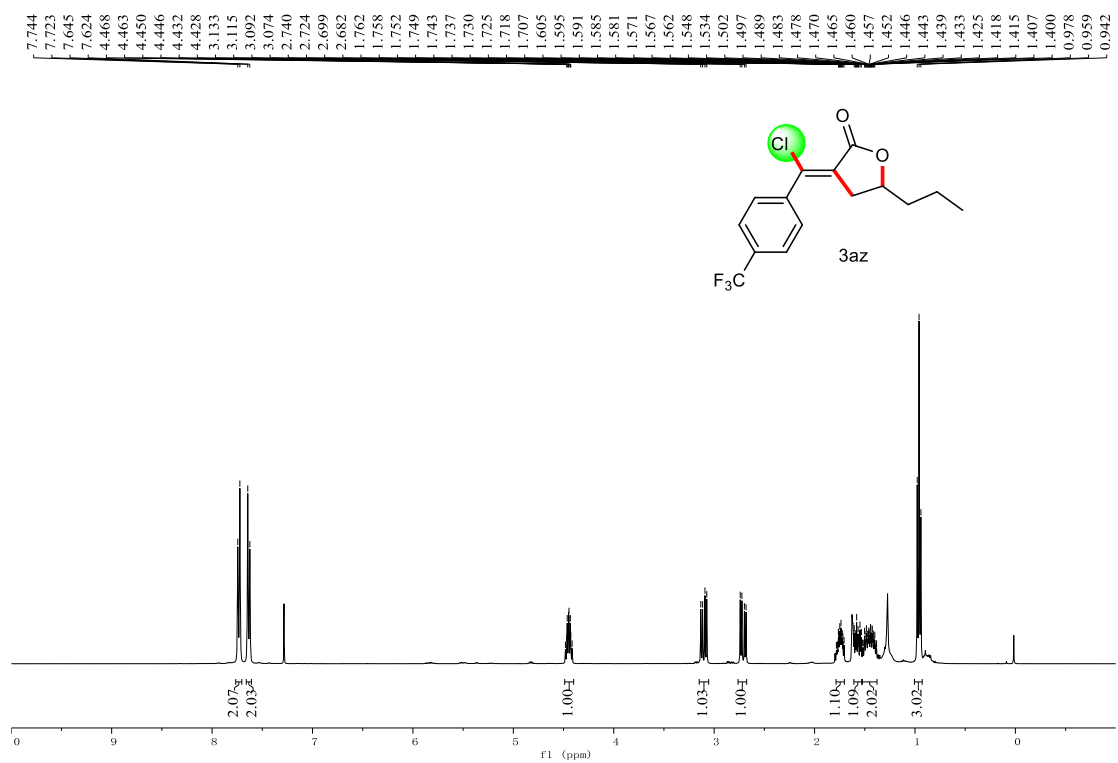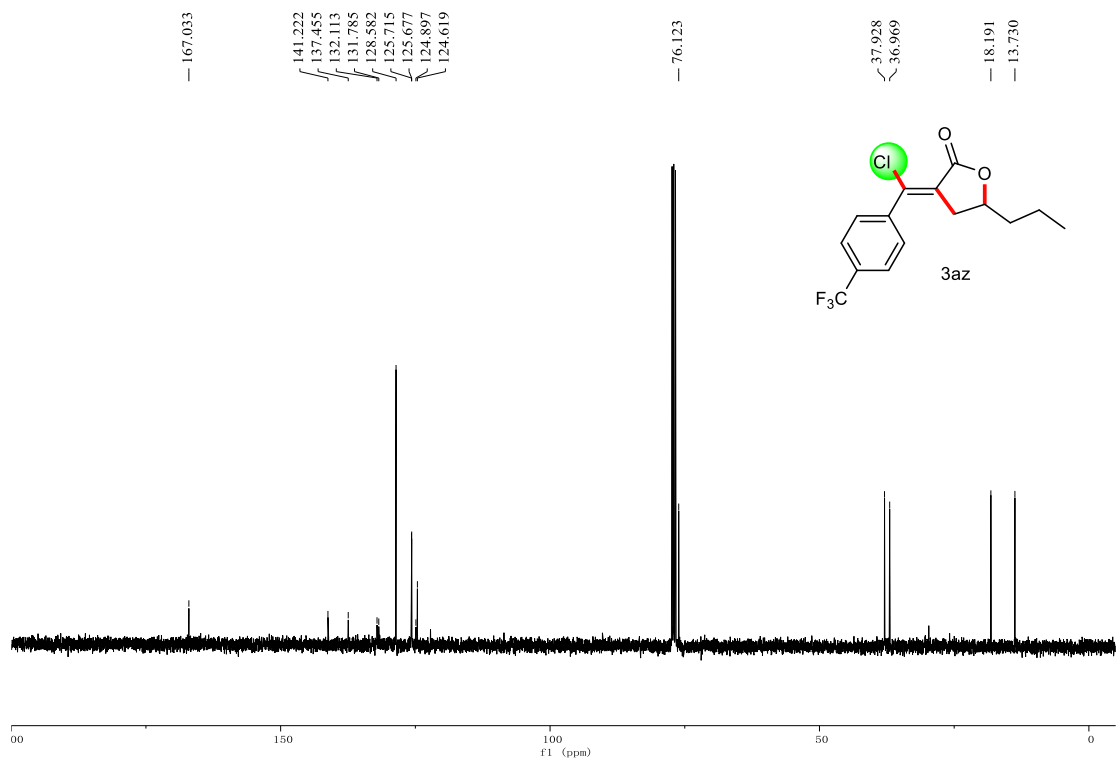

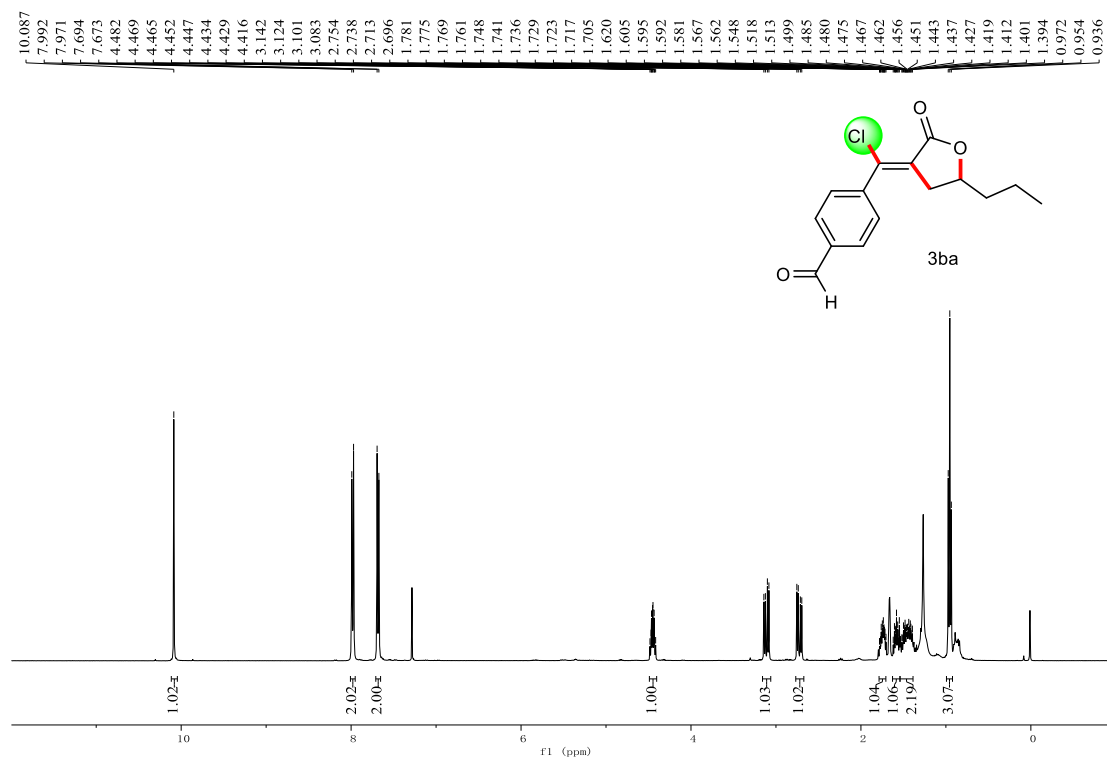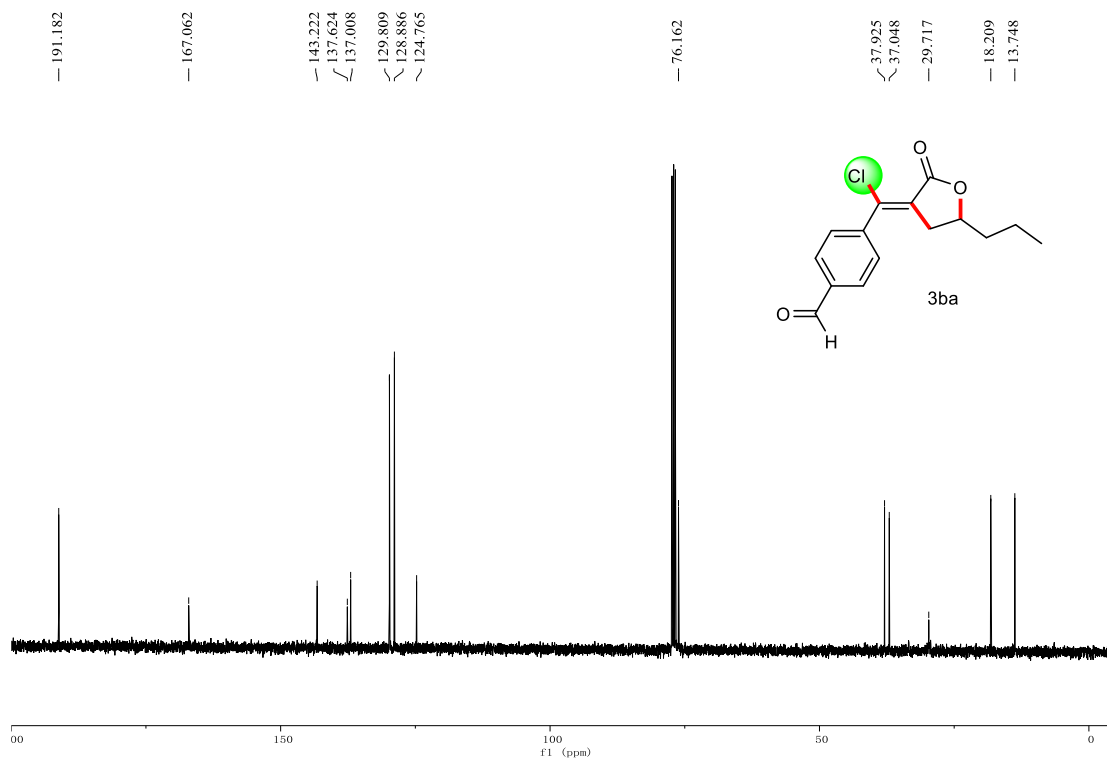



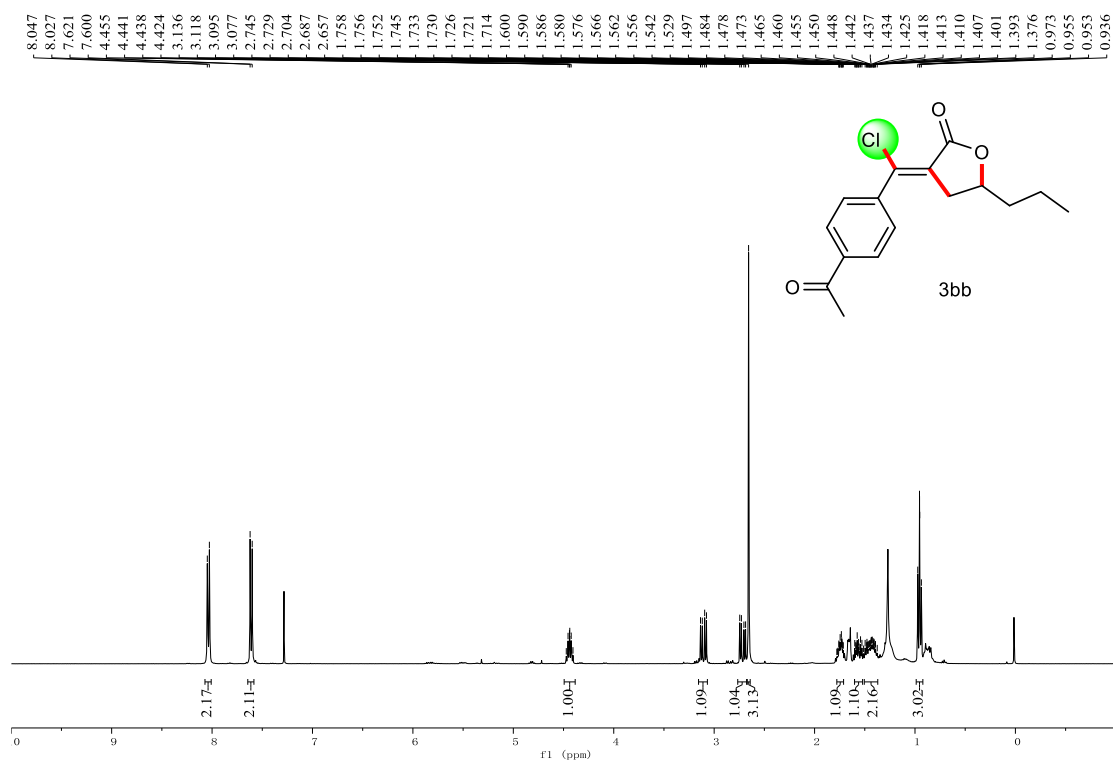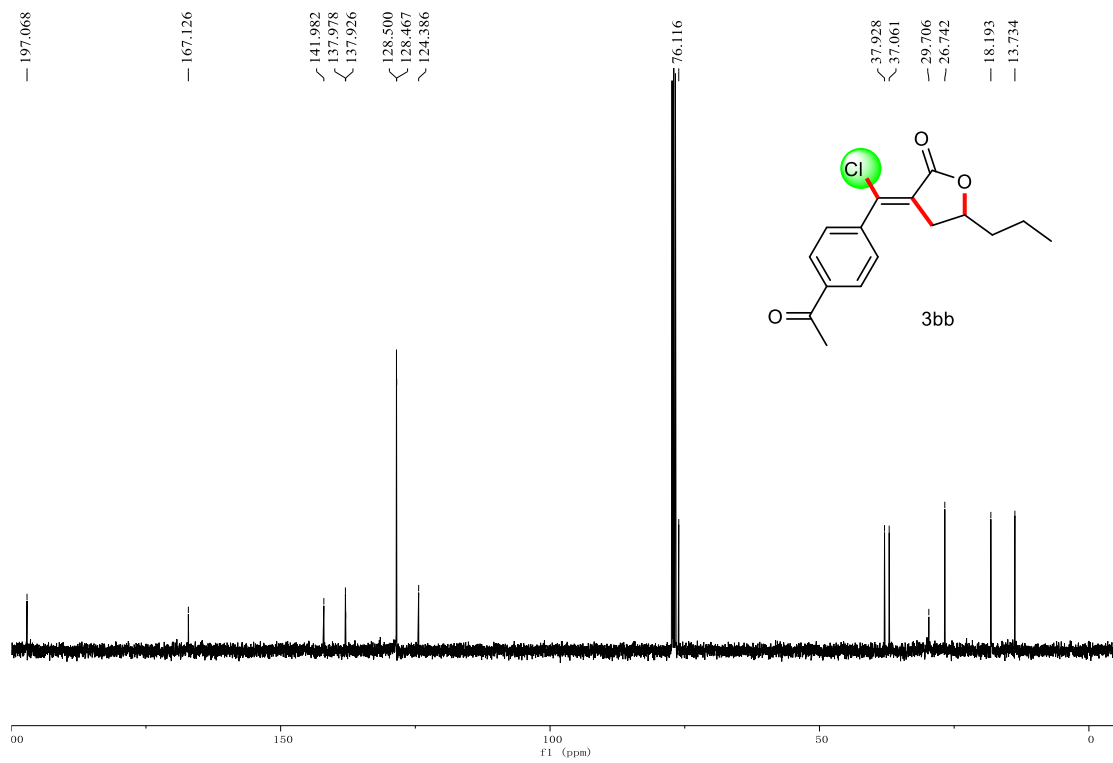

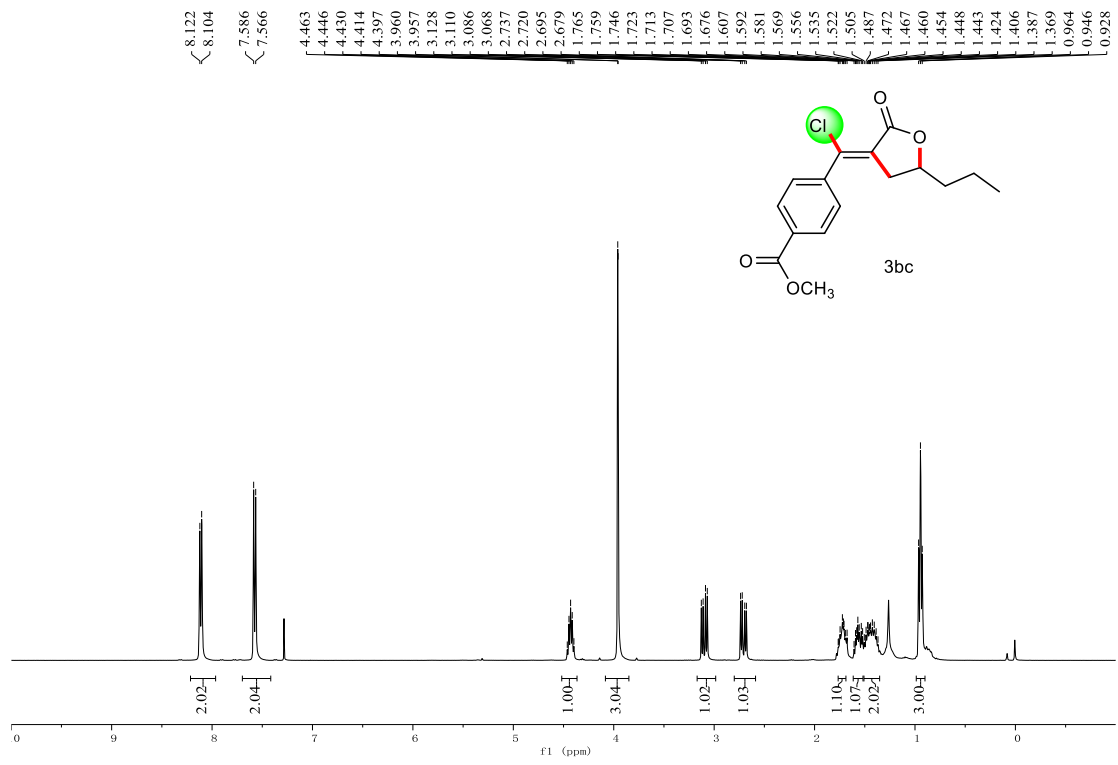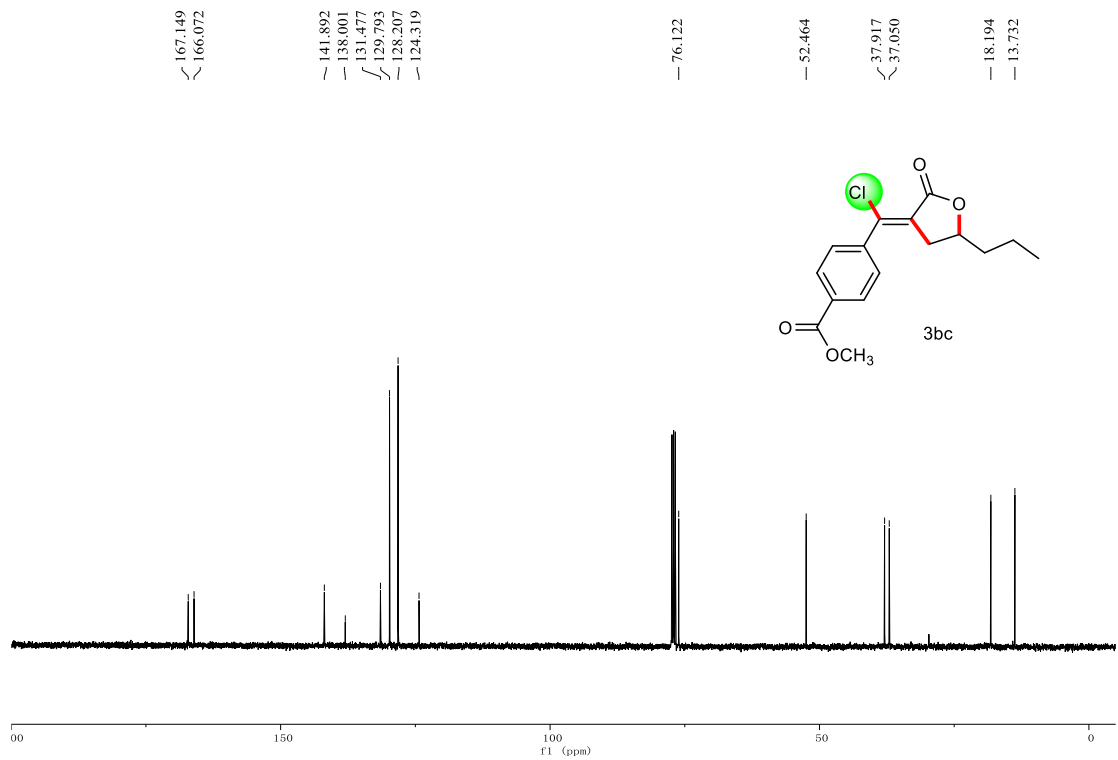

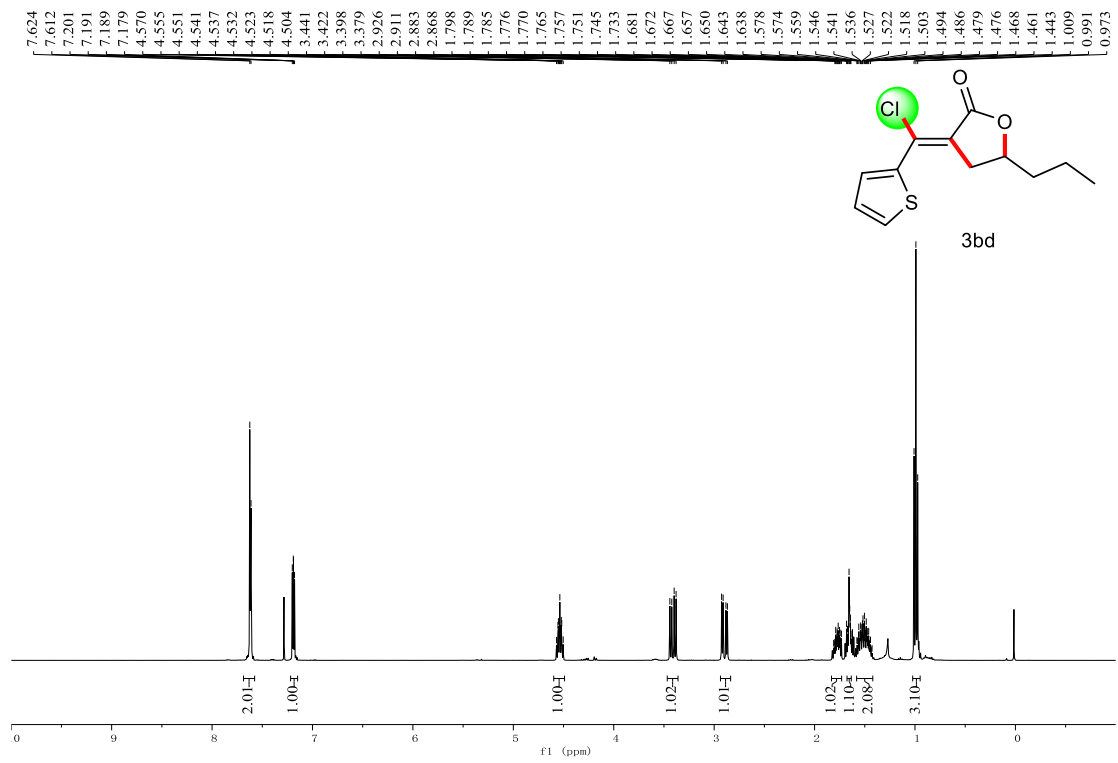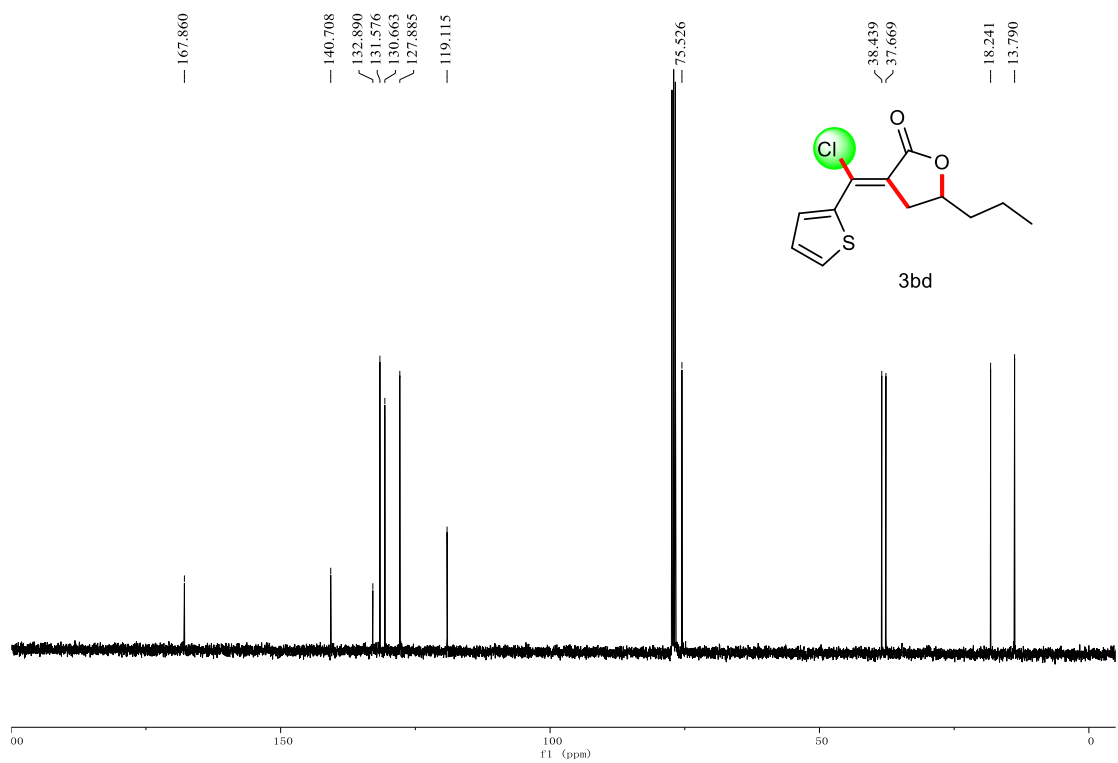

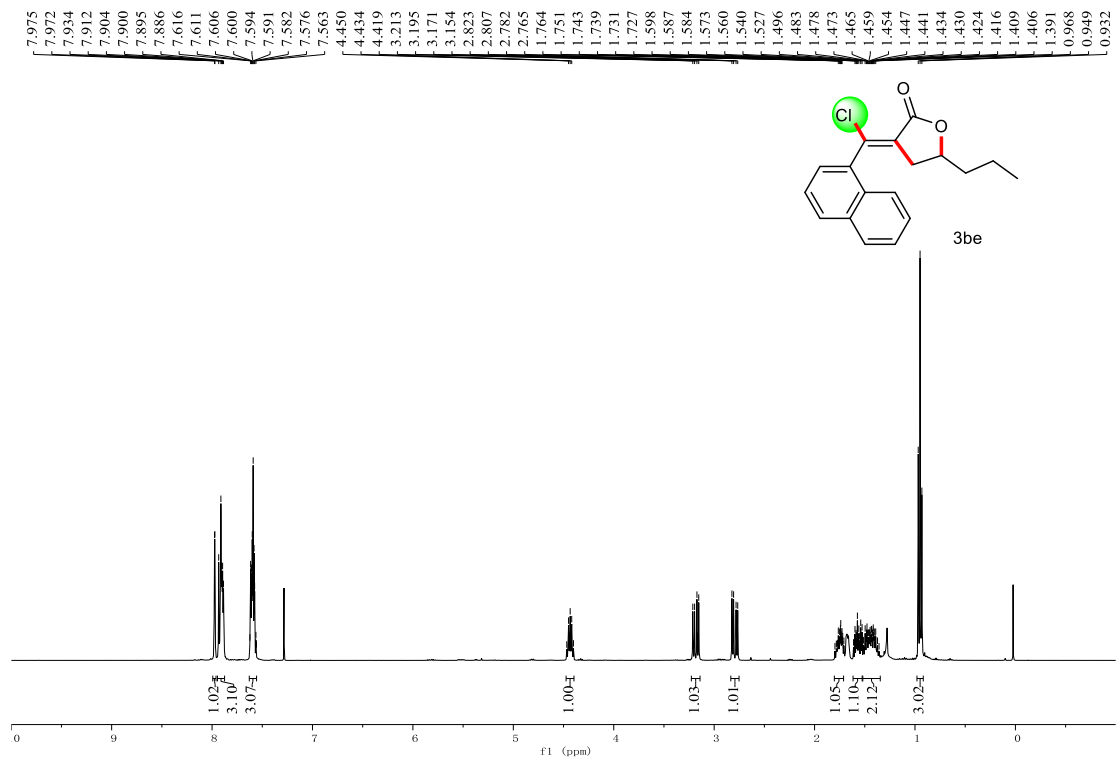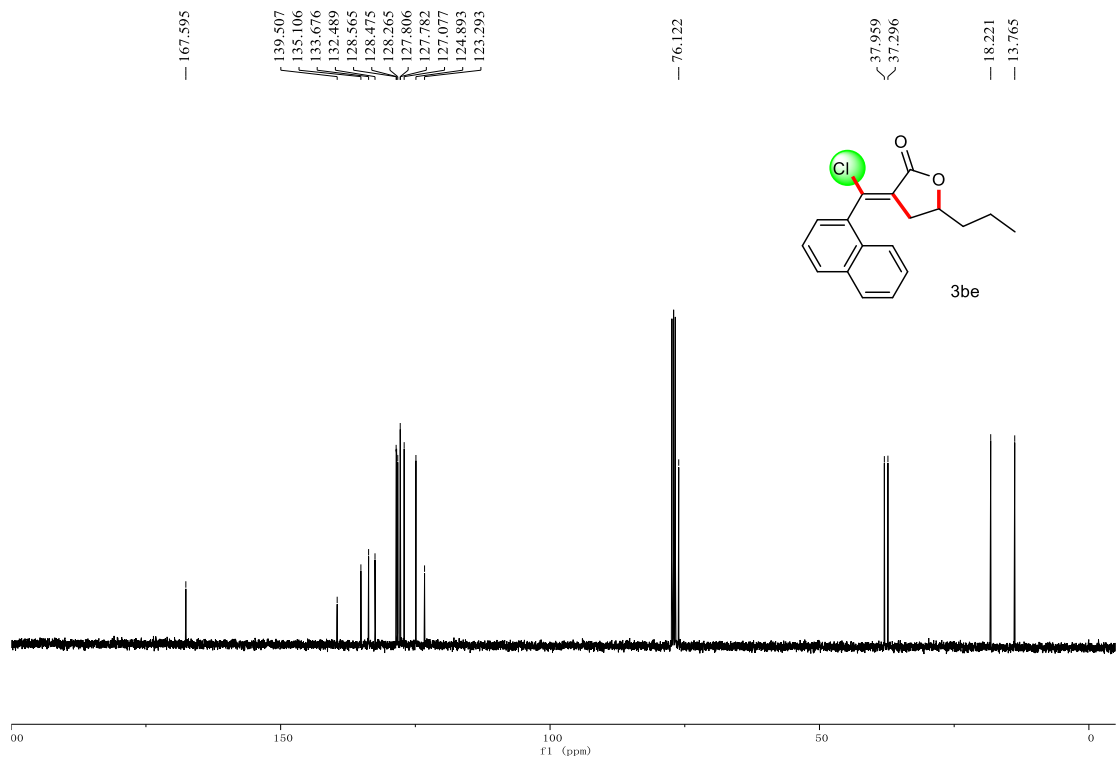

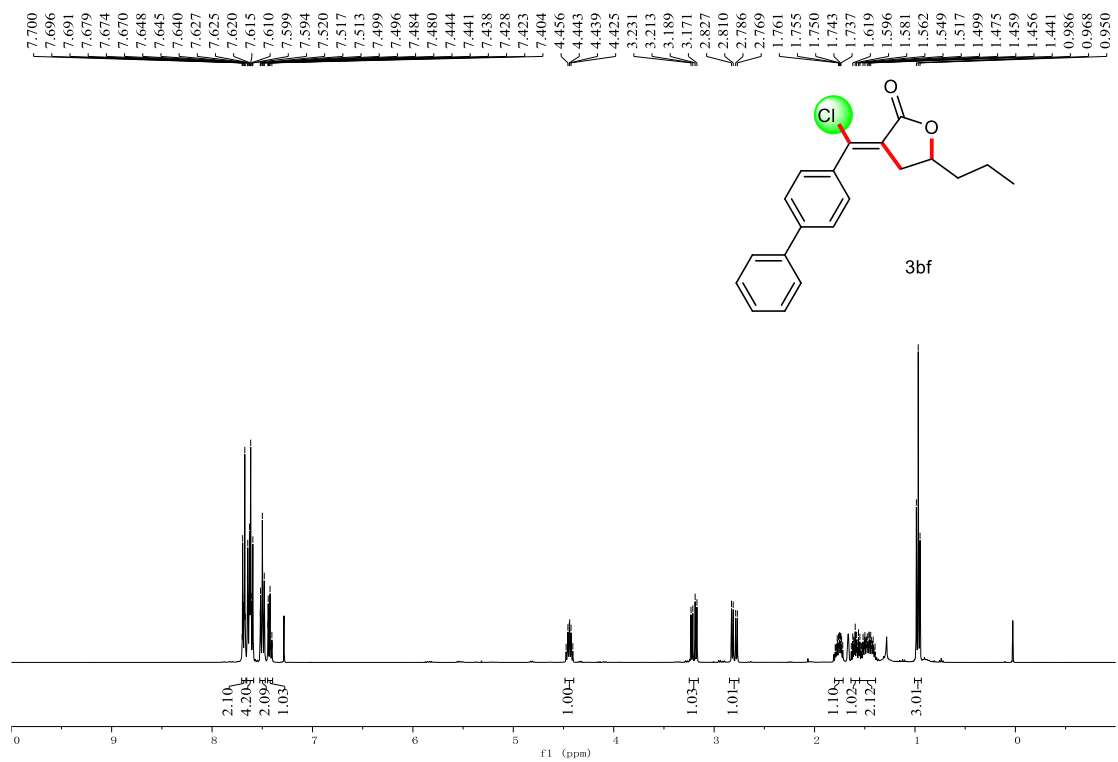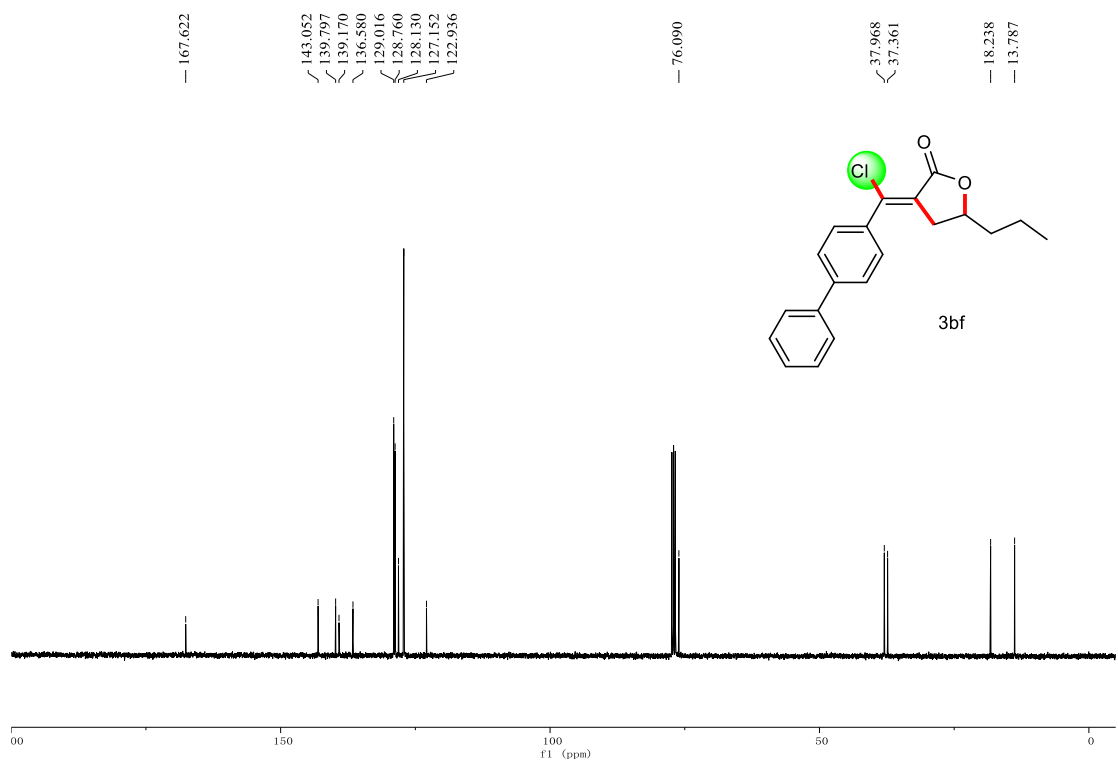

4.471  
4.468  
4.458  
4.454  
4.449  
4.439  
4.435  
3.118  
3.114  
3.099  
3.095  
3.077  
3.073  
3.058  
3.054  
2.616  
2.612  
2.601  
2.596  
2.575  
2.571  
2.560  
2.555  
2.266  
2.262  
2.257  
1.746  
1.730  
1.725  
1.712  
1.706  
1.700  
1.688  
1.681  
1.607  
1.597  
1.593  
1.583  
1.569  
1.564  
1.550  
1.538  
1.507  
1.494  
1.489  
1.475  
1.470  
1.465  
1.459  
1.446  
1.442  
1.428  
1.421  
1.418  
1.403  
0.975  
0.968  
0.950  
0.939  
0.932

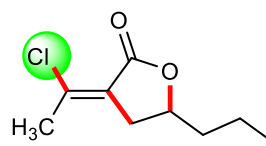

3bg

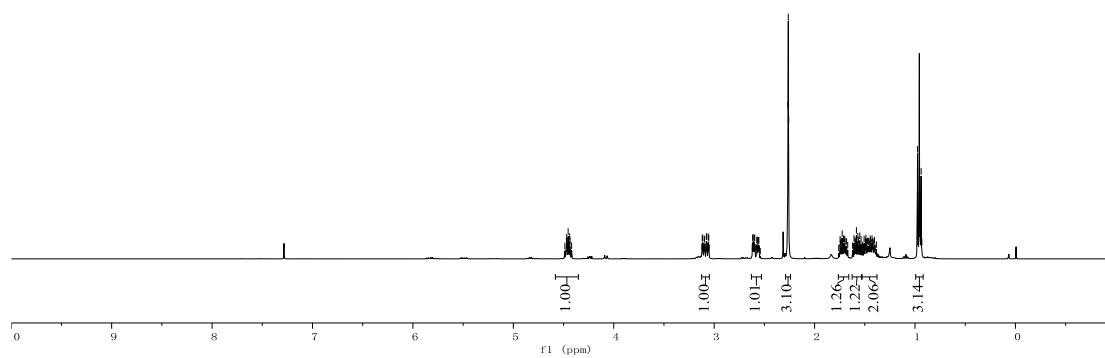

166.984

139.504

121.311

75.476

38.364

34.839

26.417

18.180

13.761

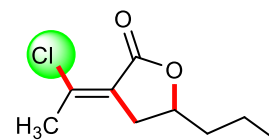

3bg

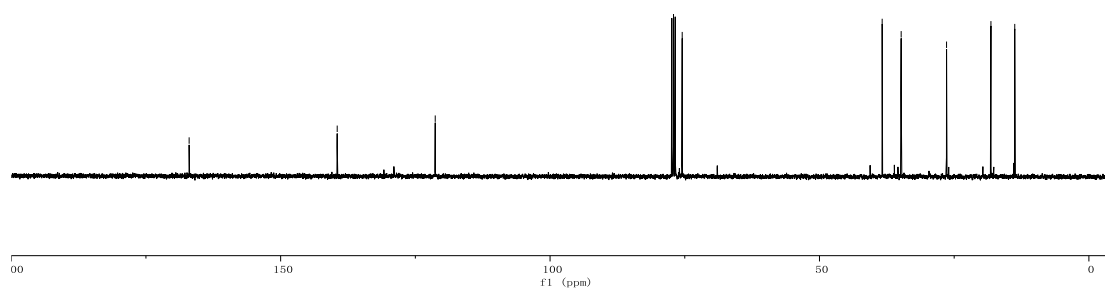

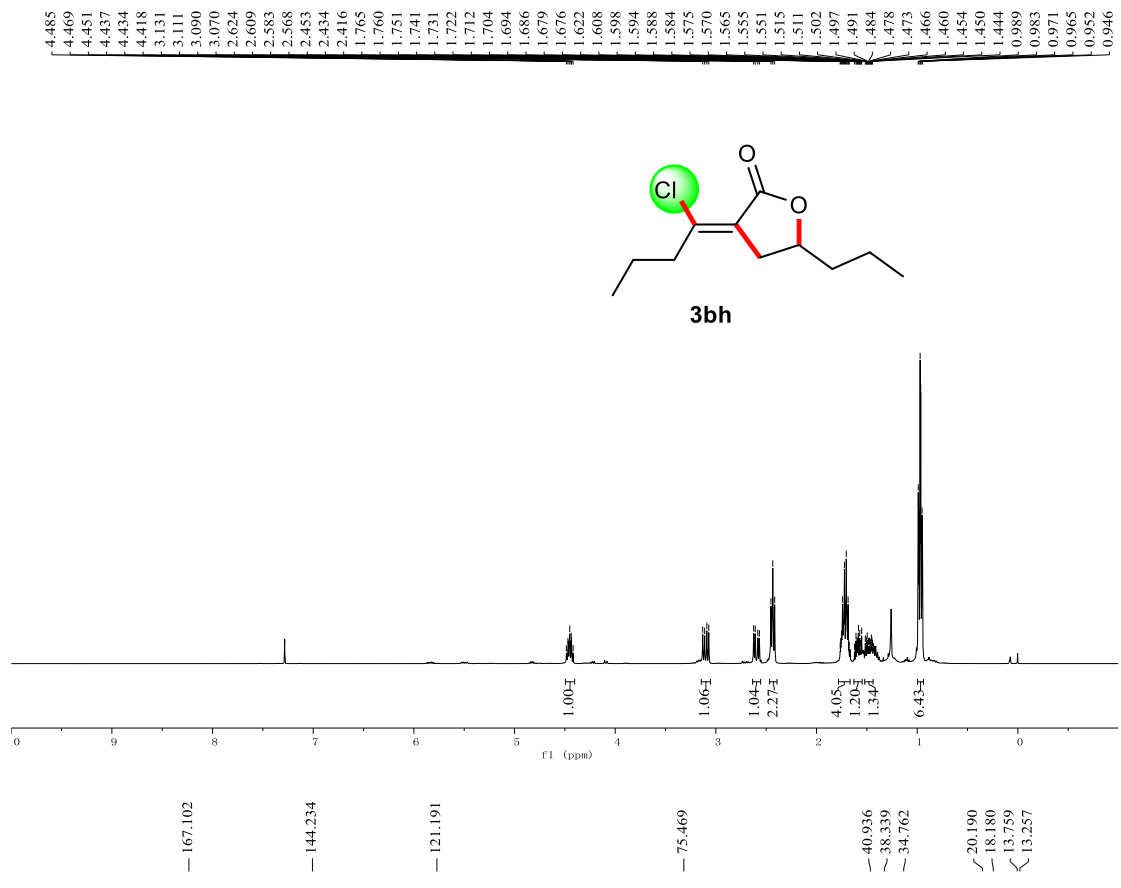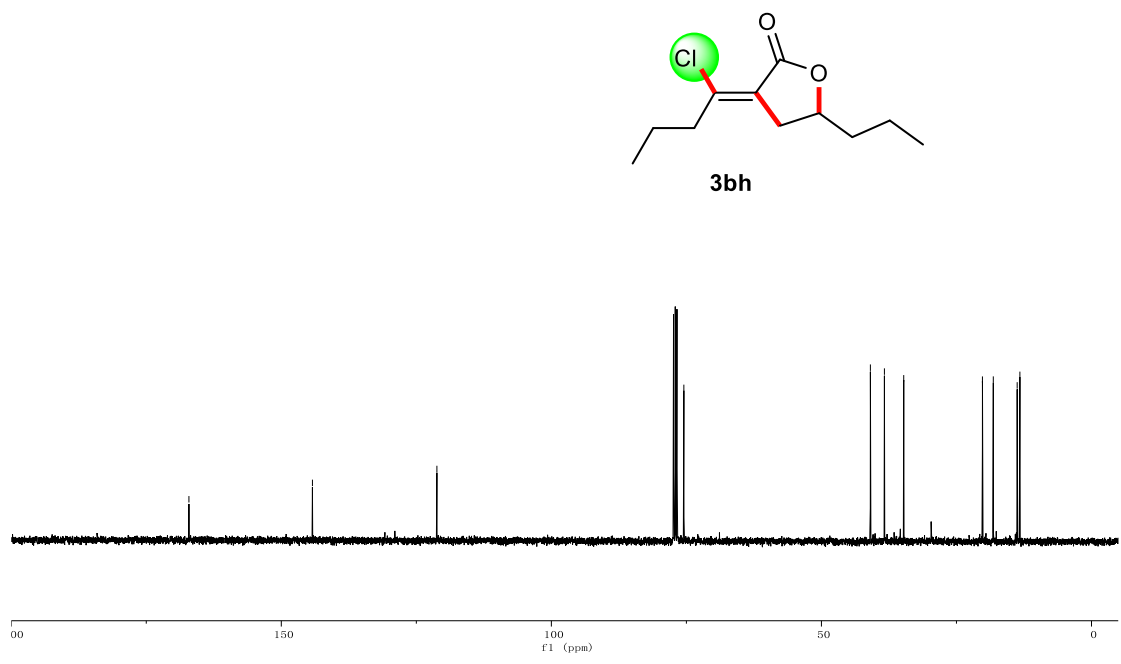

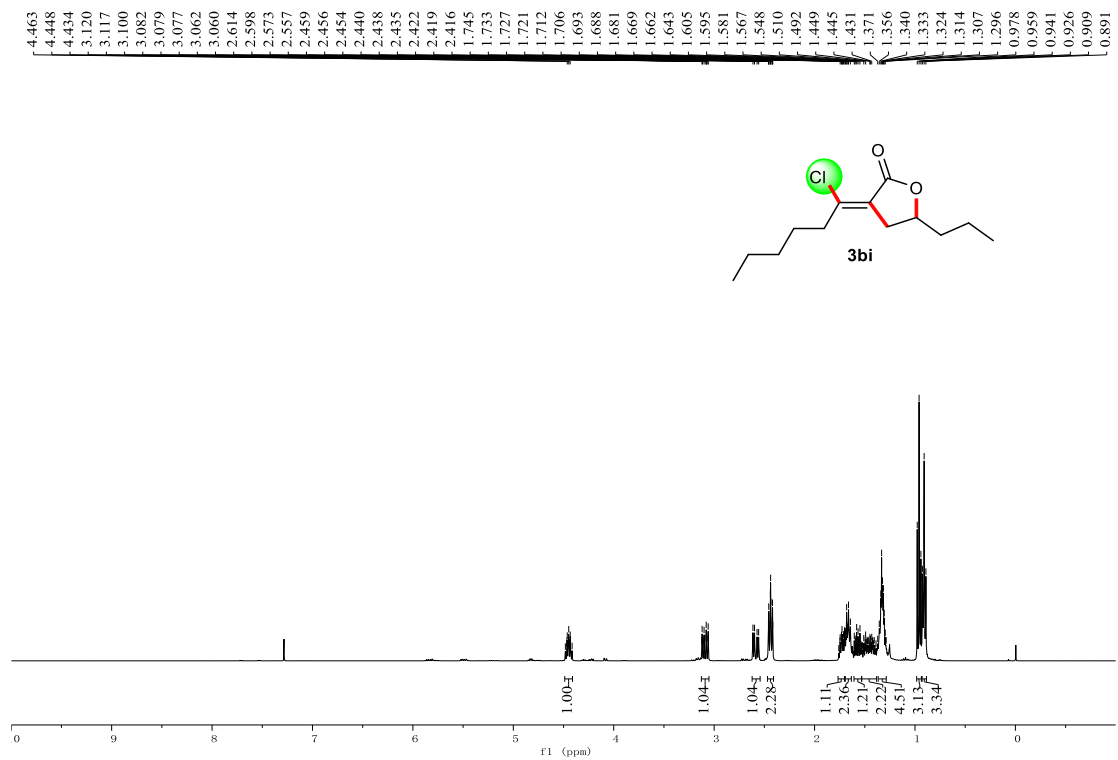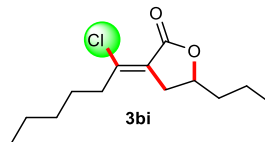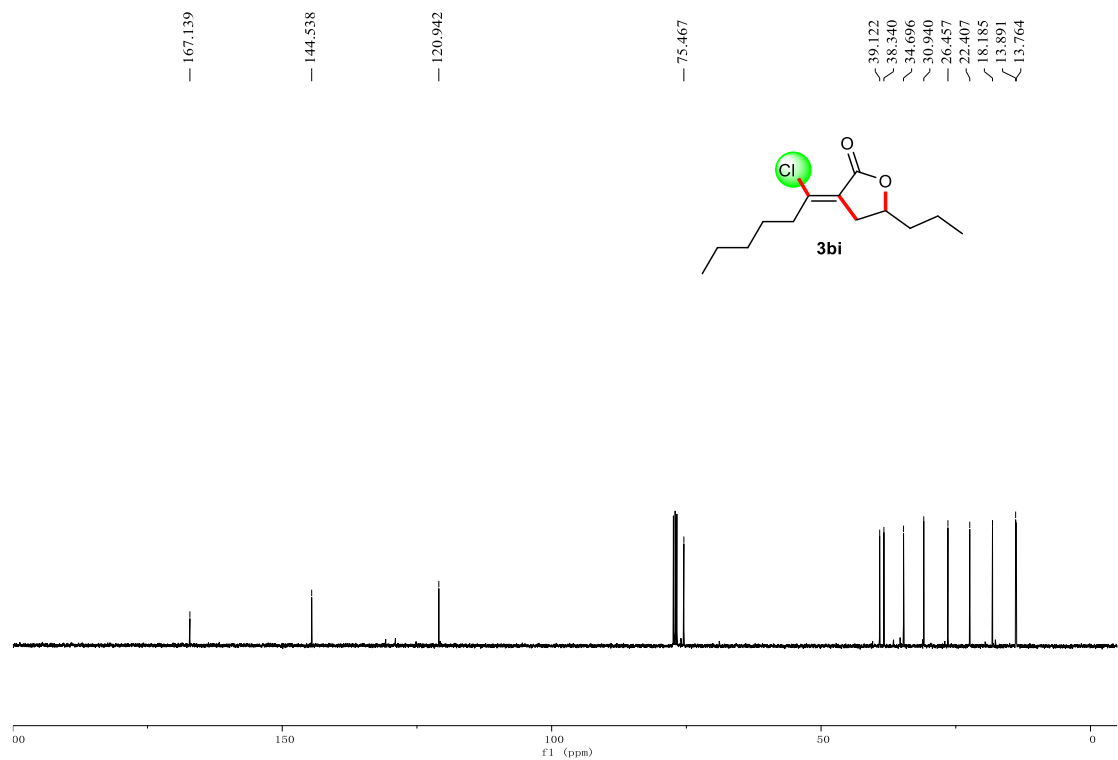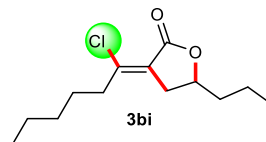



# <sup>1</sup>H and <sup>13</sup>C NMR spectra of compounds 4

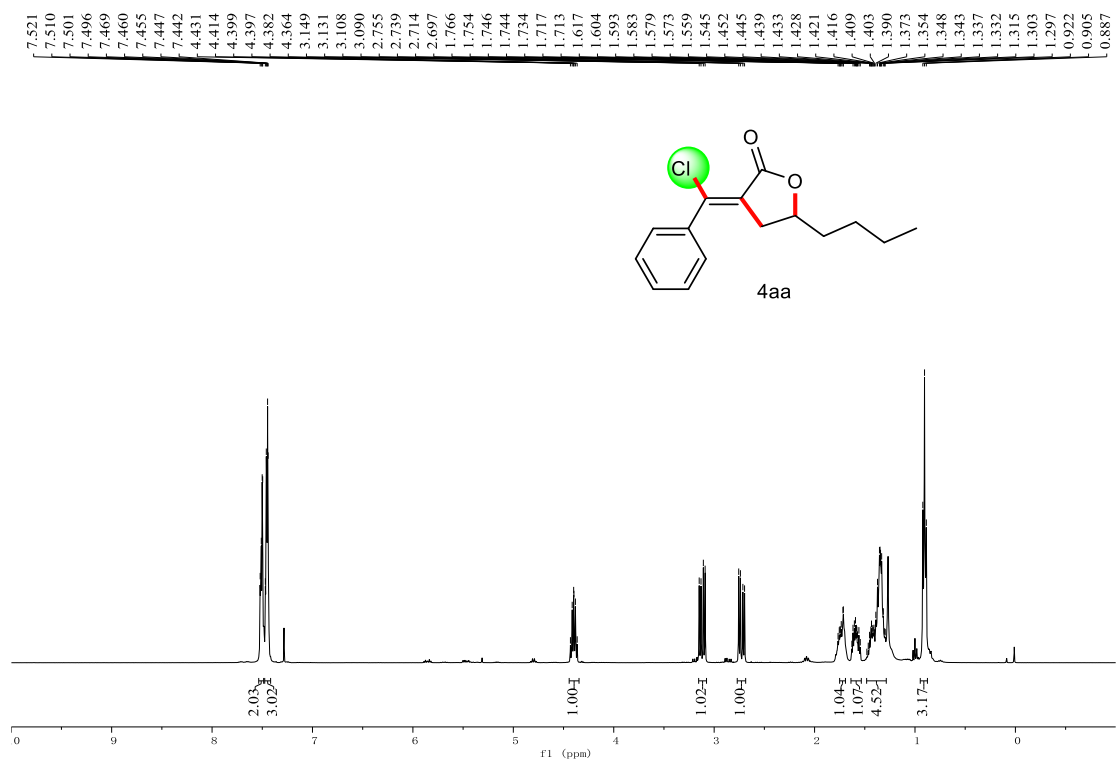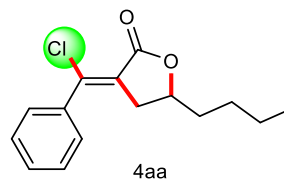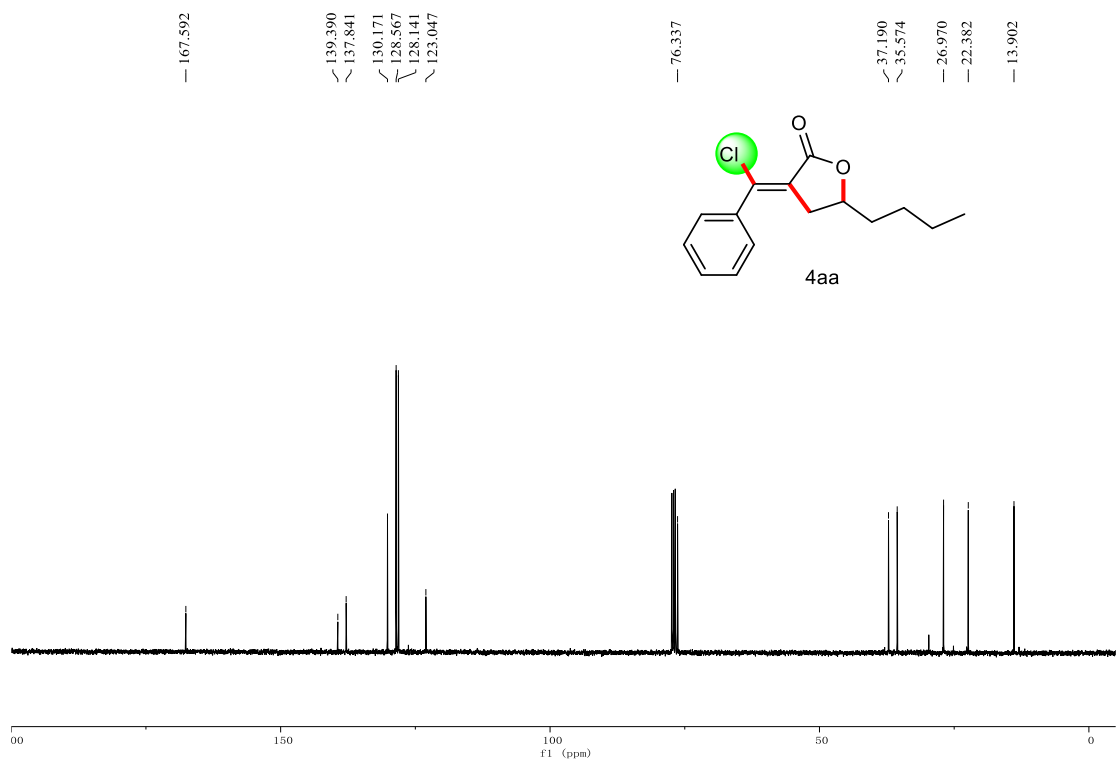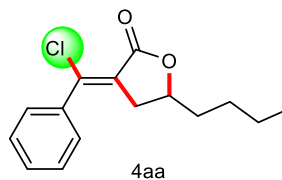

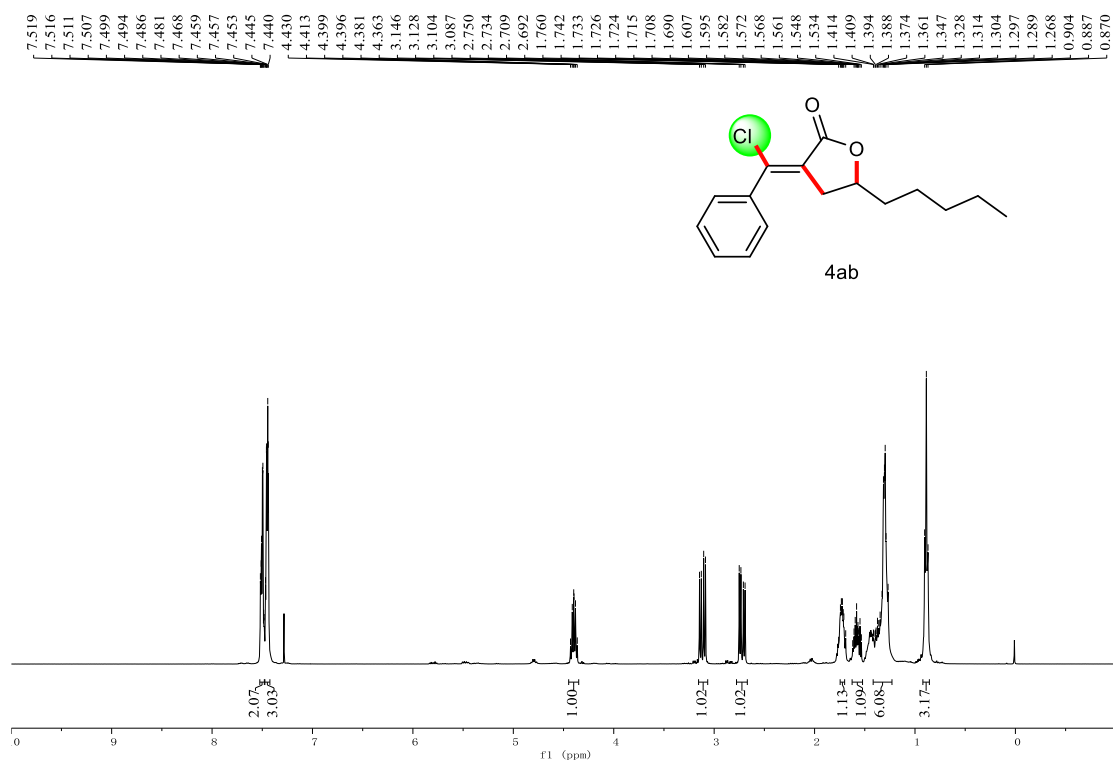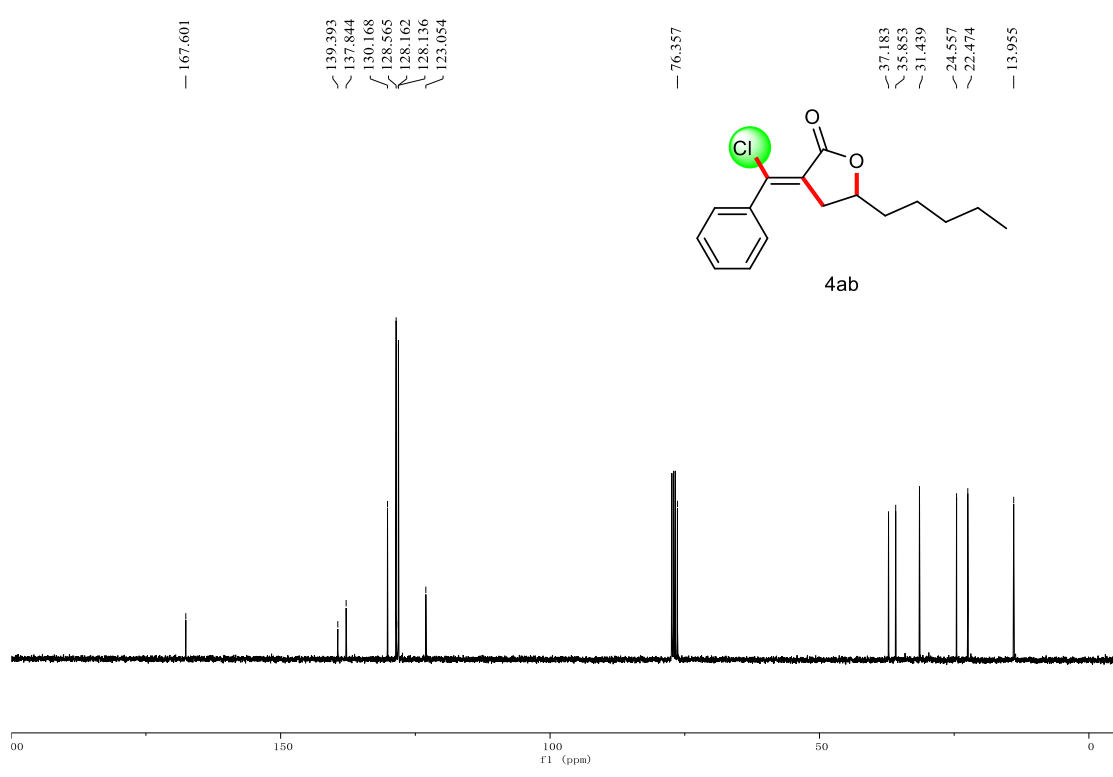

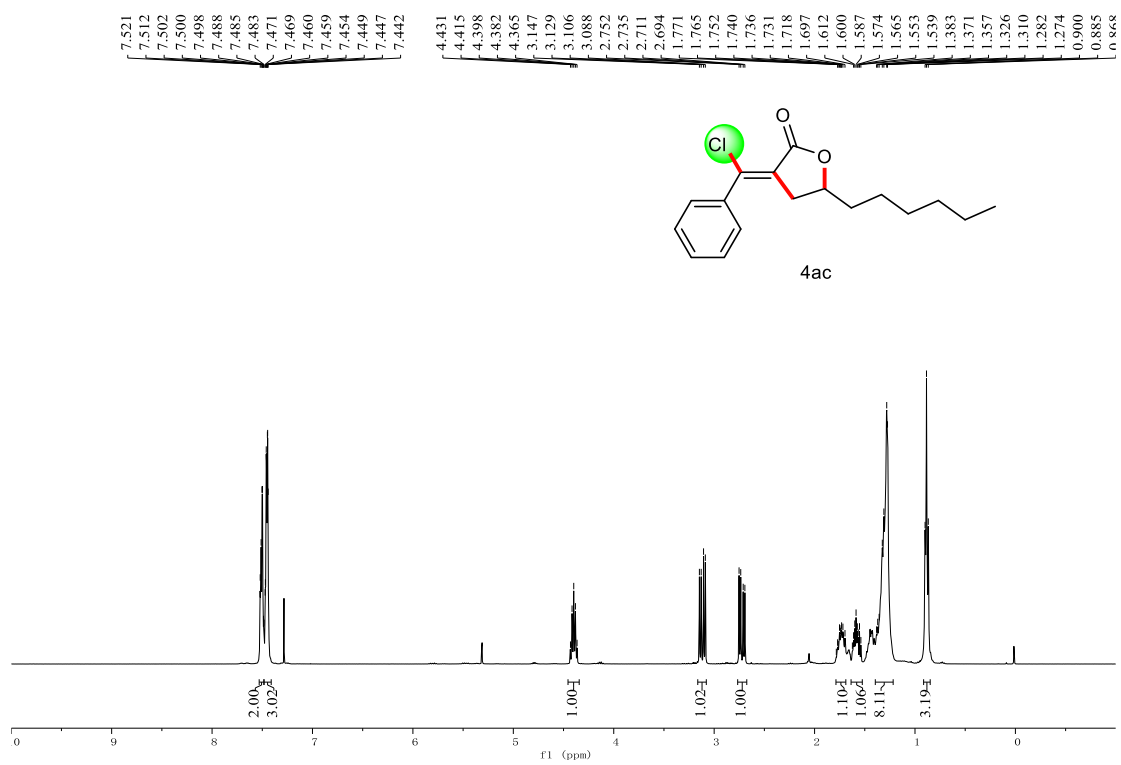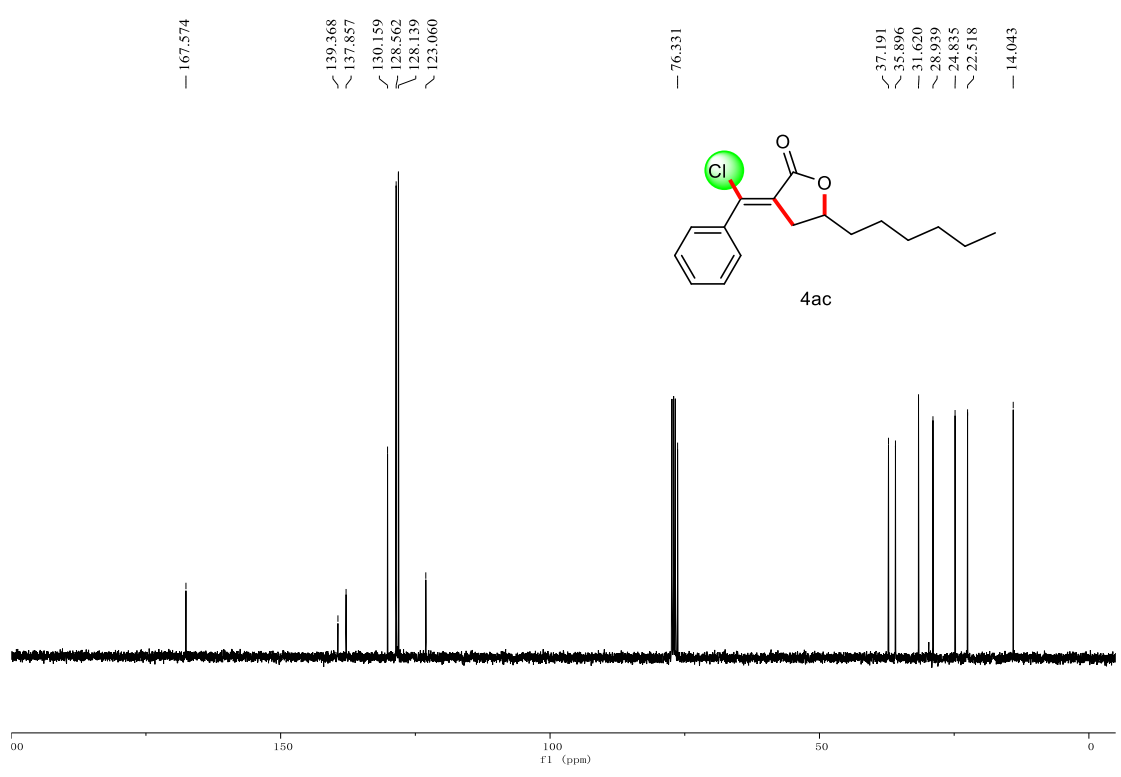

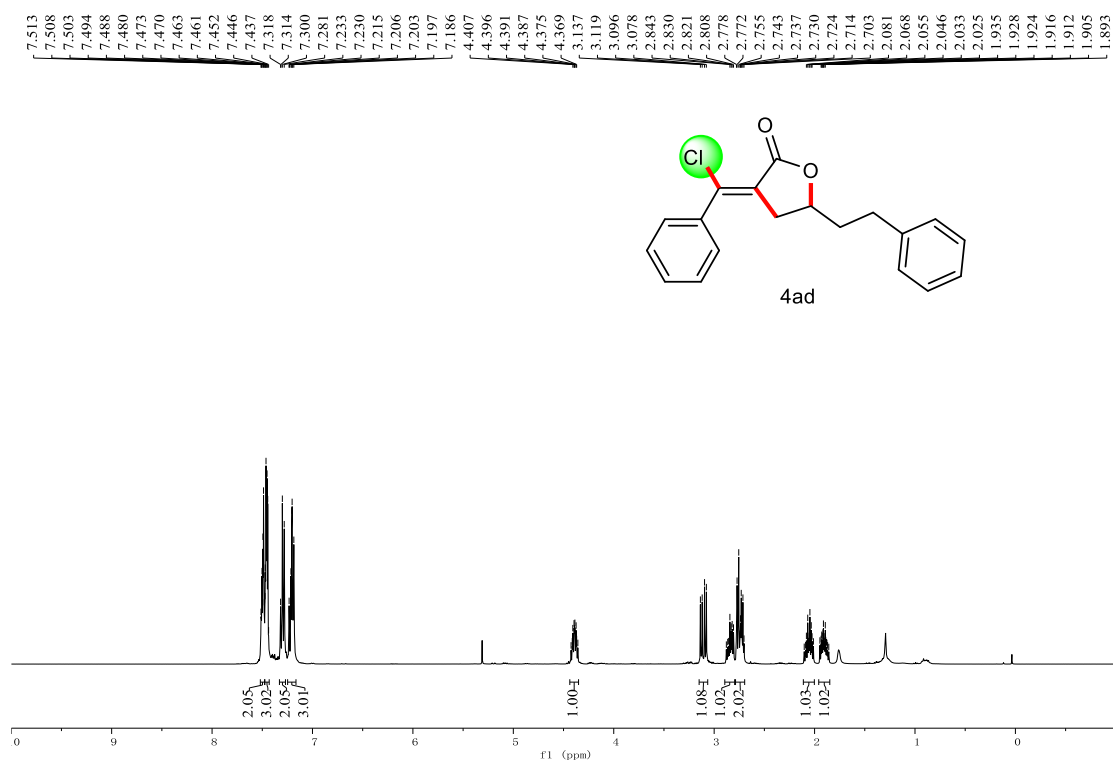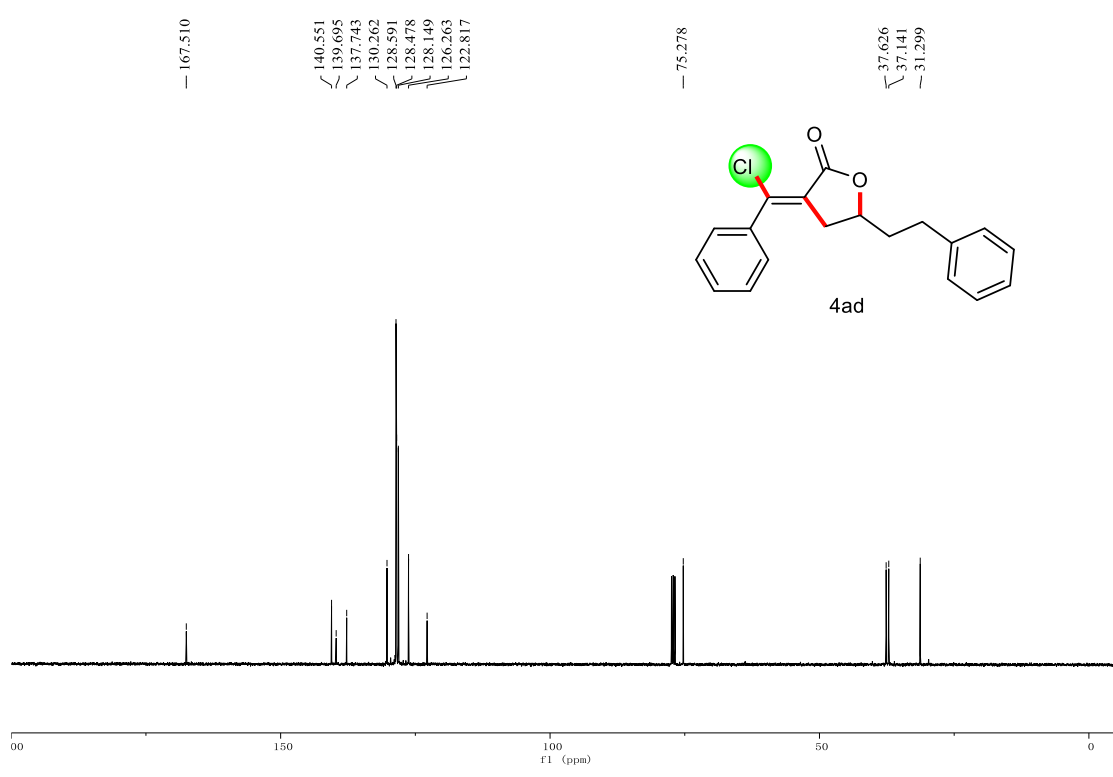

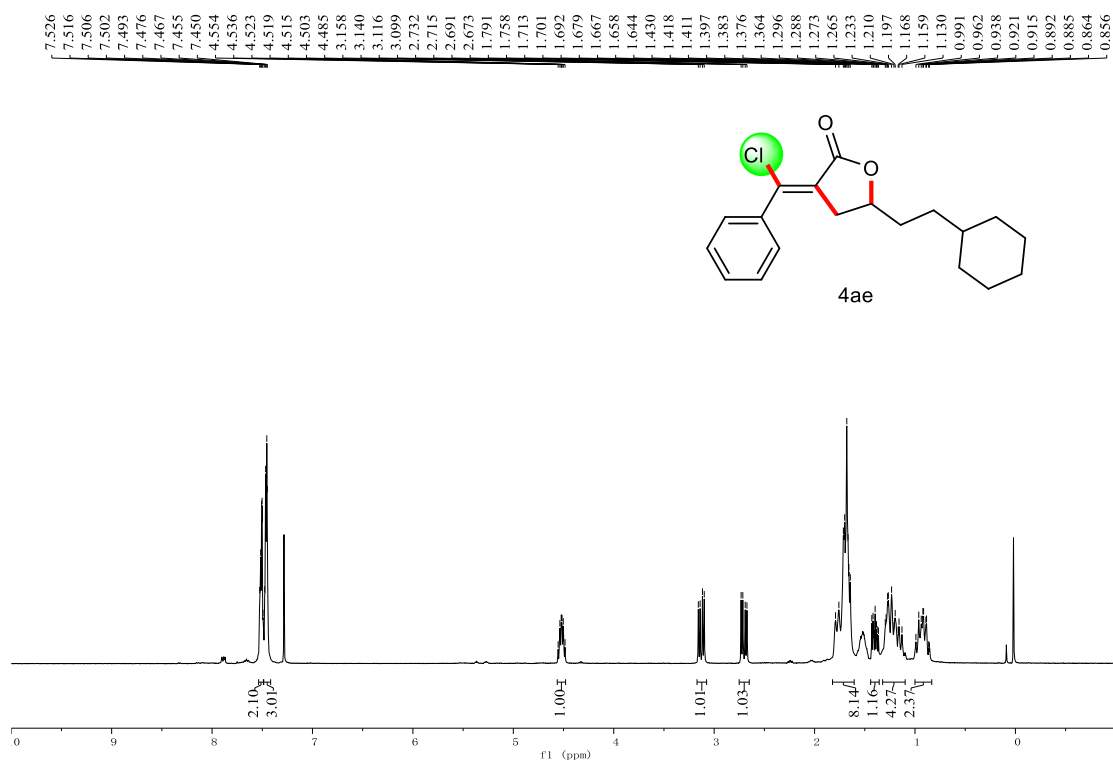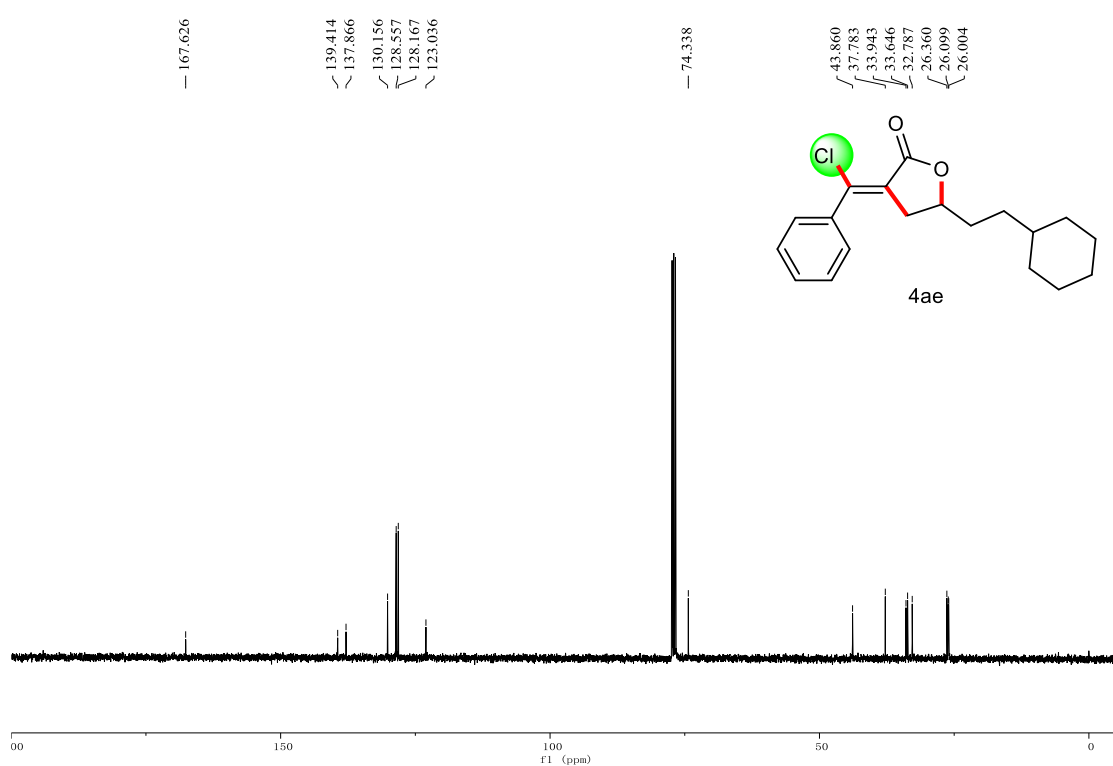

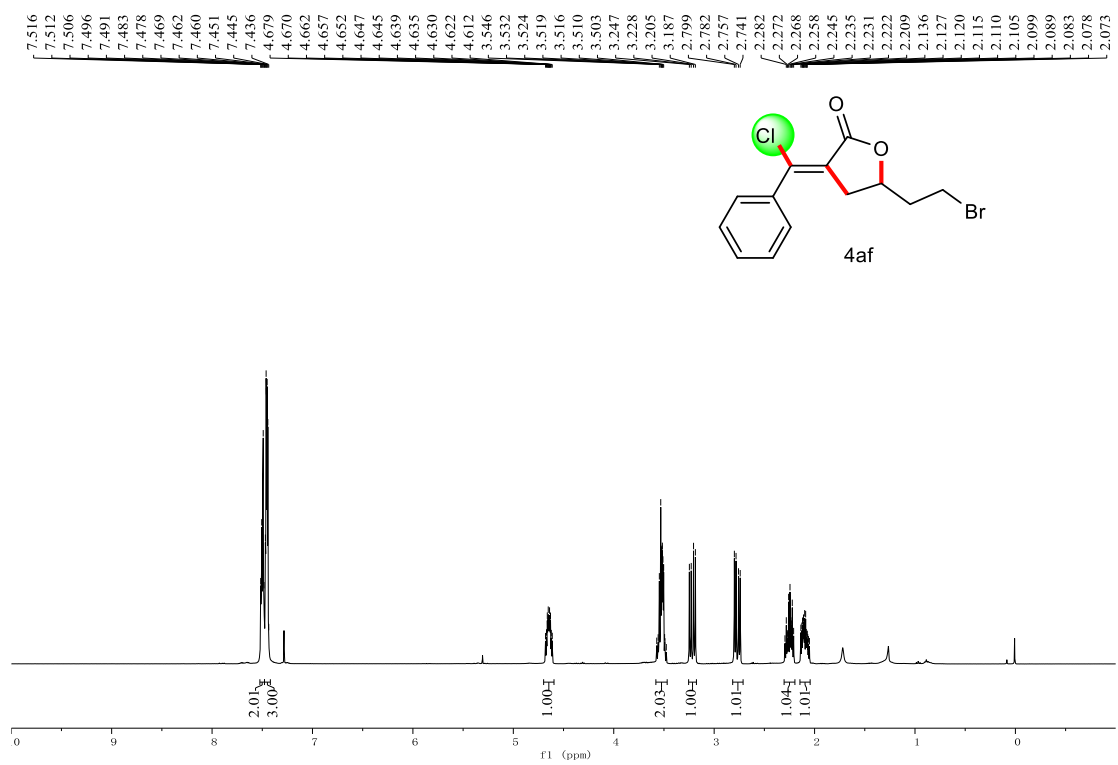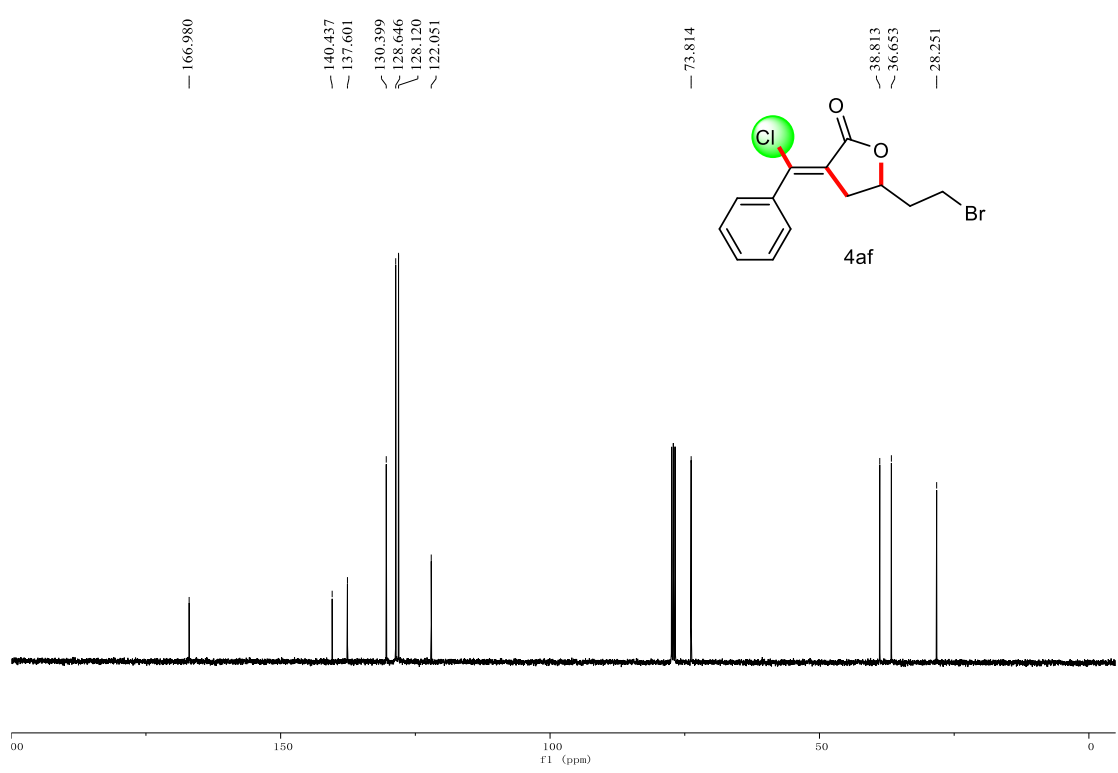

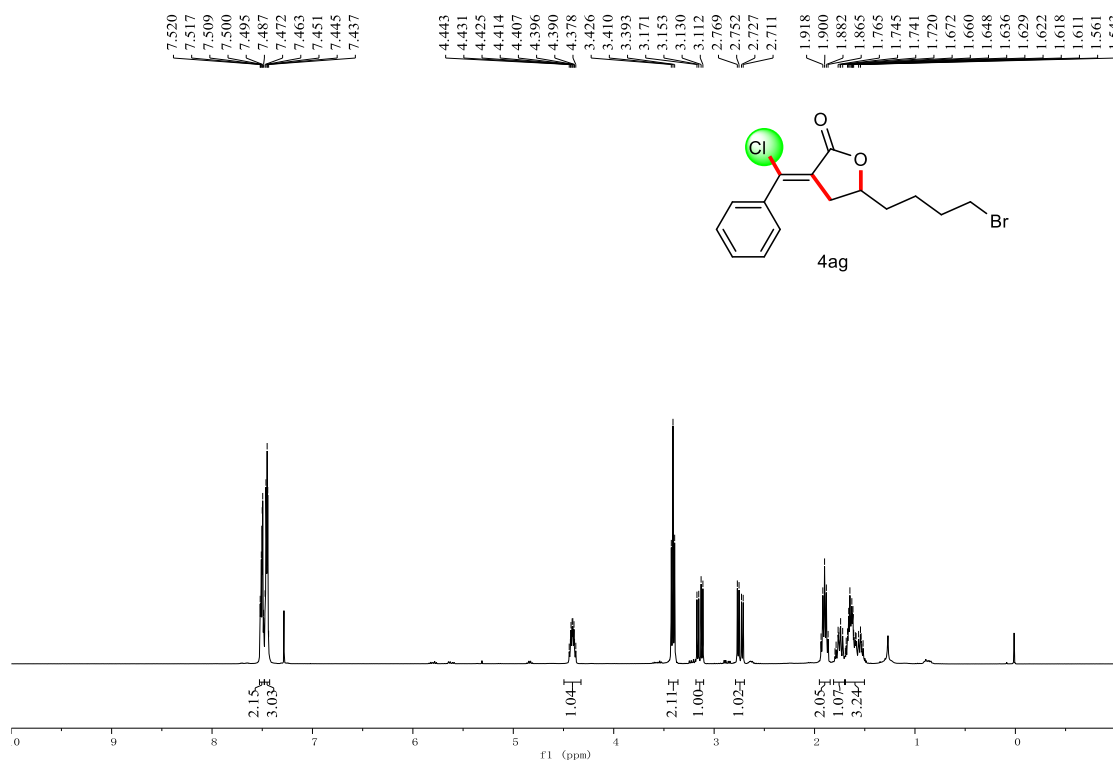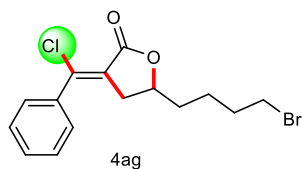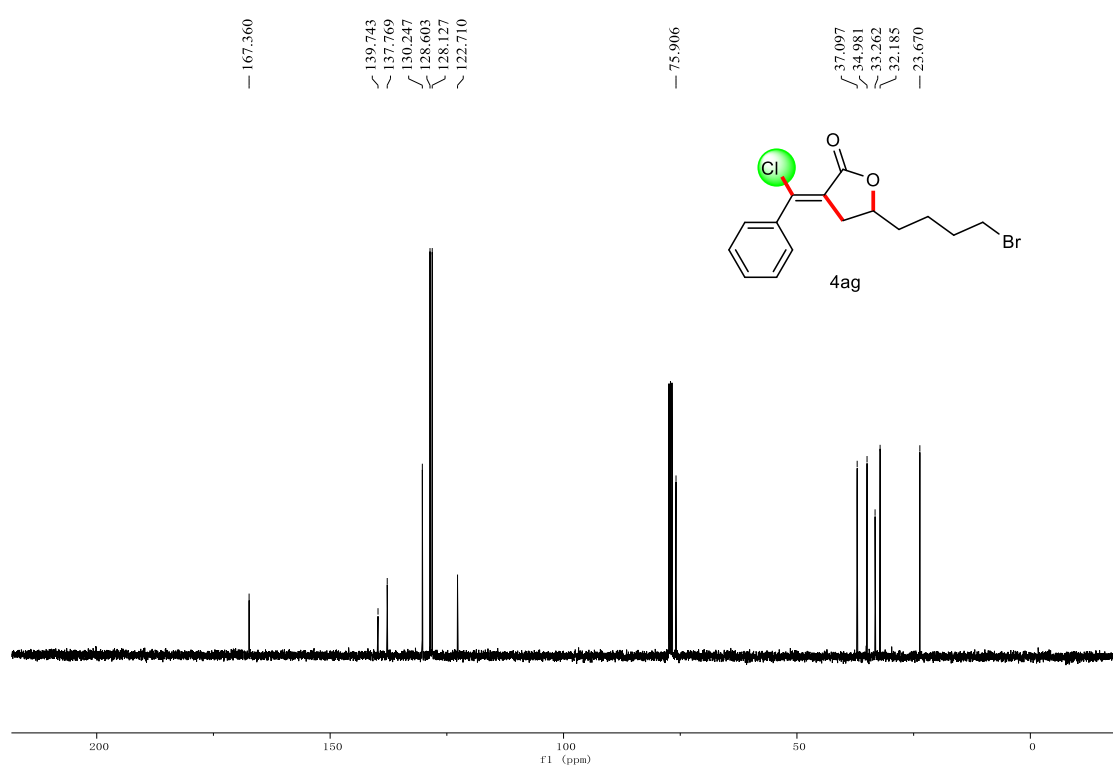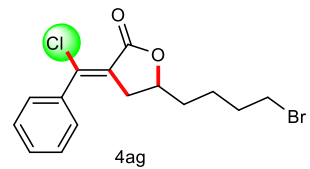

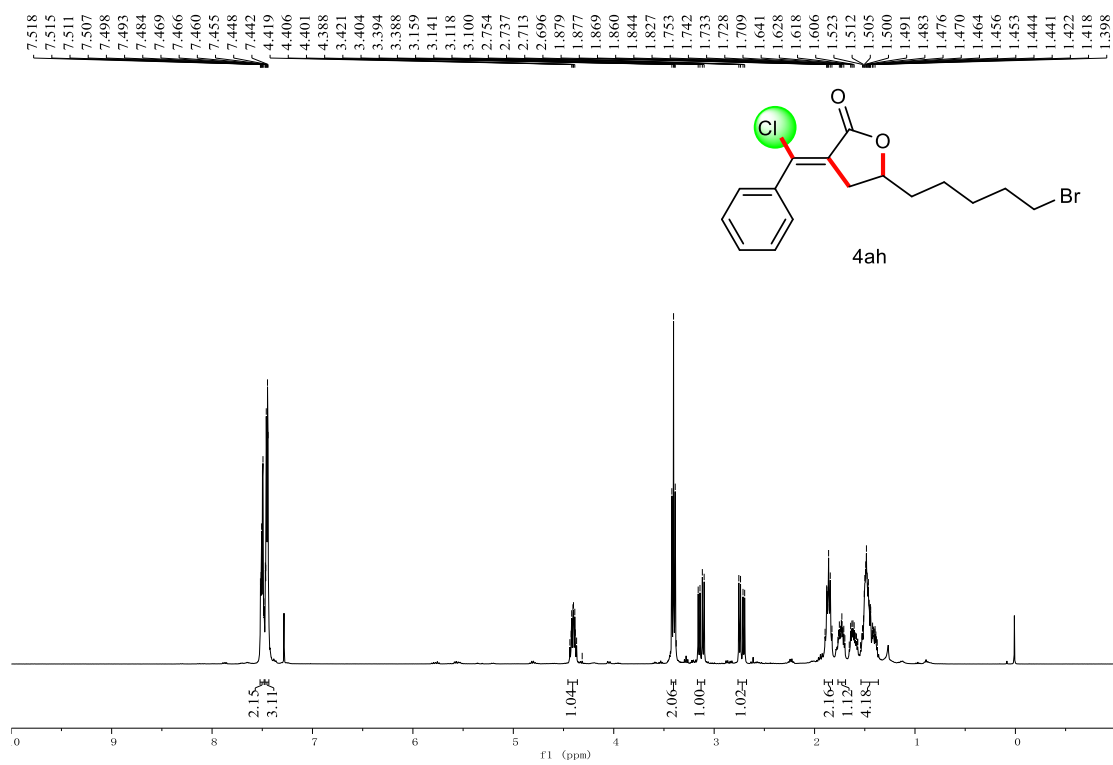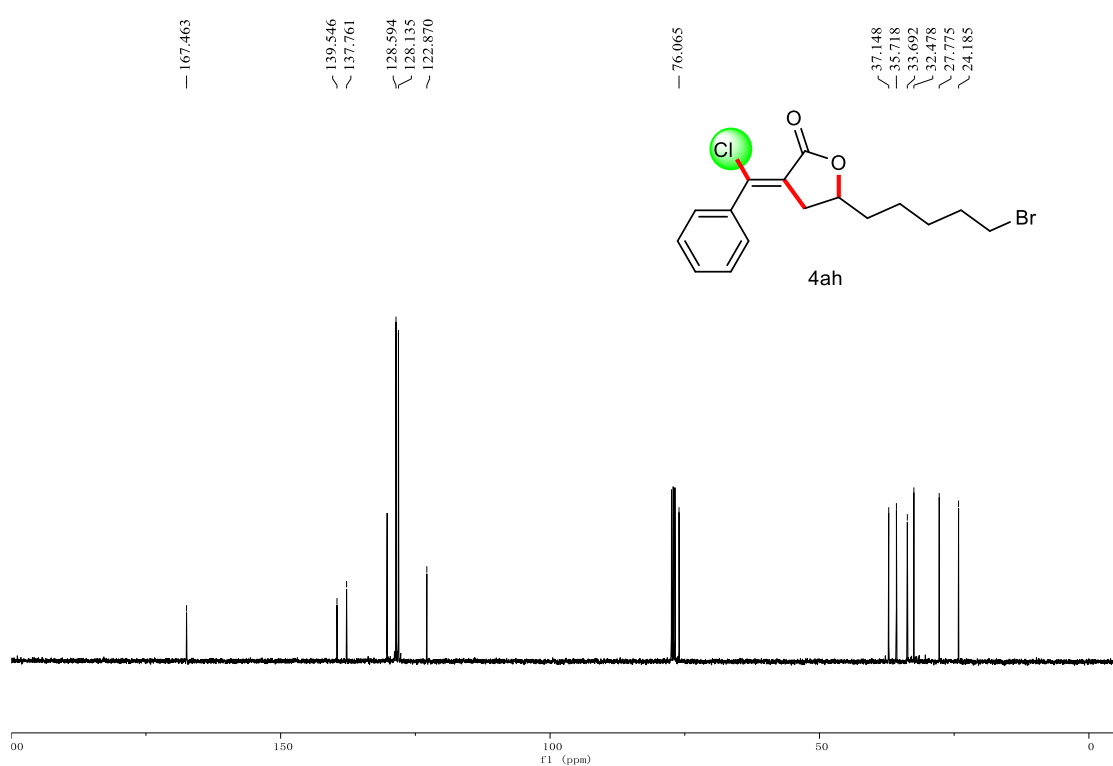



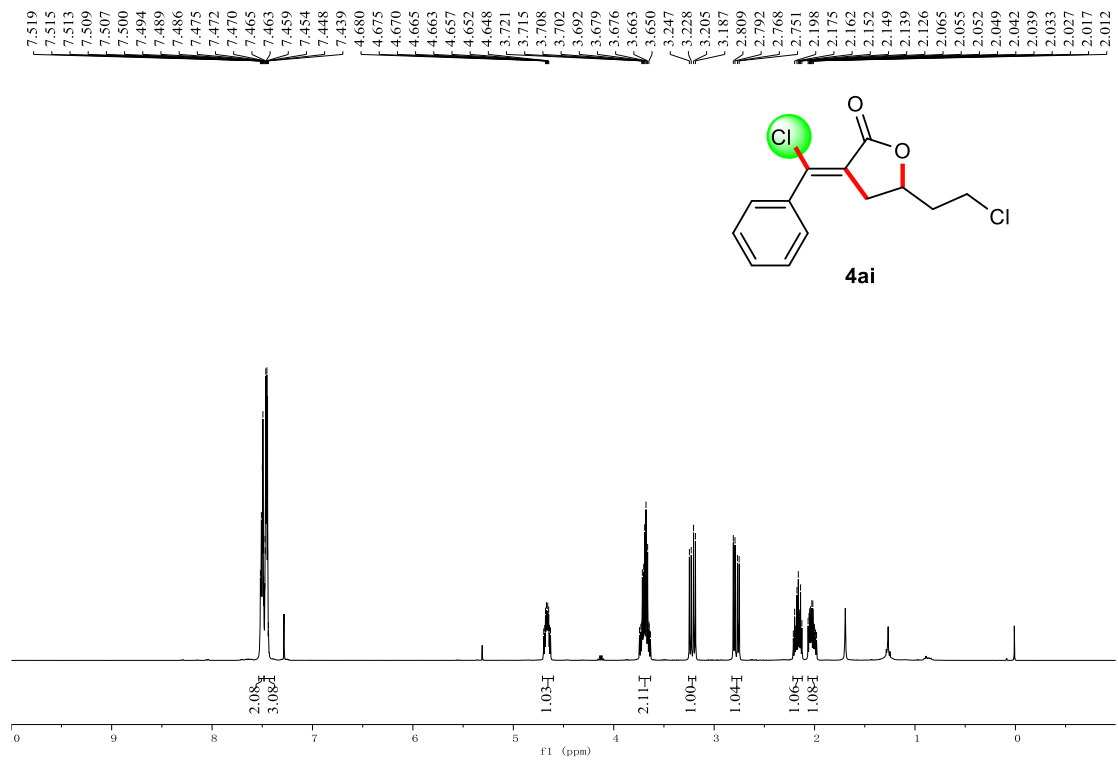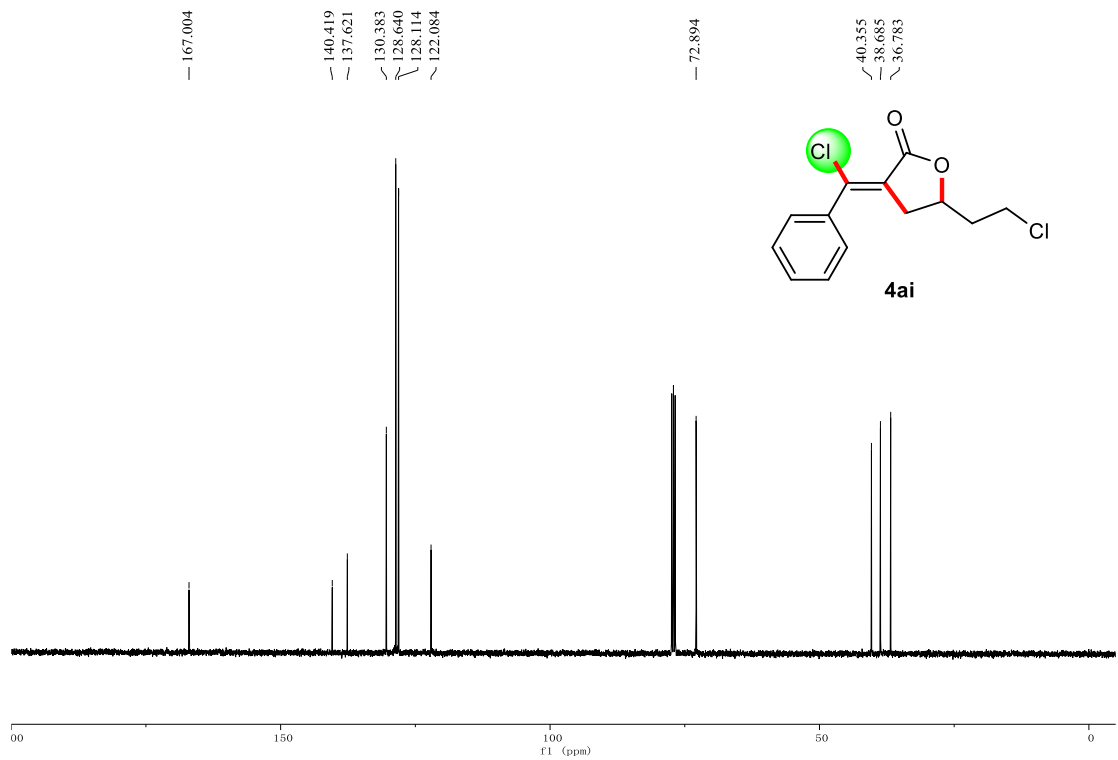

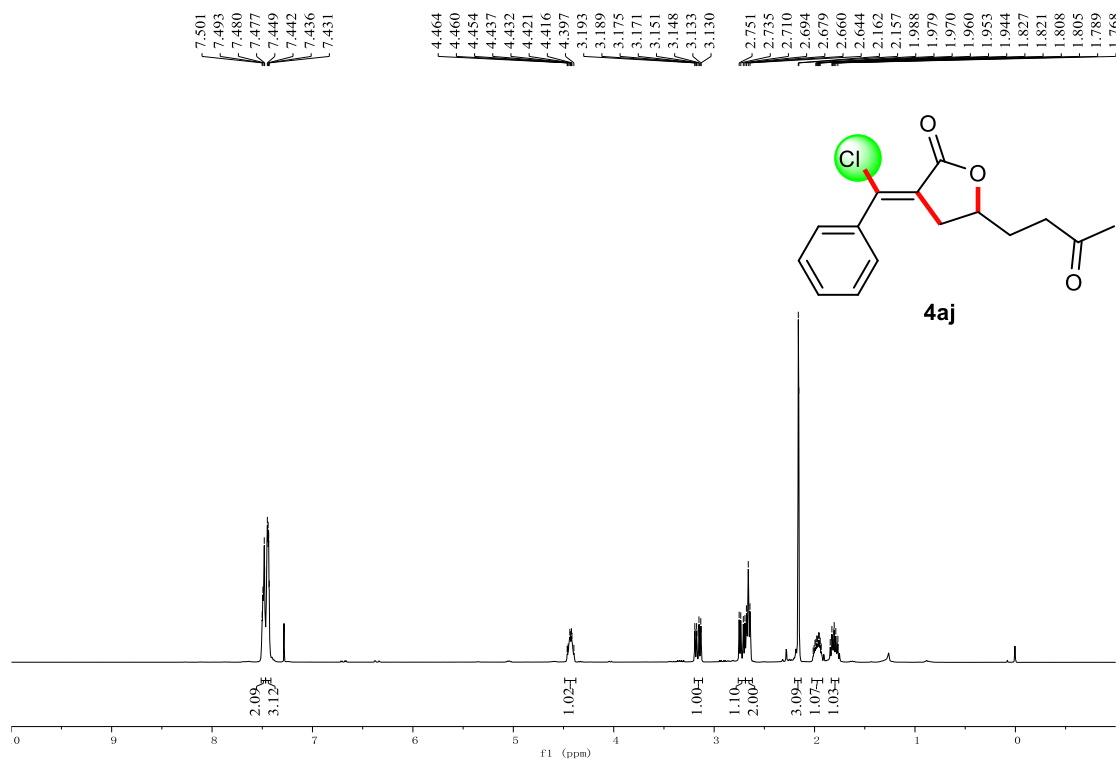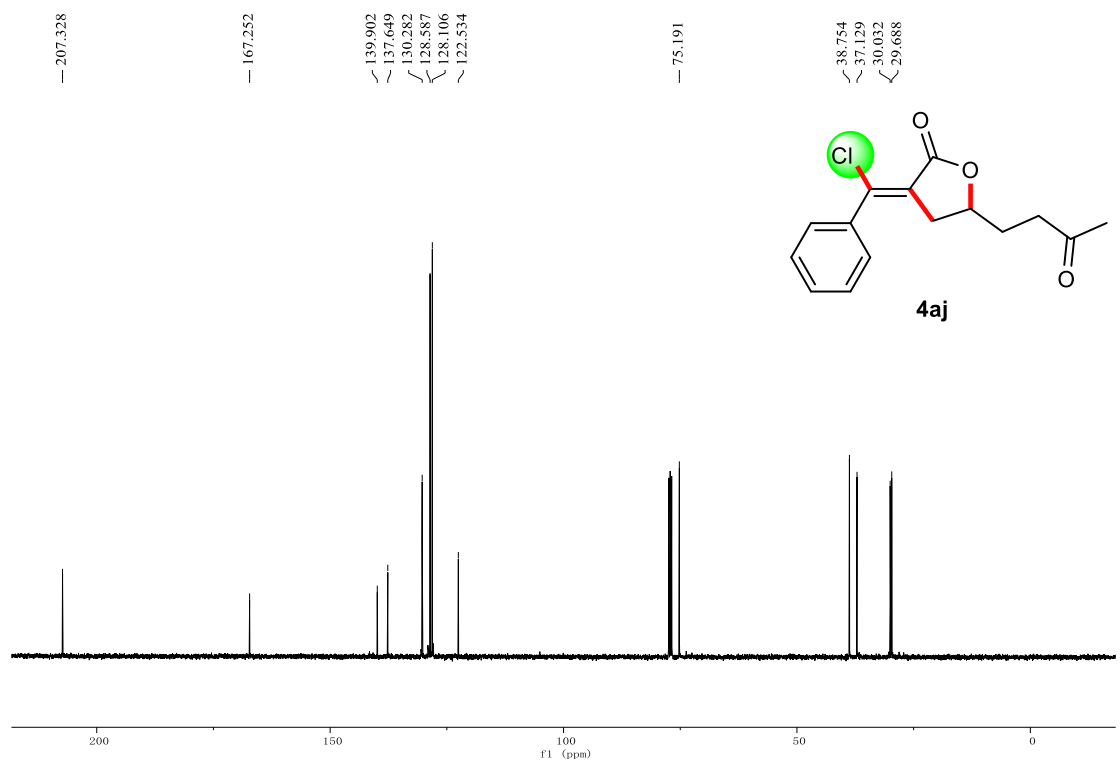

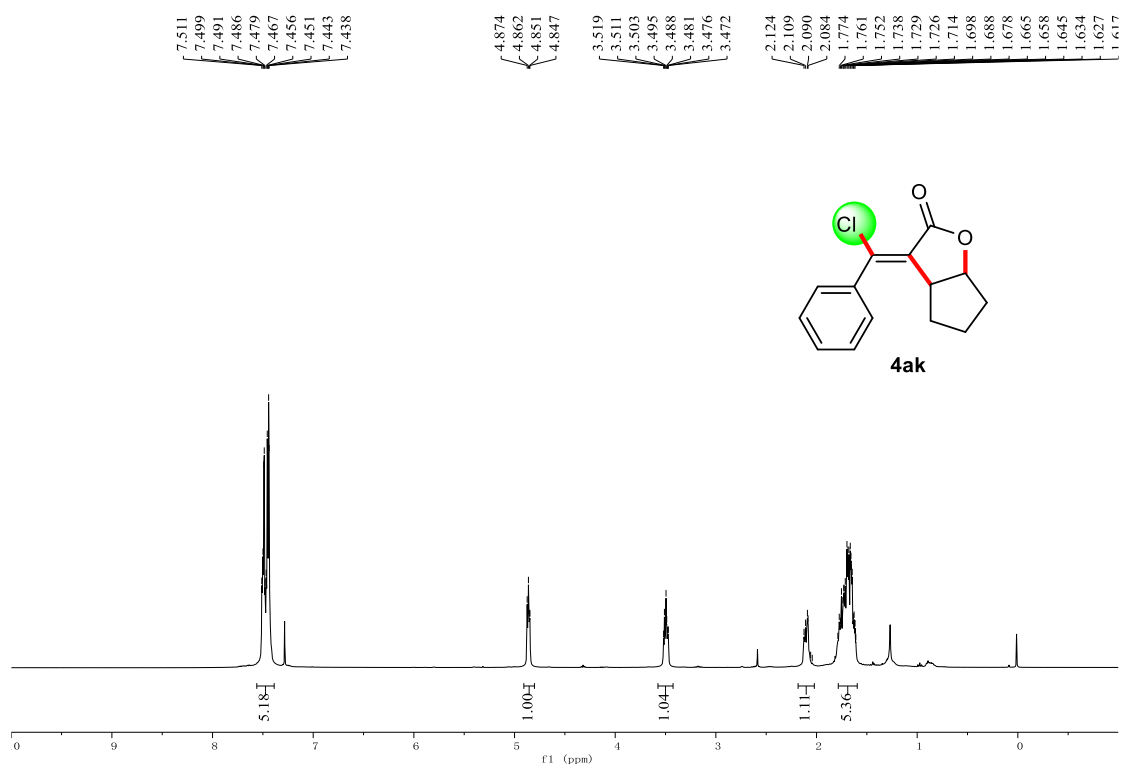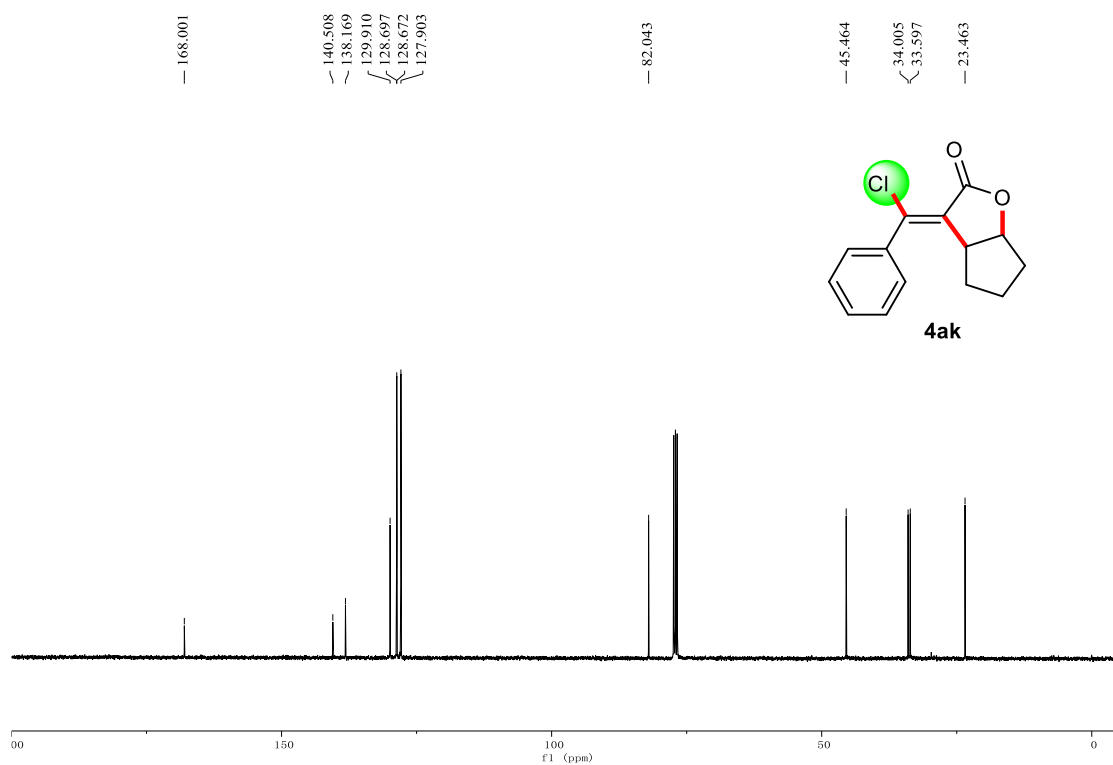

# <sup>1</sup>H and <sup>13</sup>C NMR spectra of compounds 5

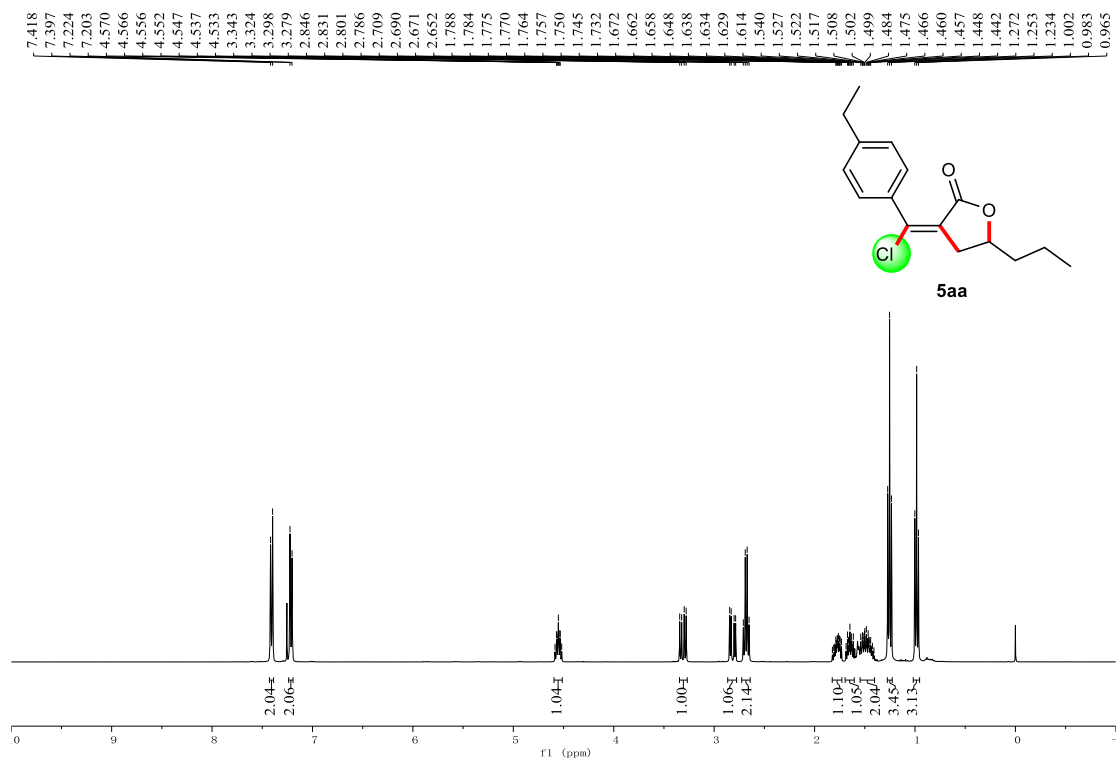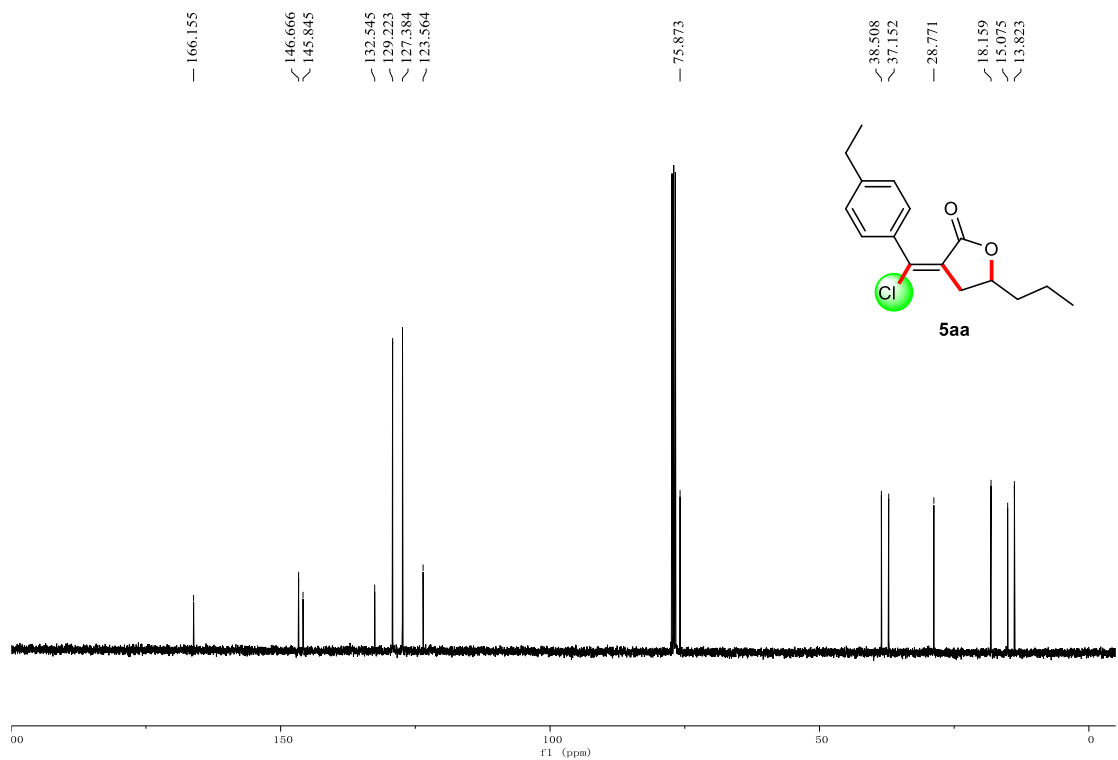

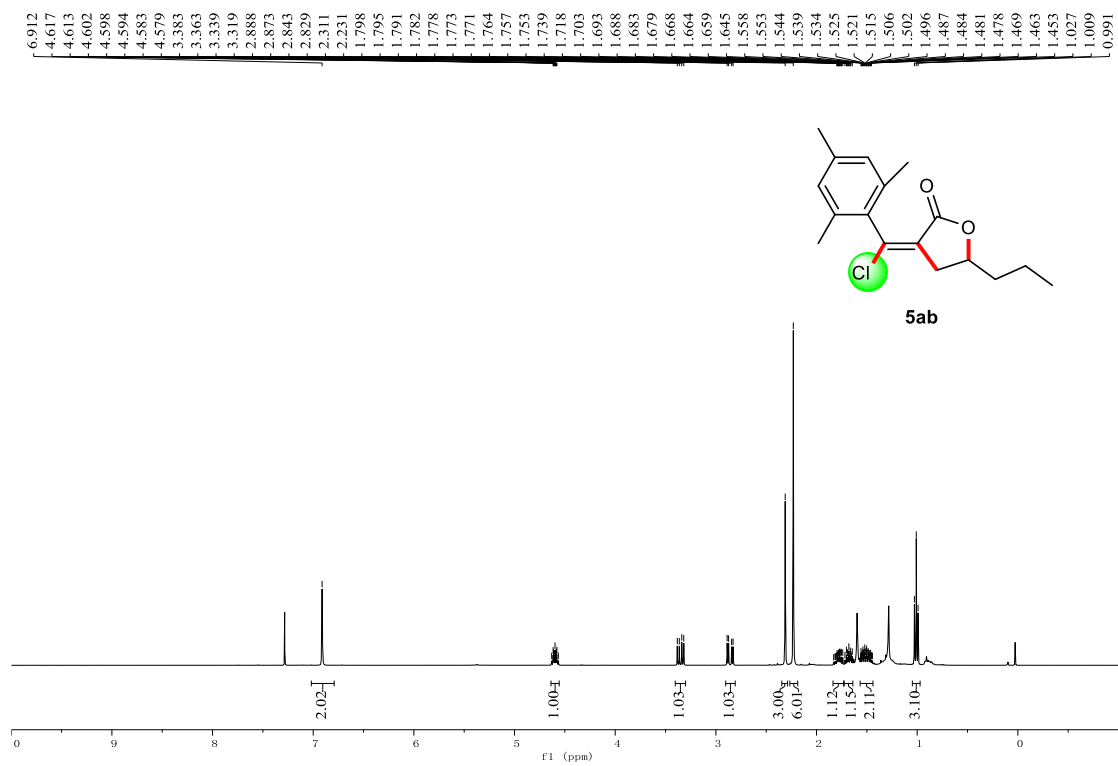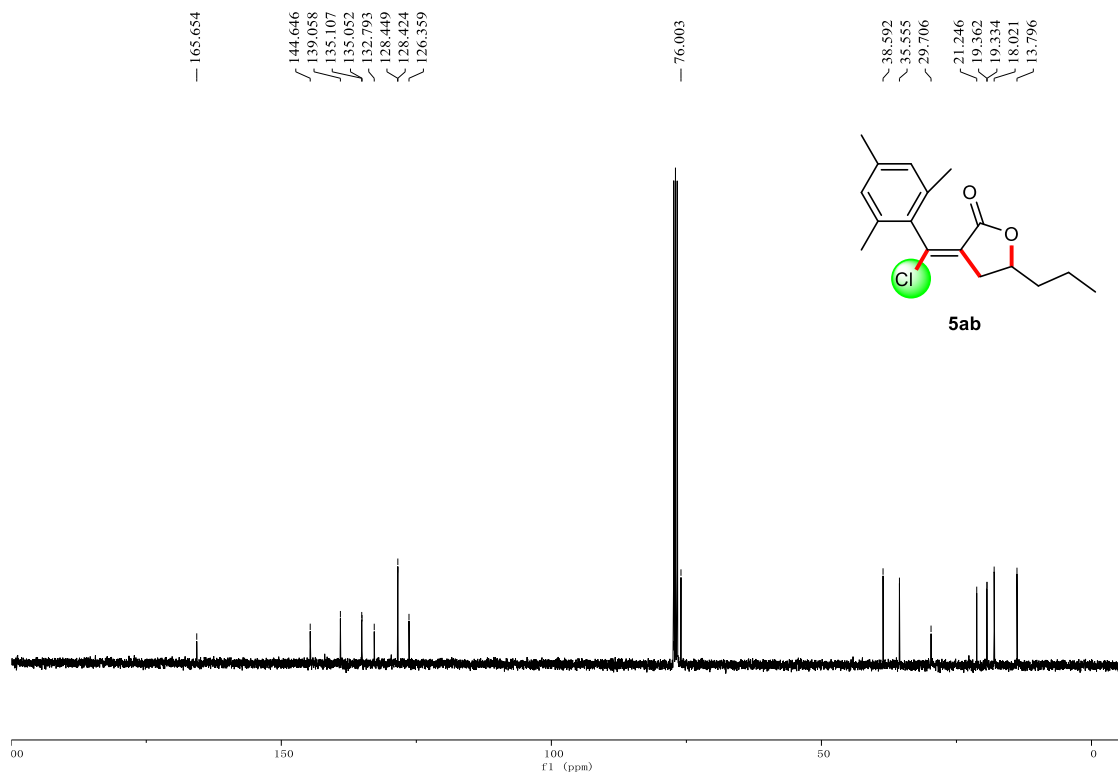

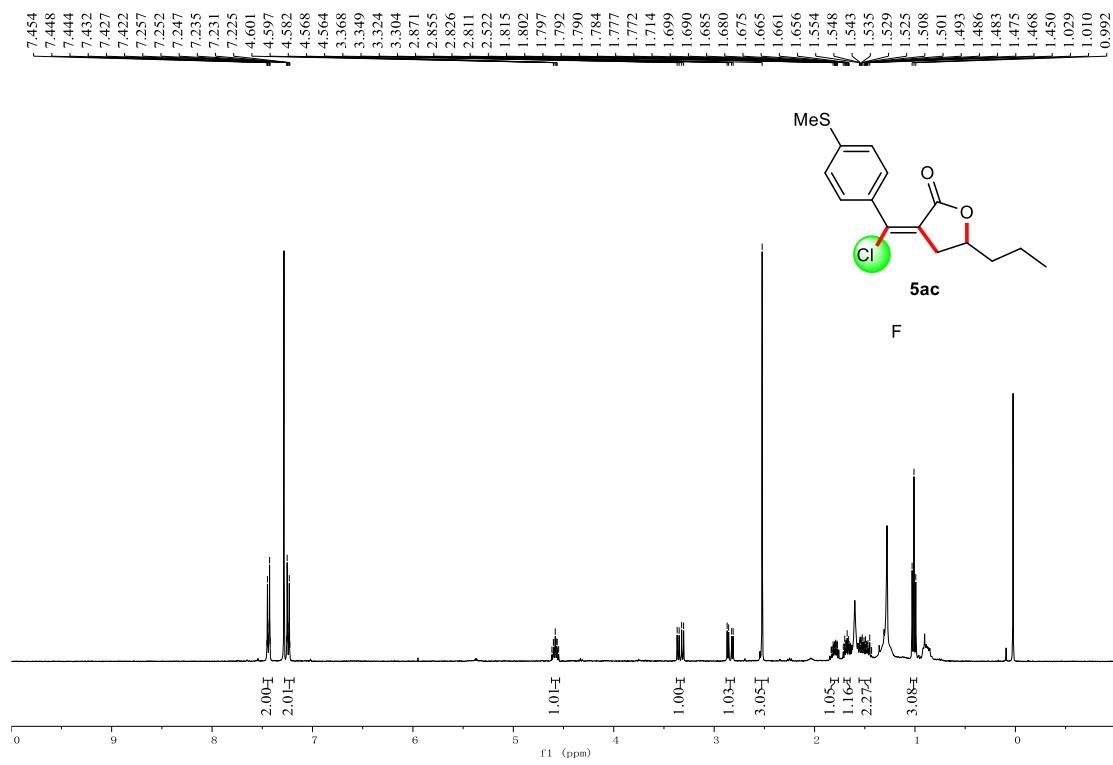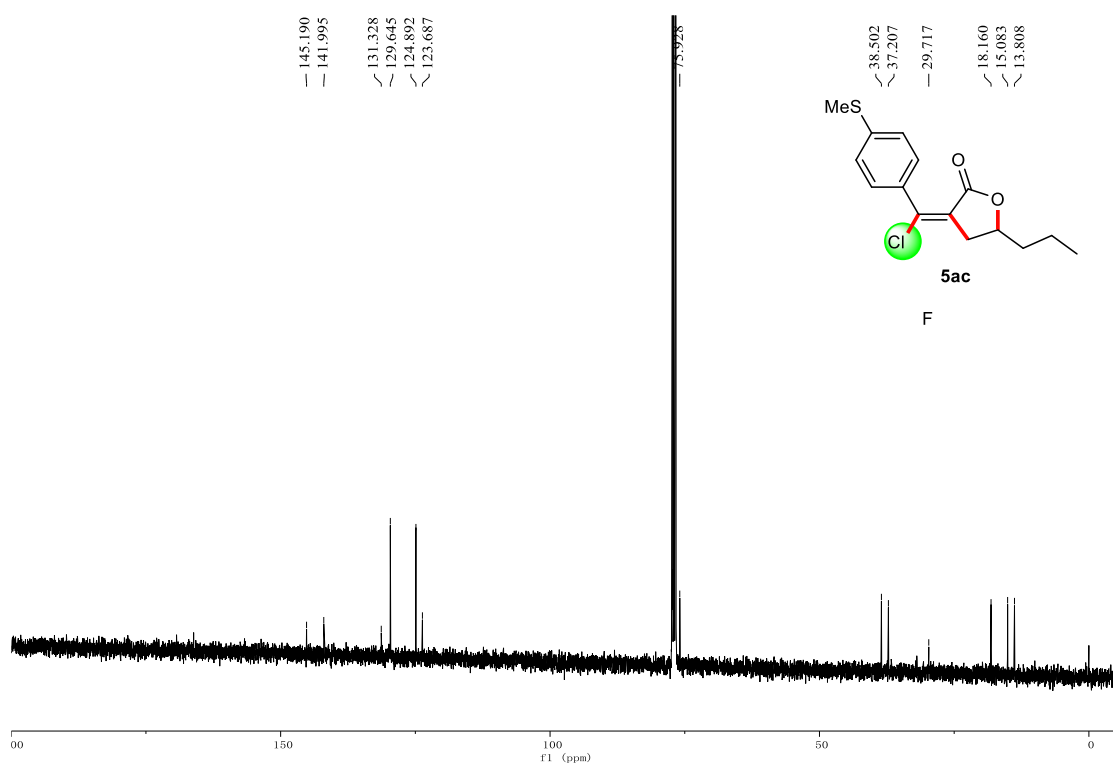

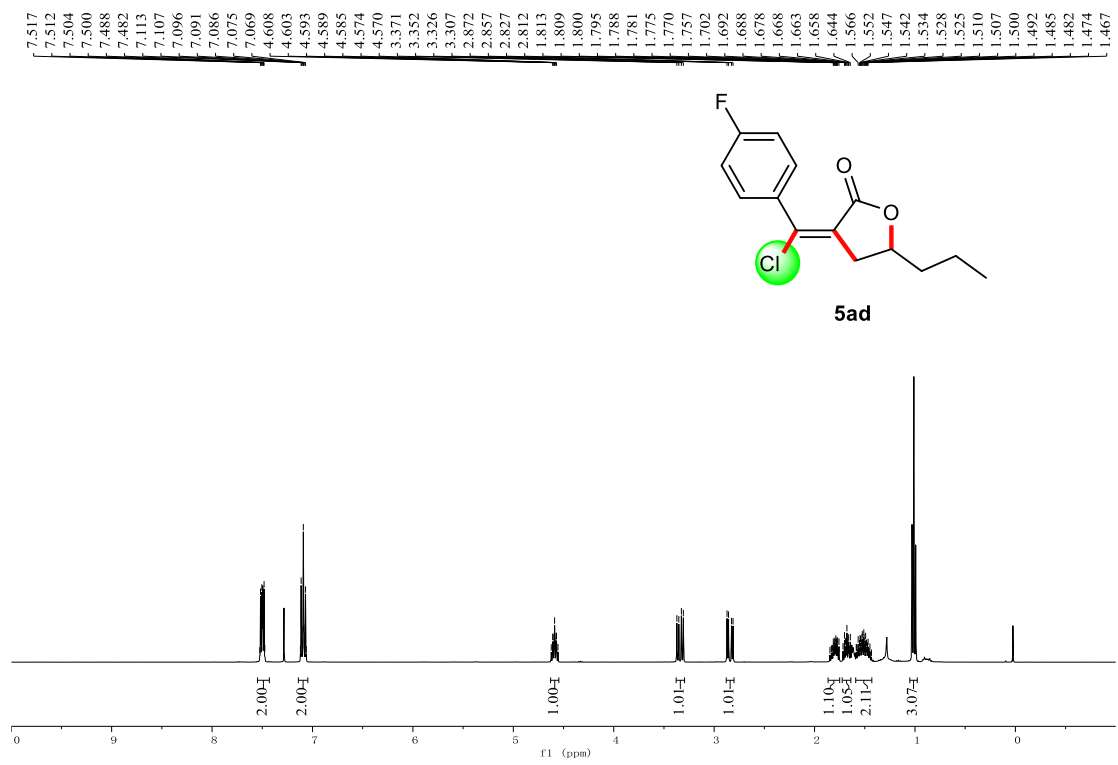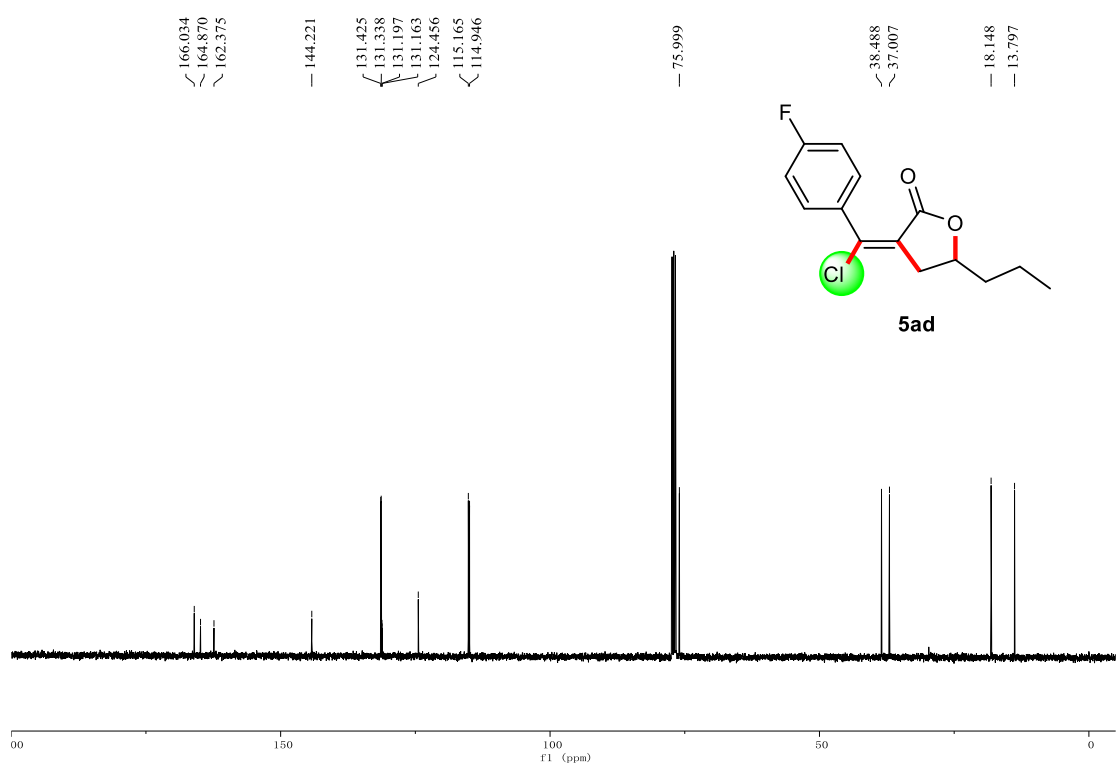

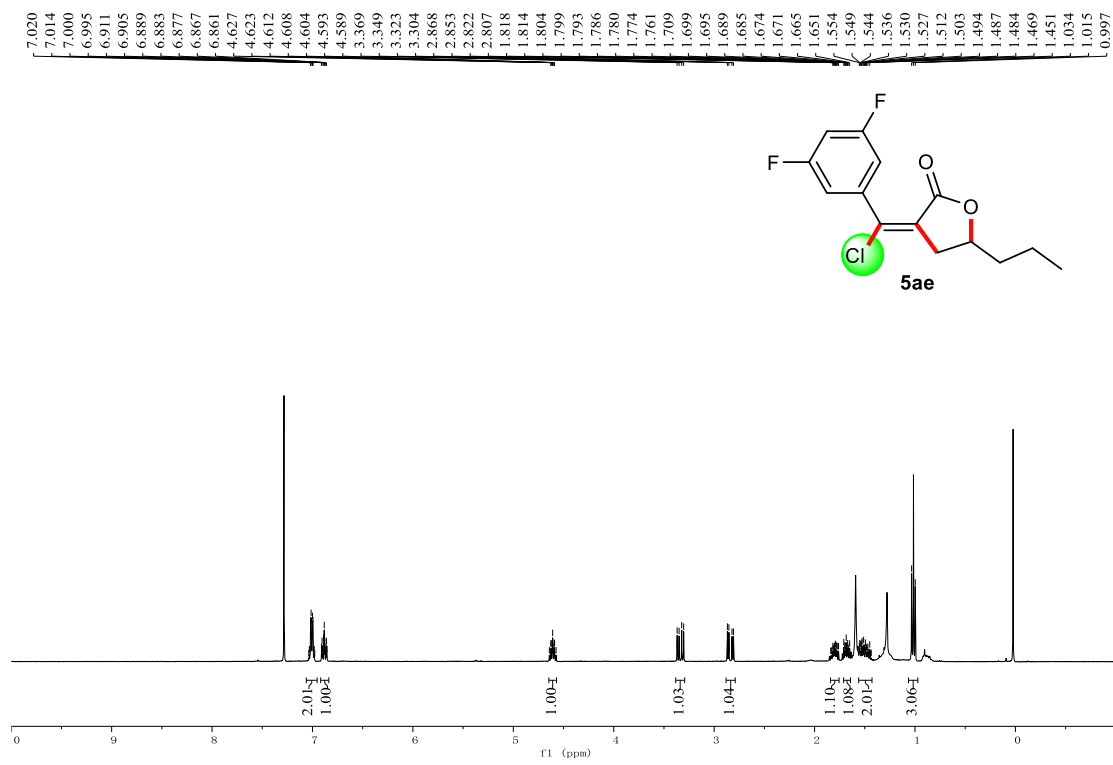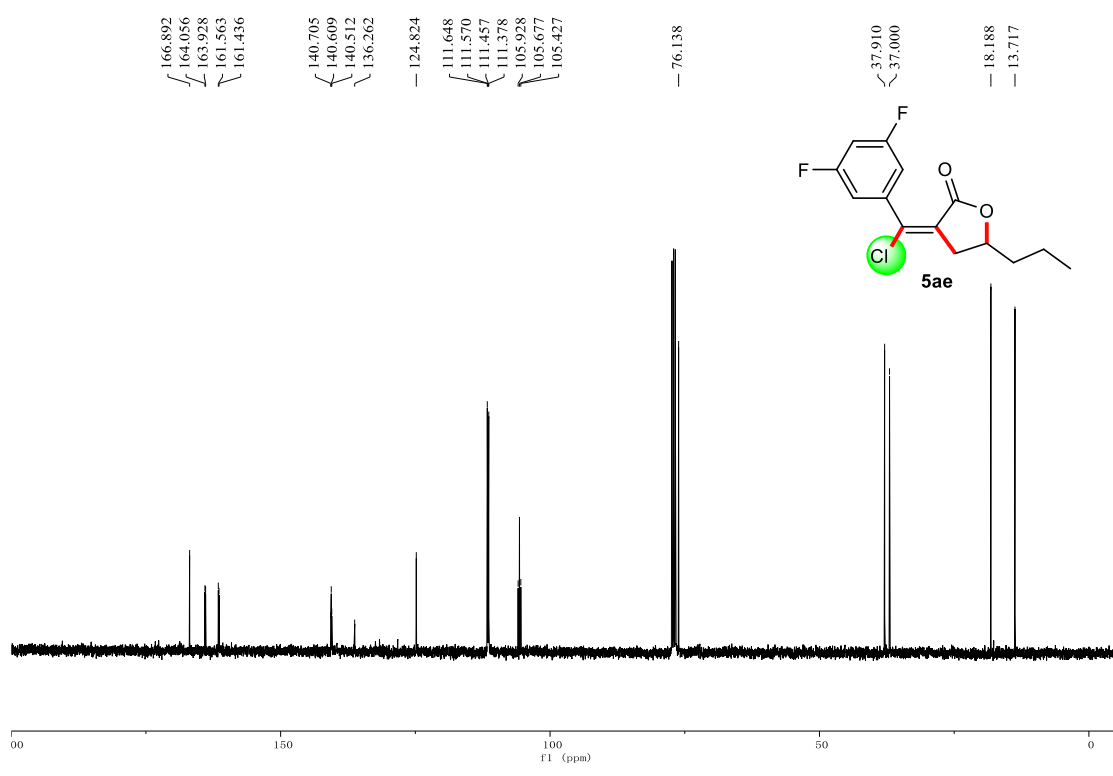



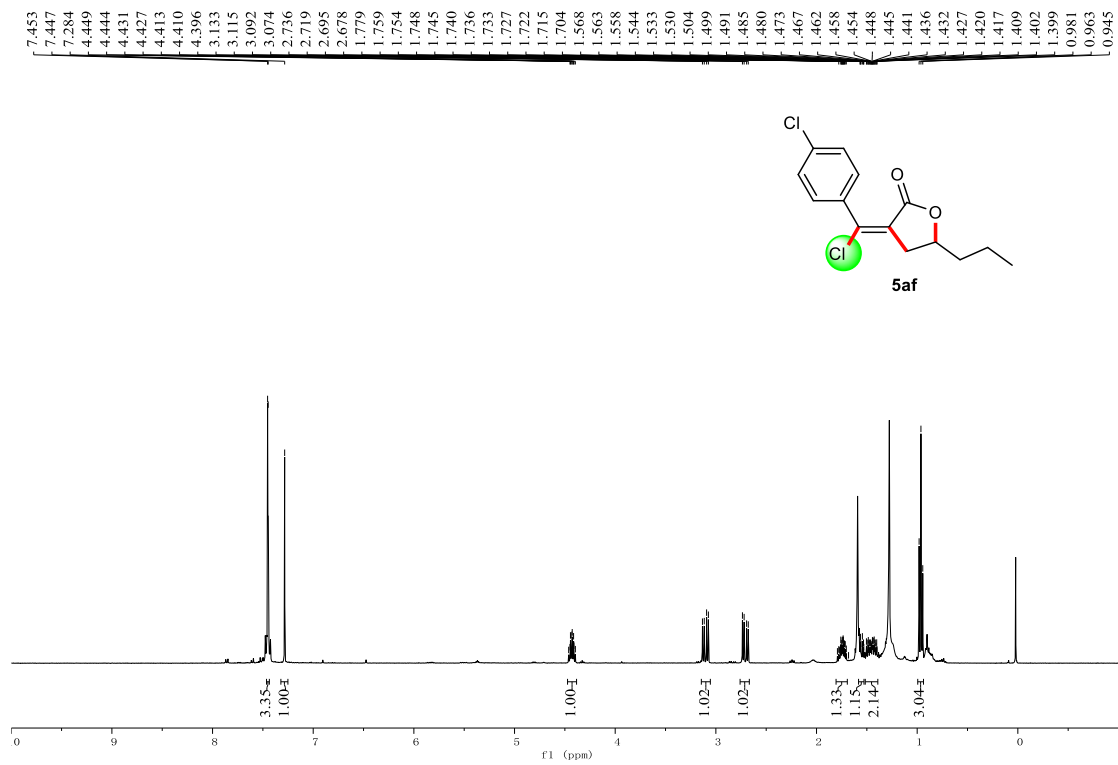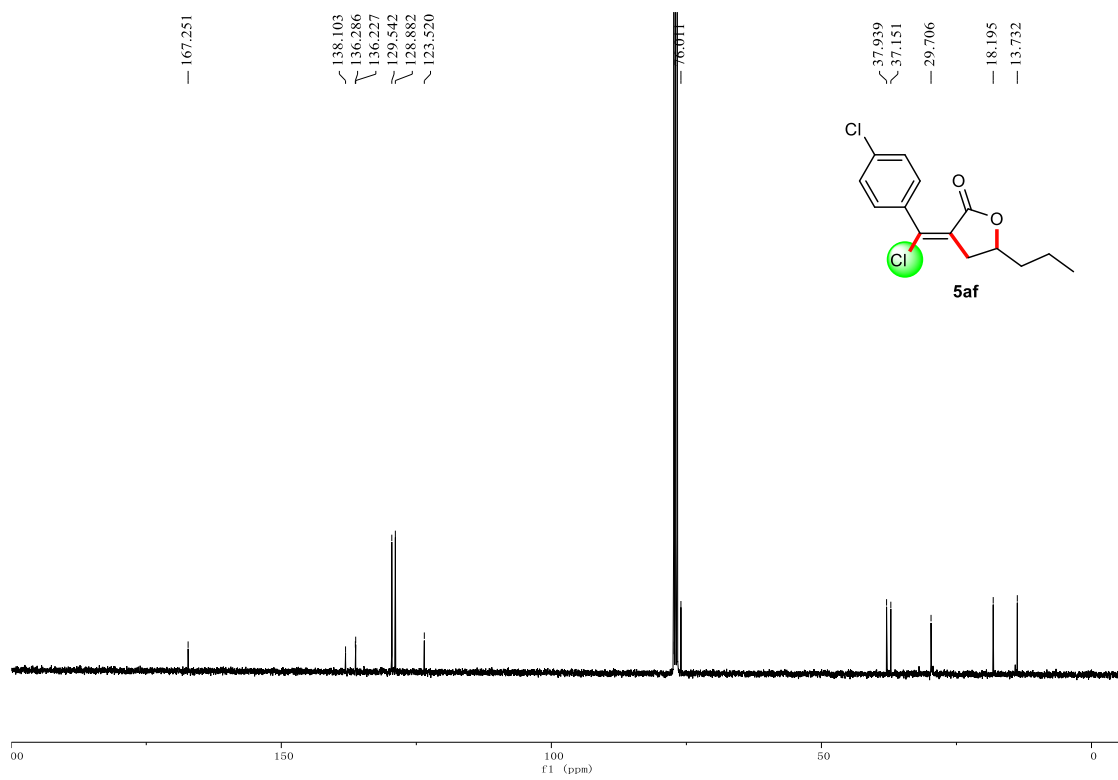

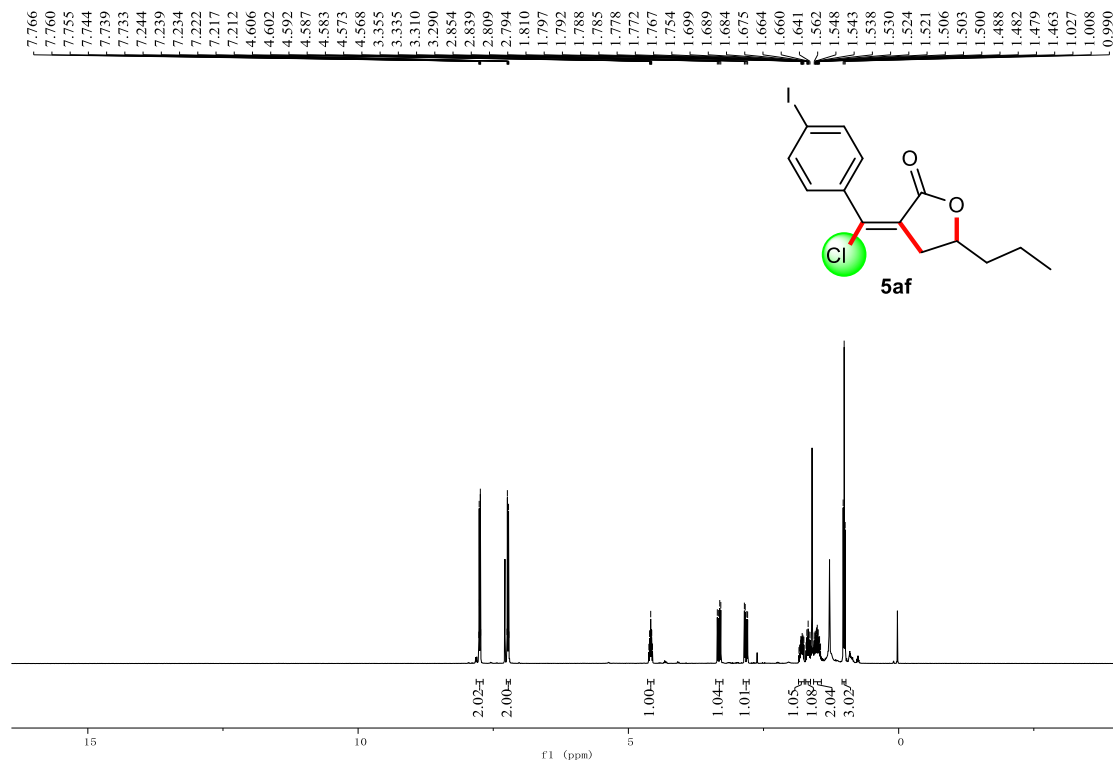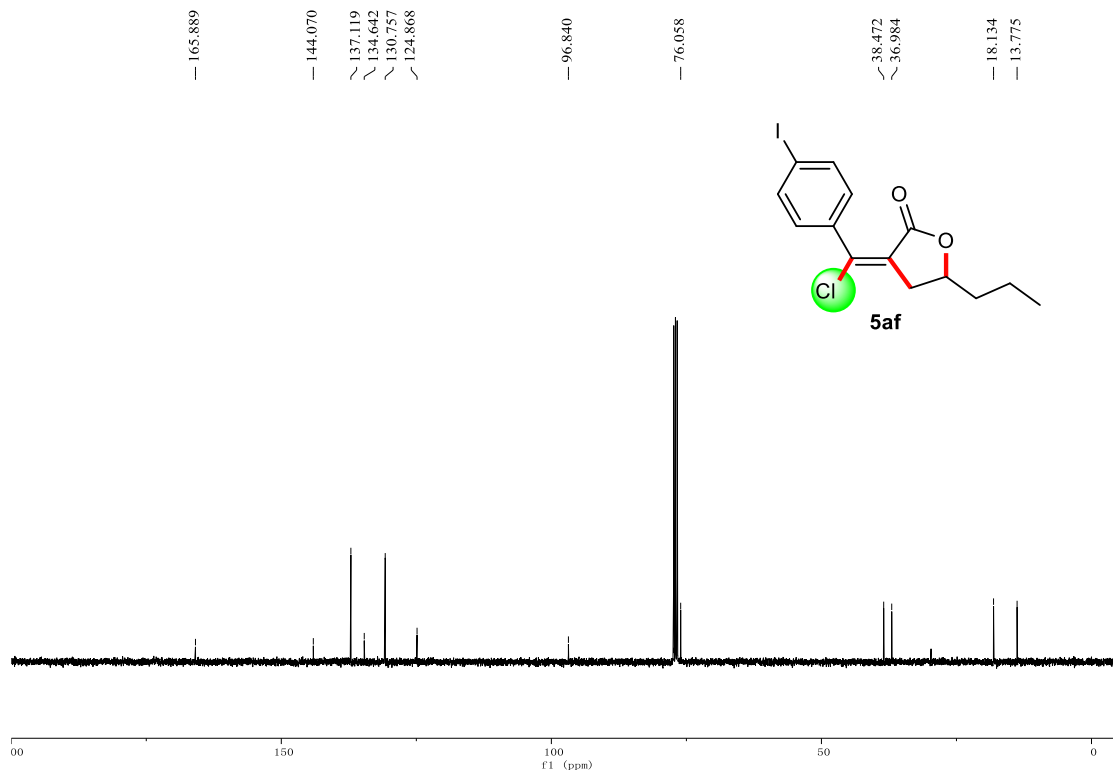

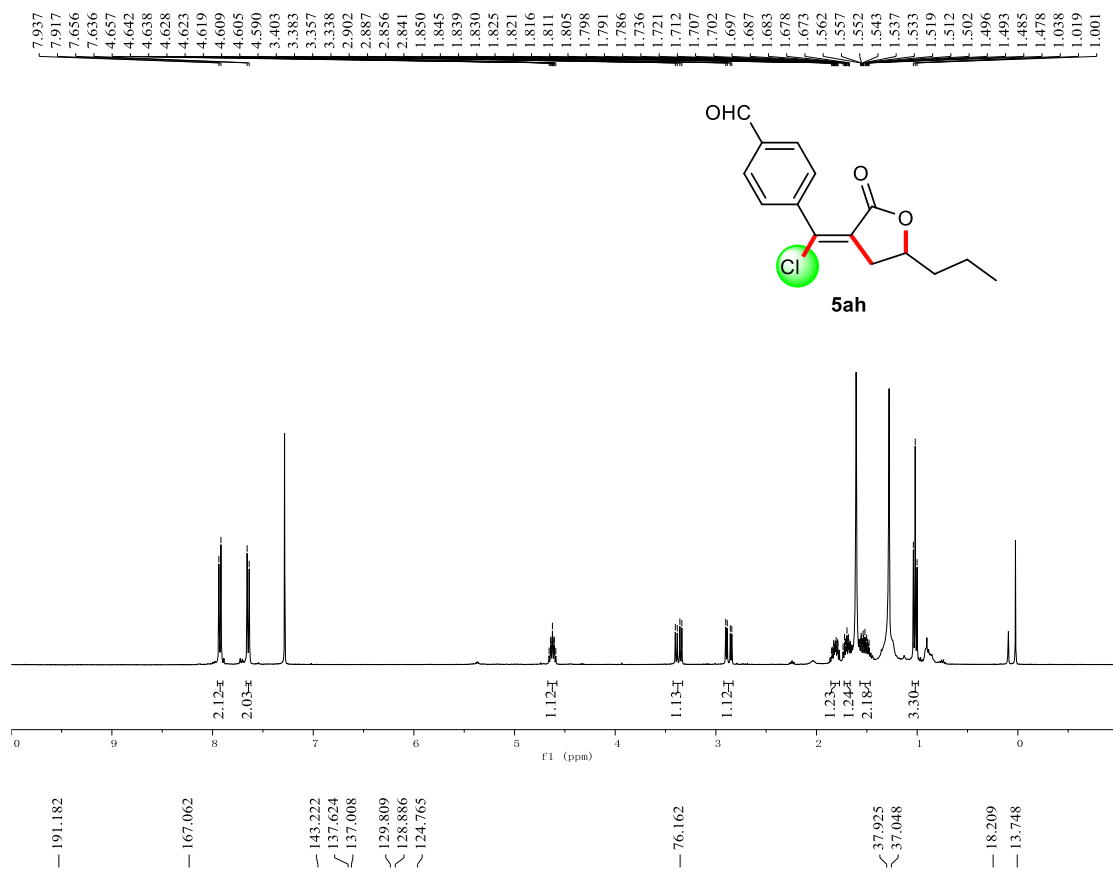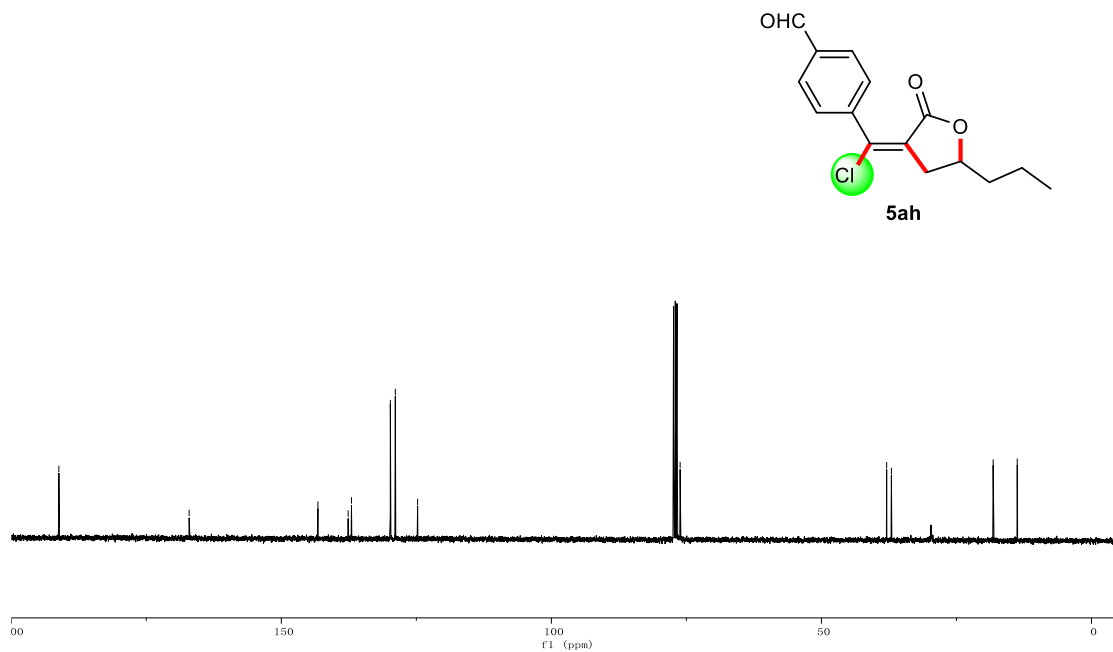

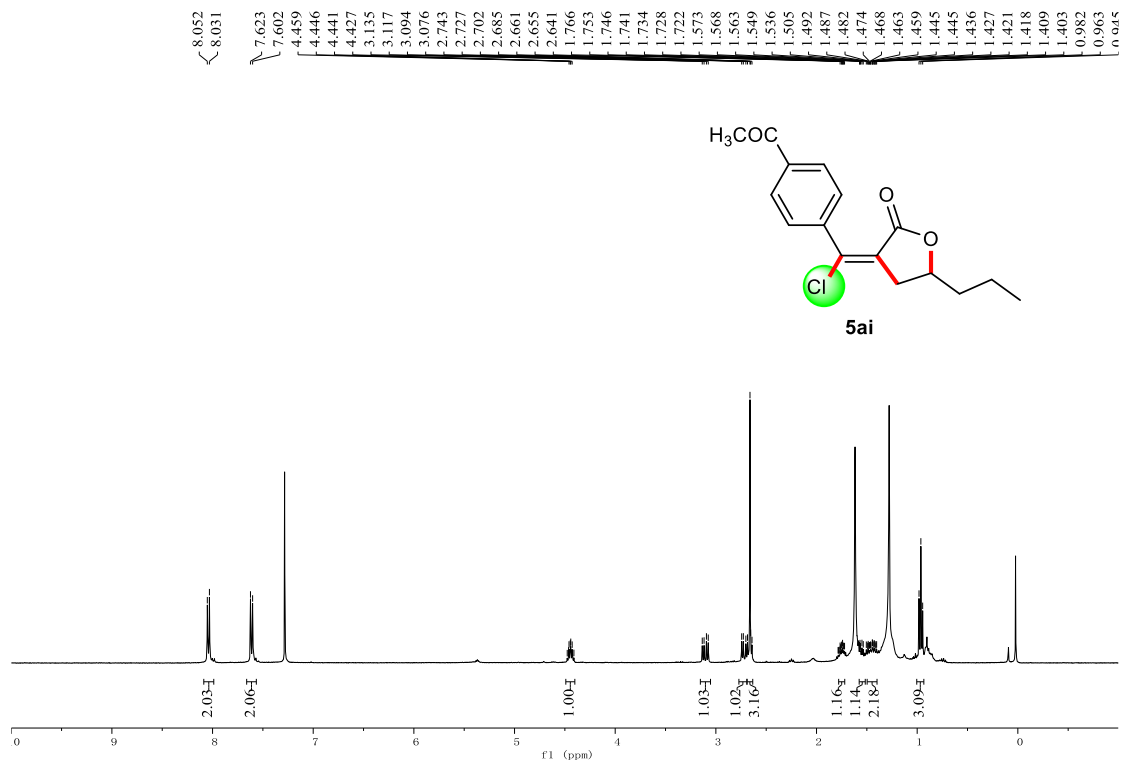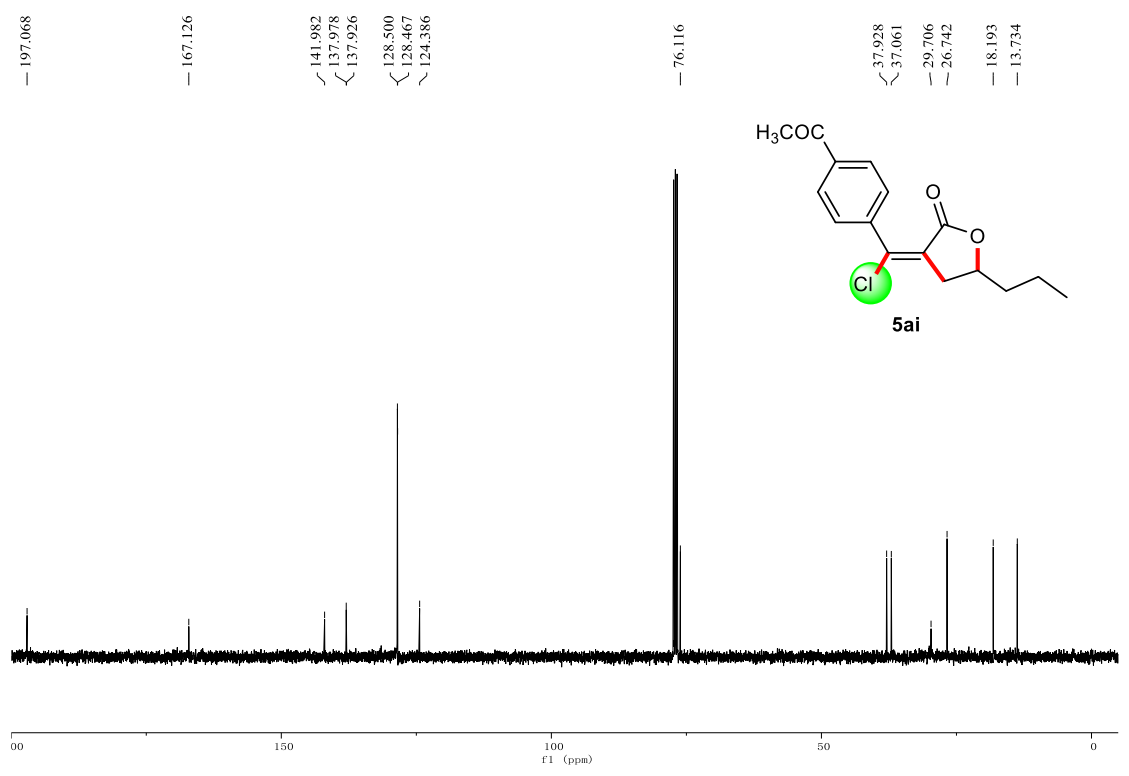

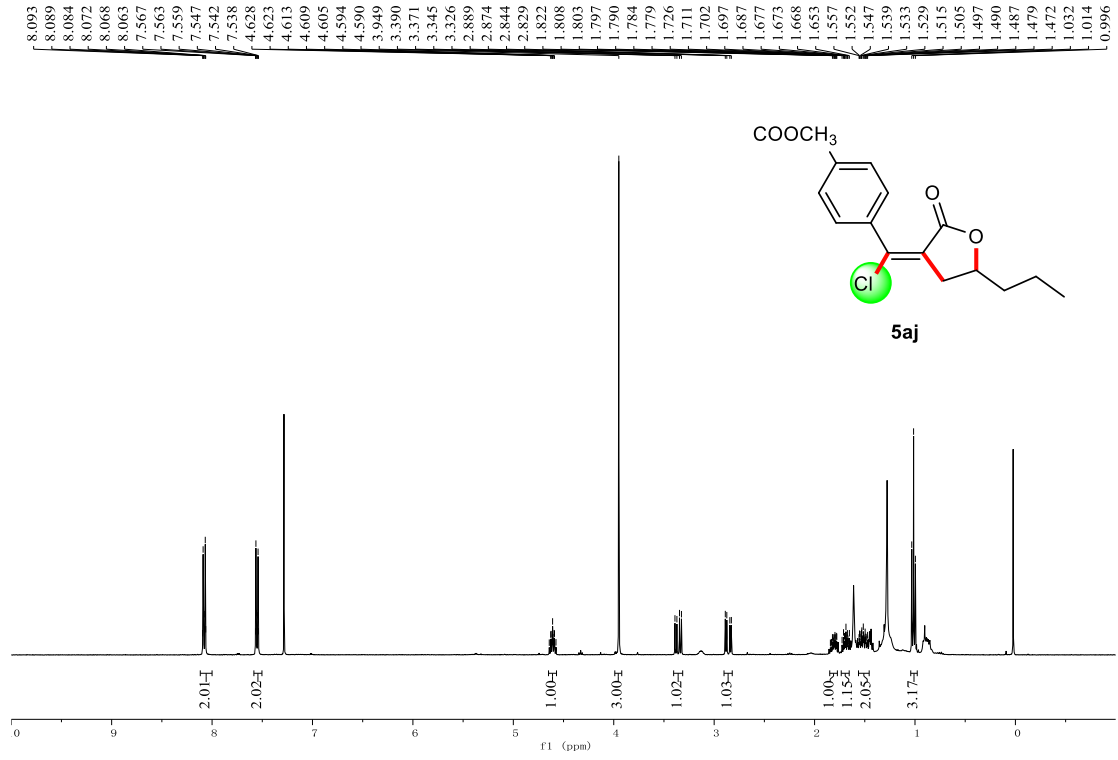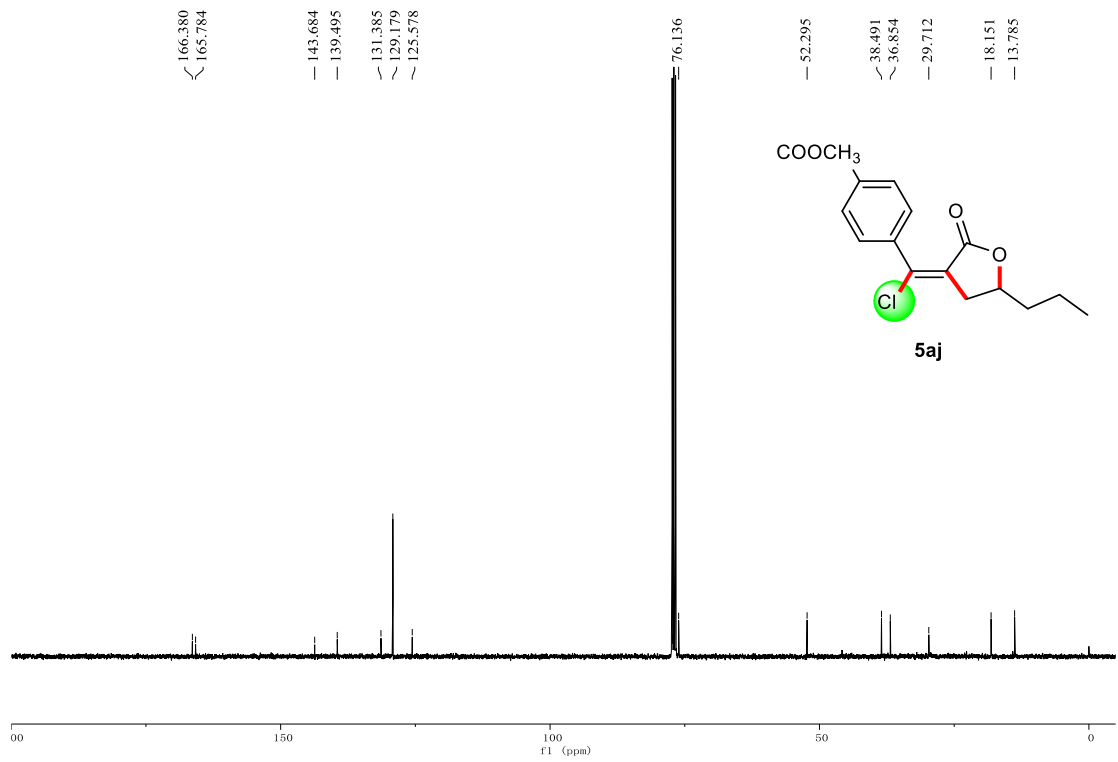

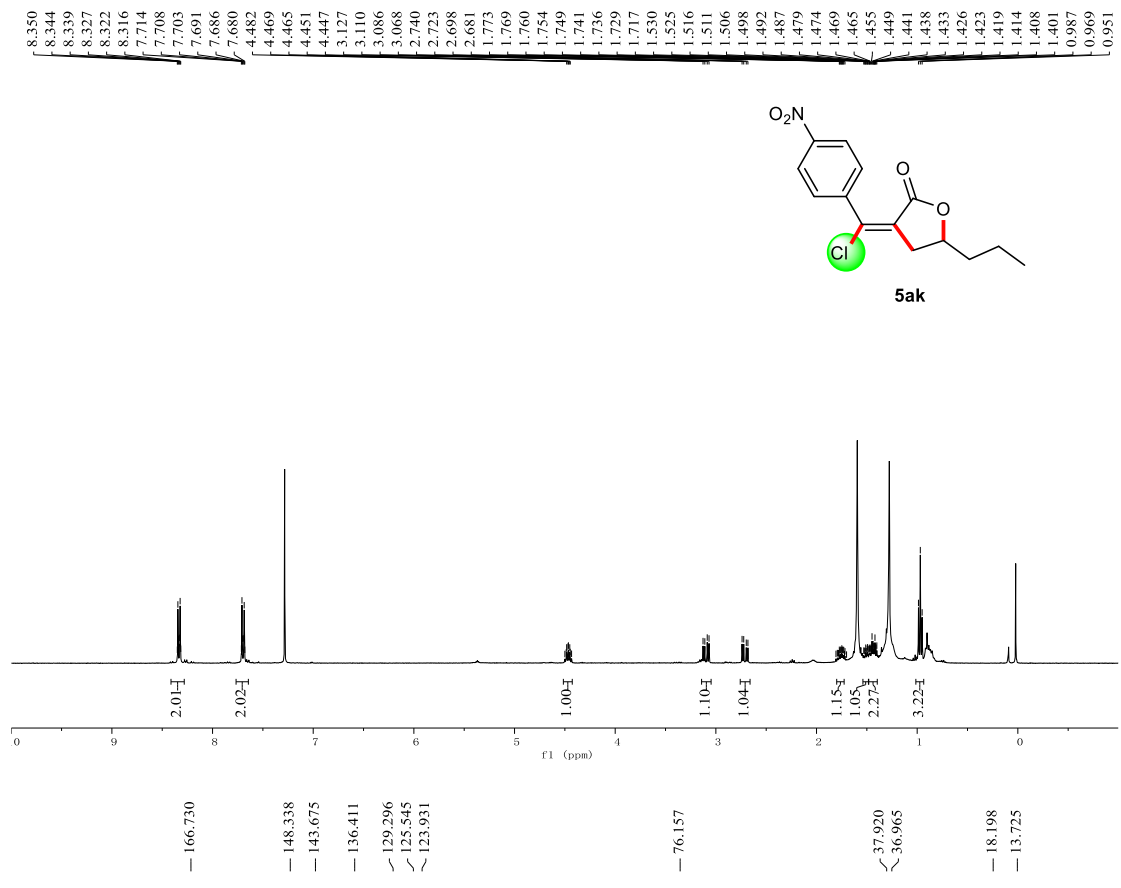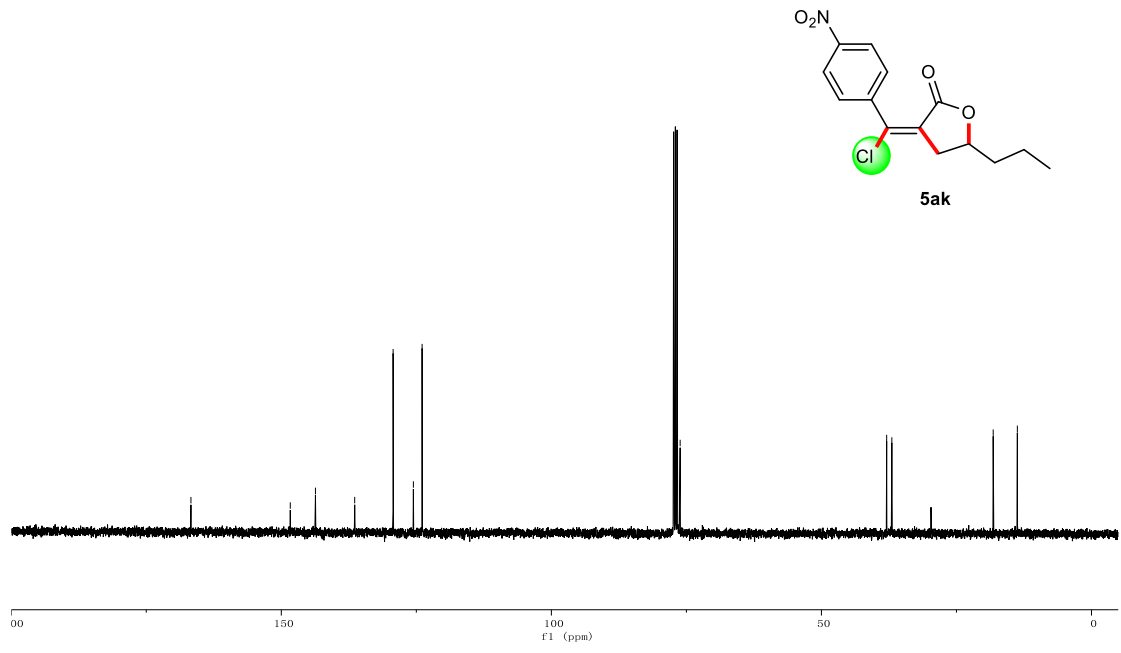

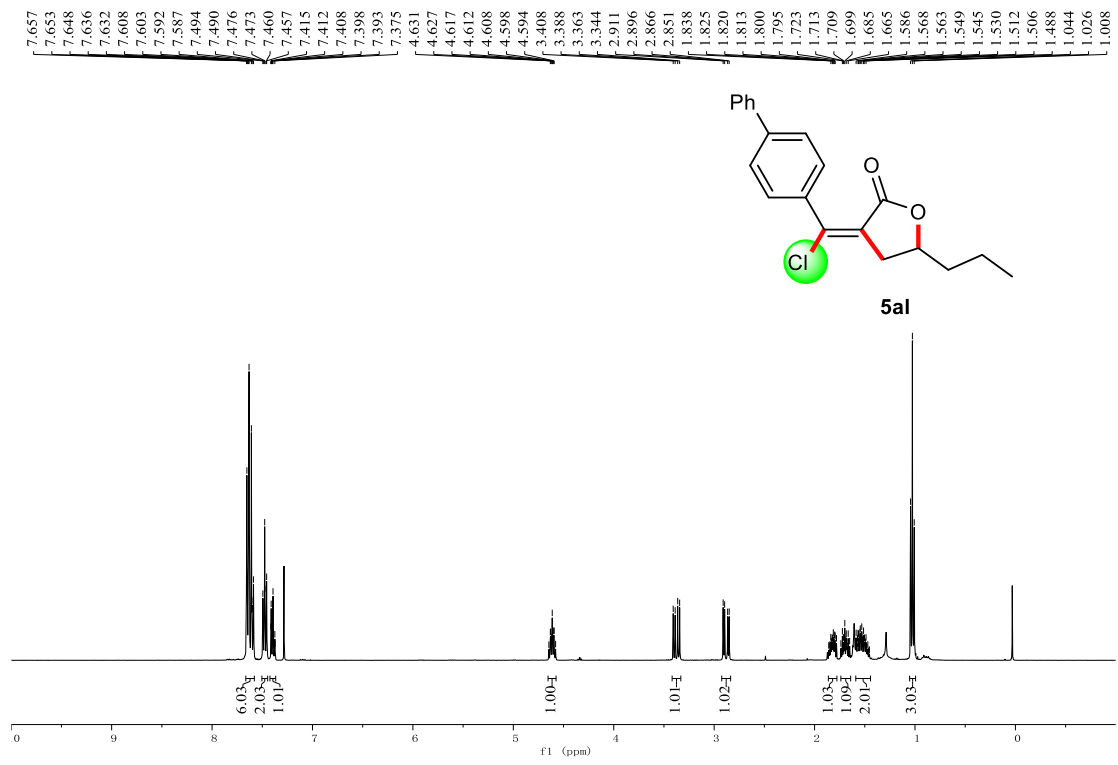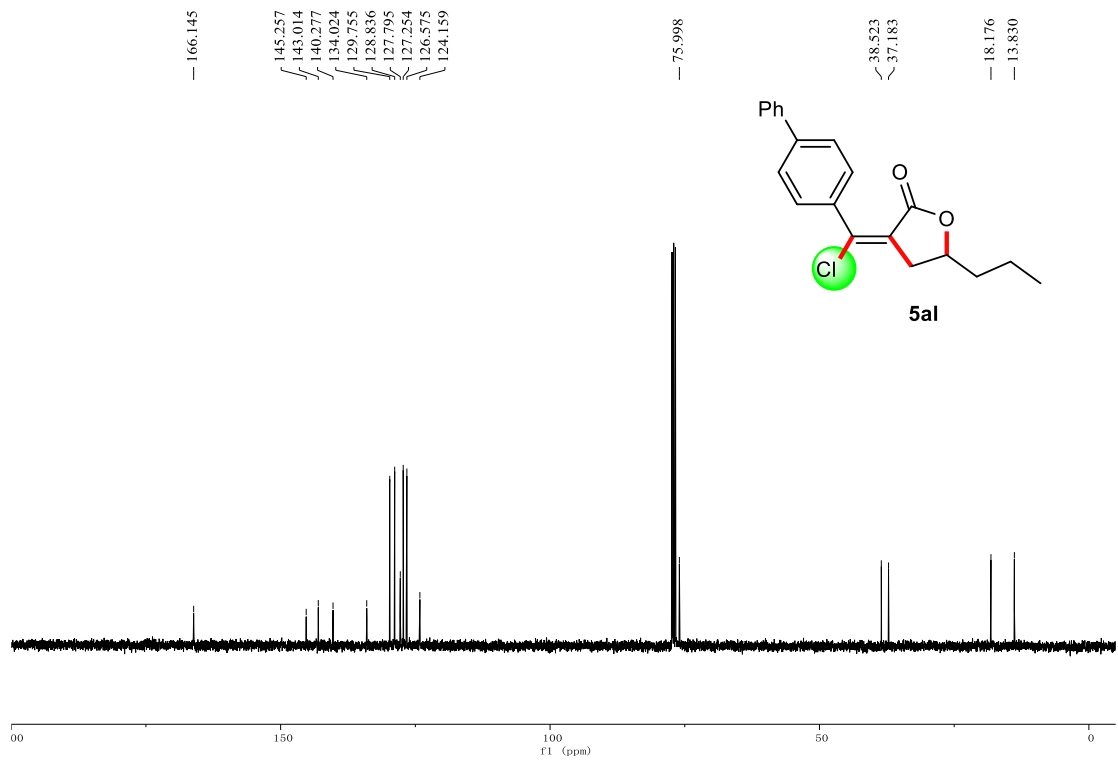

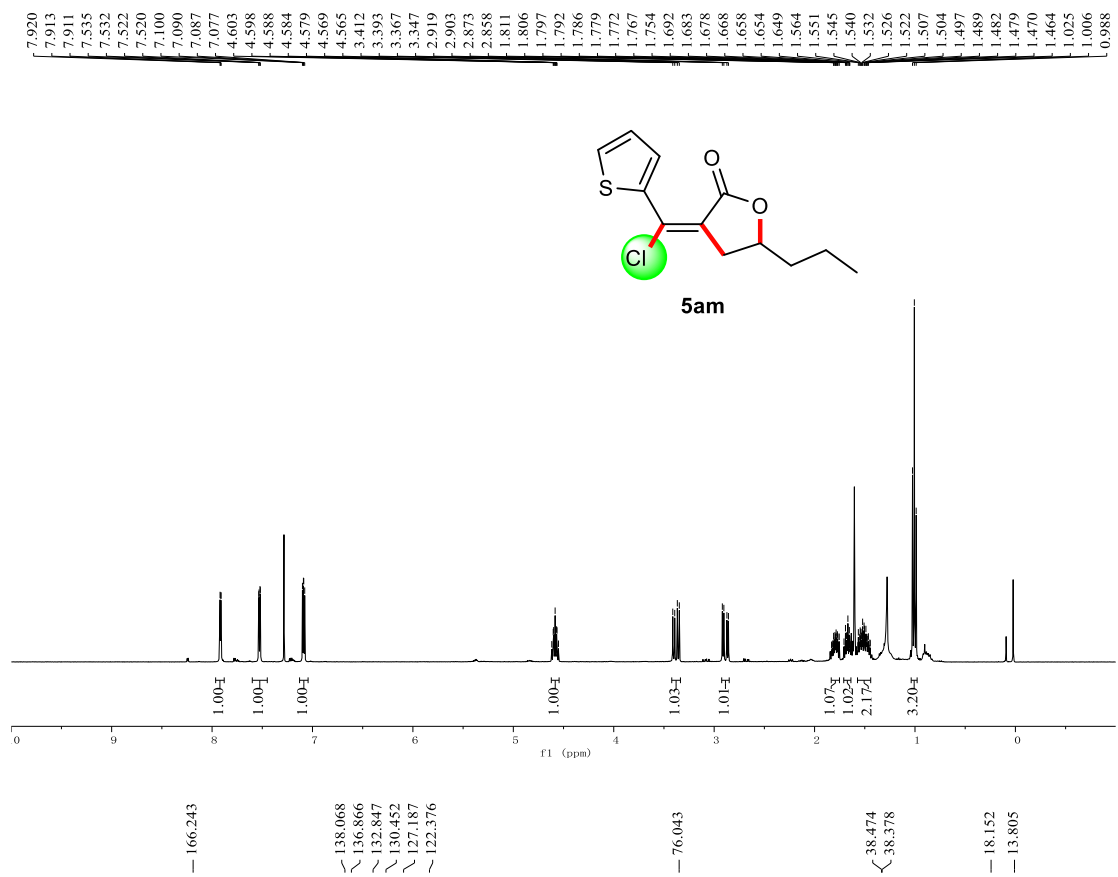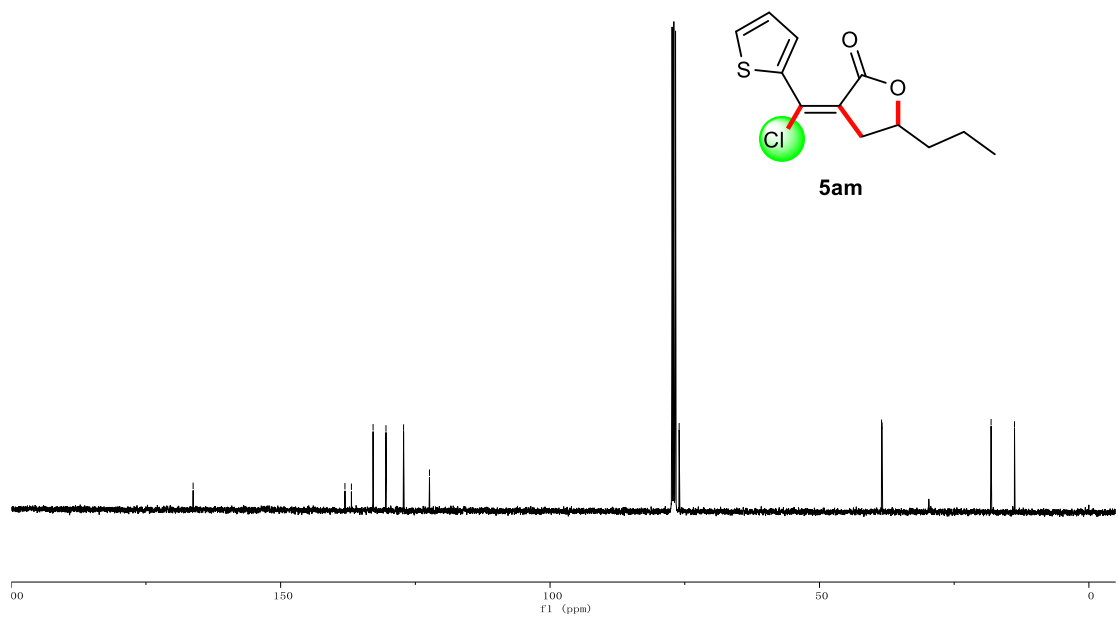



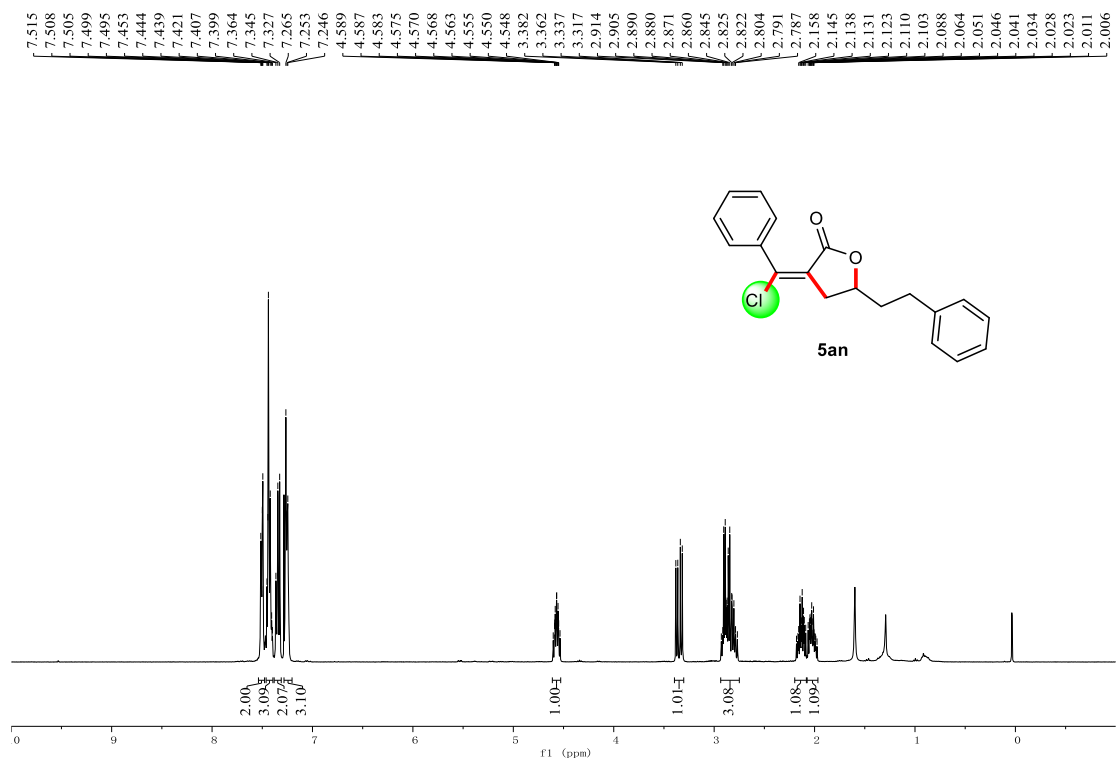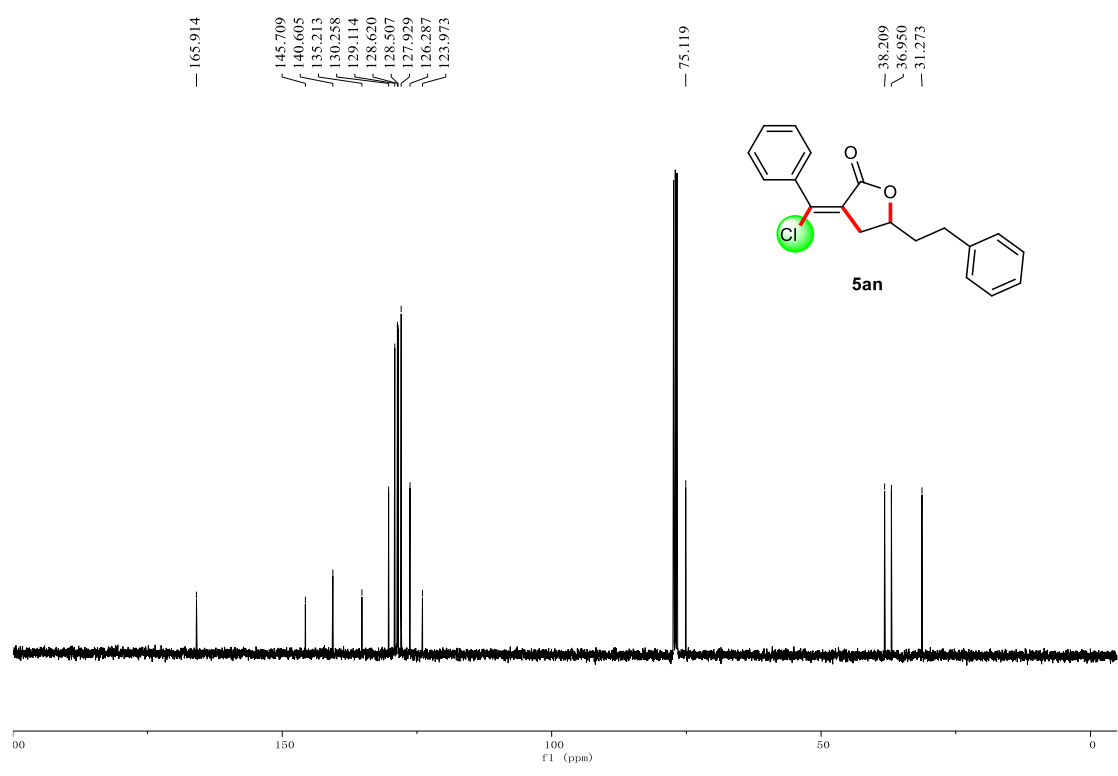

# $^1\text{H}$ and $^{13}\text{C}$ NMR spectra of compounds 6

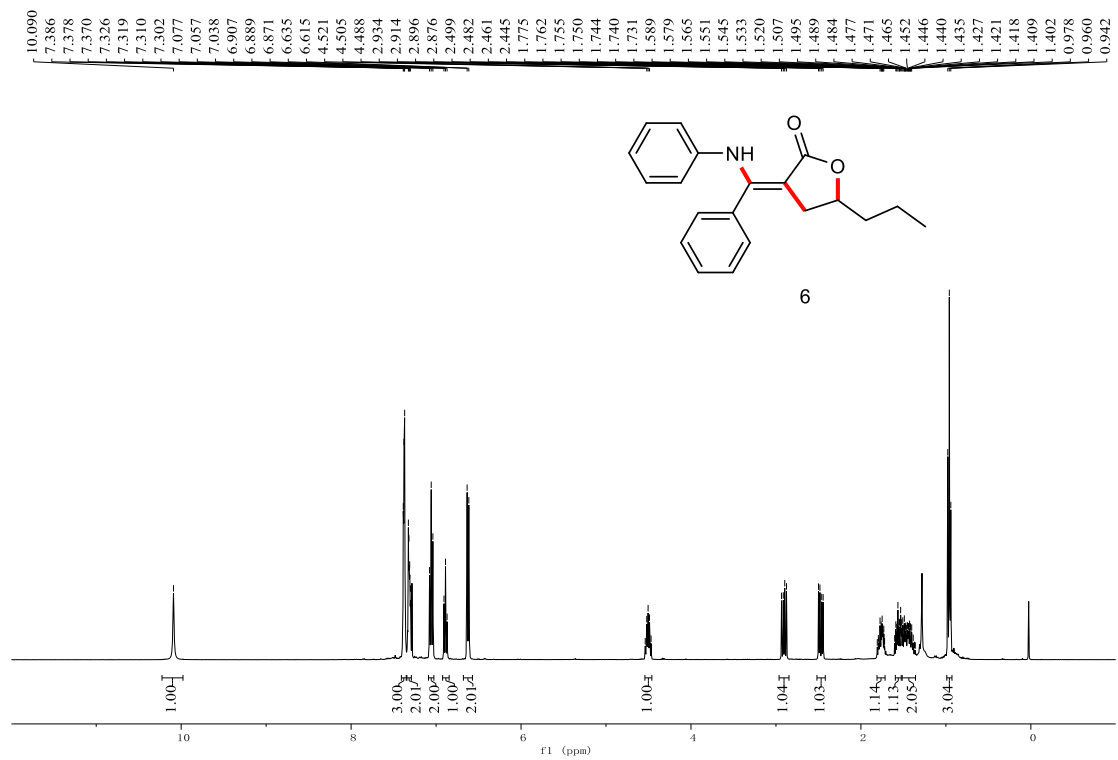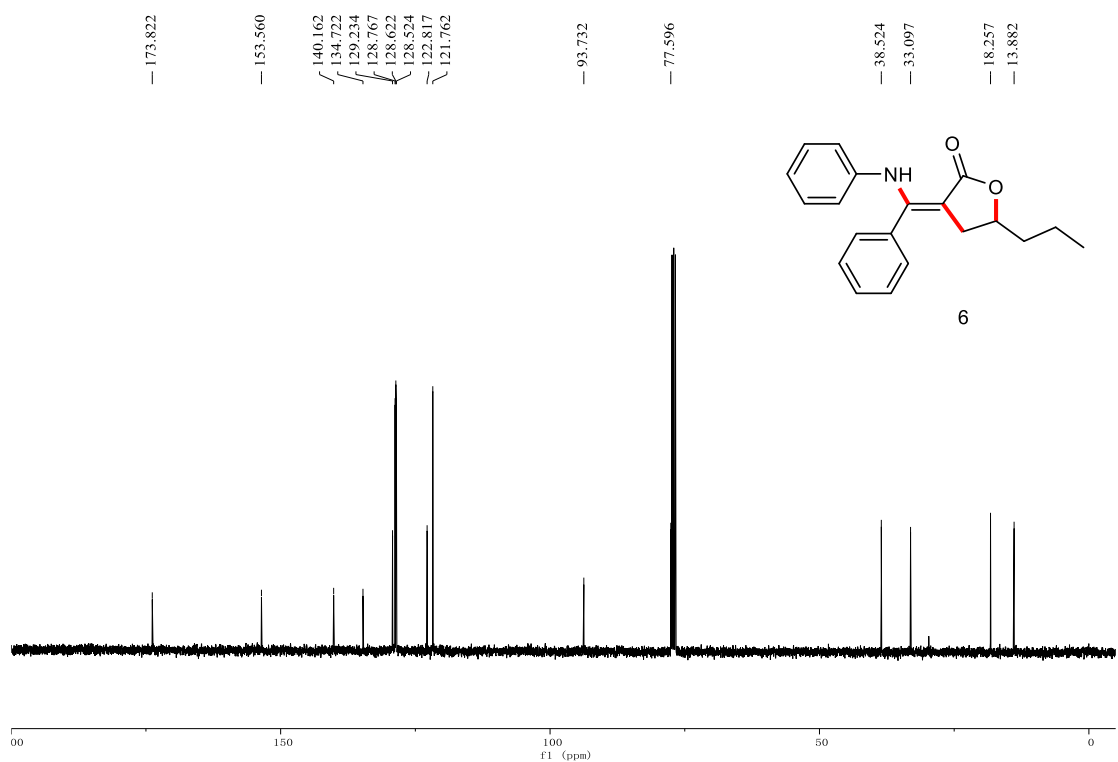

# <sup>1</sup>H and <sup>13</sup>C NMR spectra of compounds 7

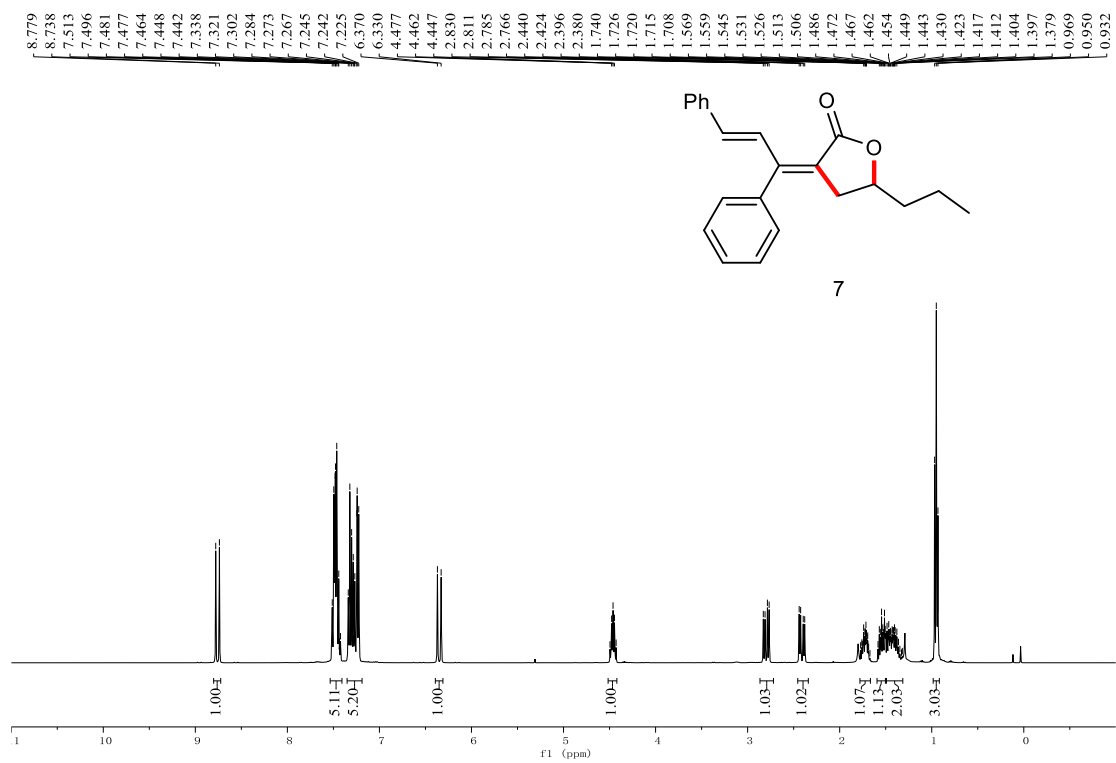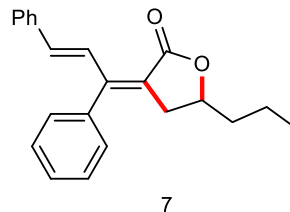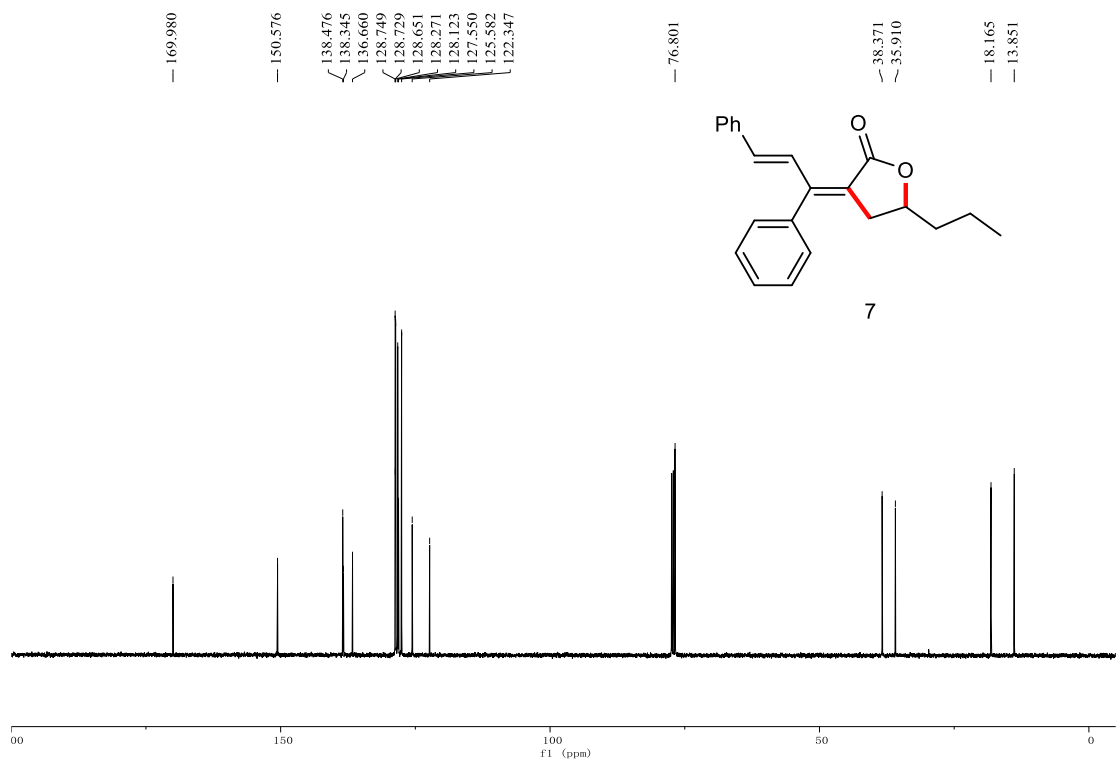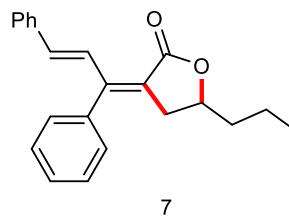

# <sup>1</sup>H and <sup>13</sup>C NMR spectra of compounds 8

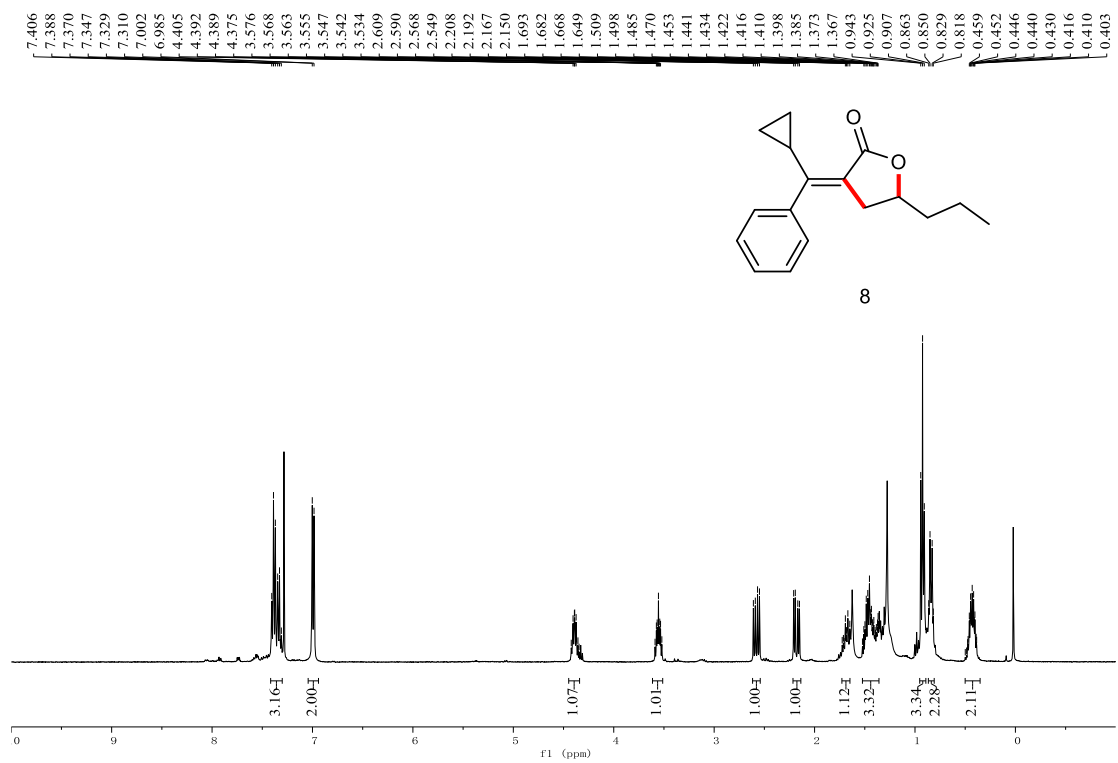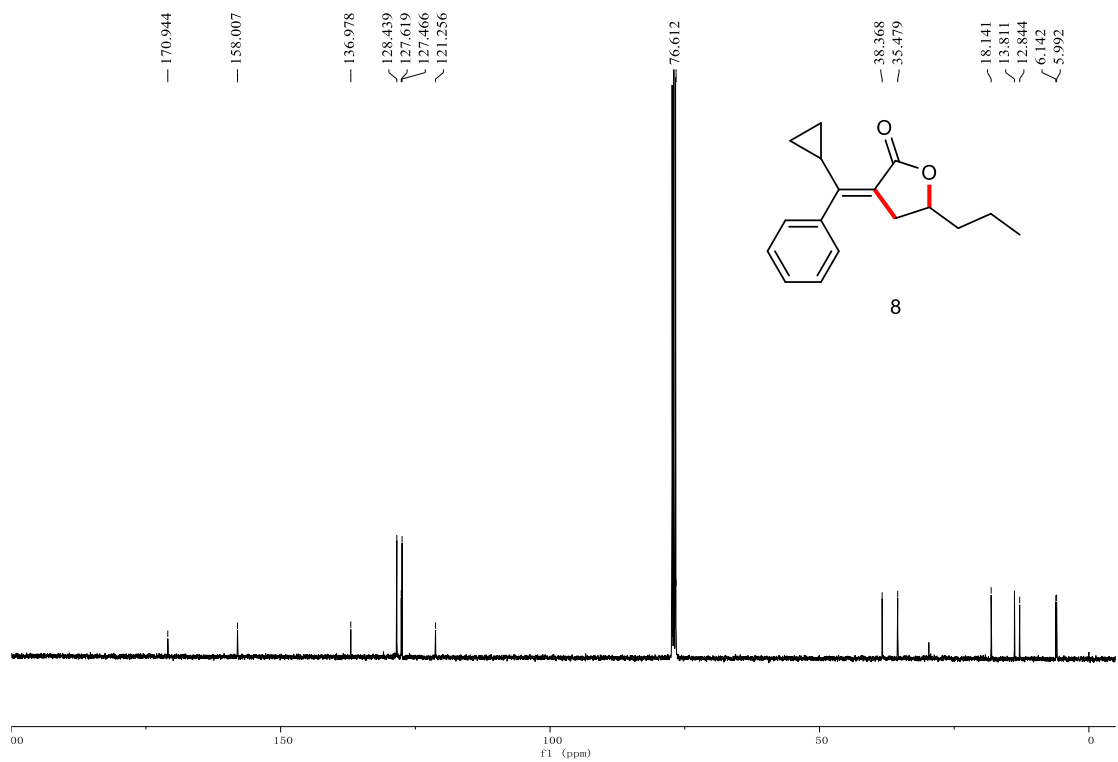

# <sup>1</sup>H and <sup>13</sup>C NMR spectra of compounds 9

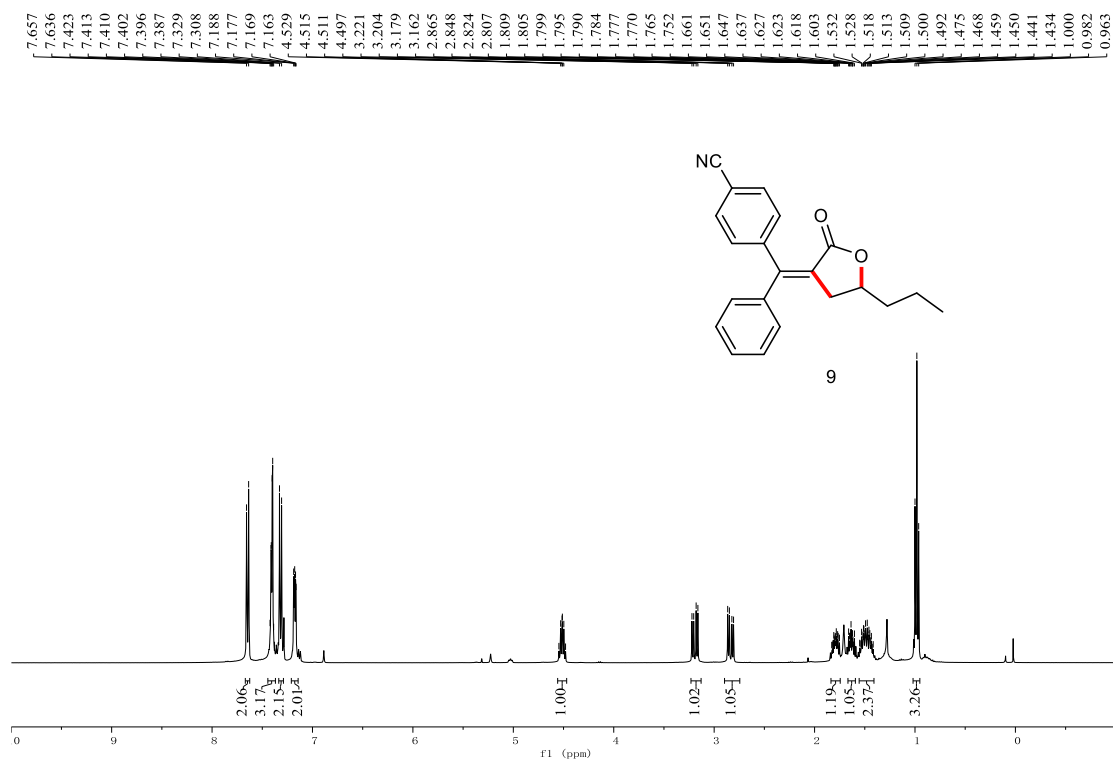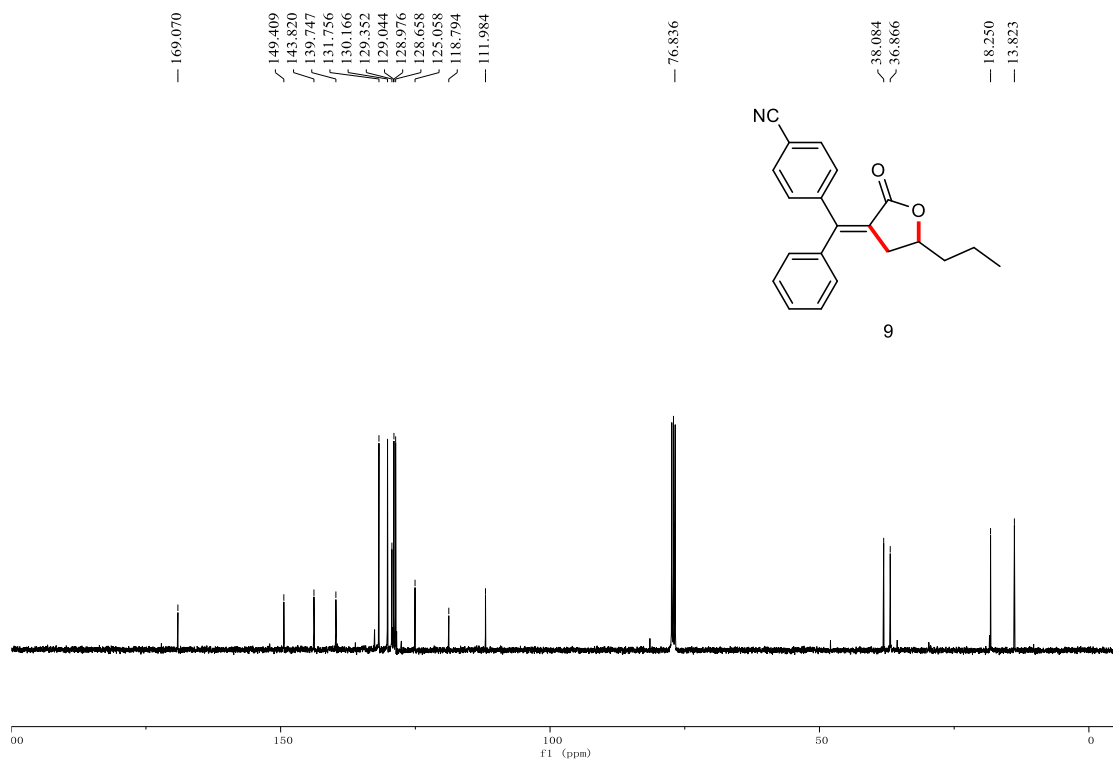

# <sup>1</sup>H and <sup>13</sup>C NMR spectra of compounds 10

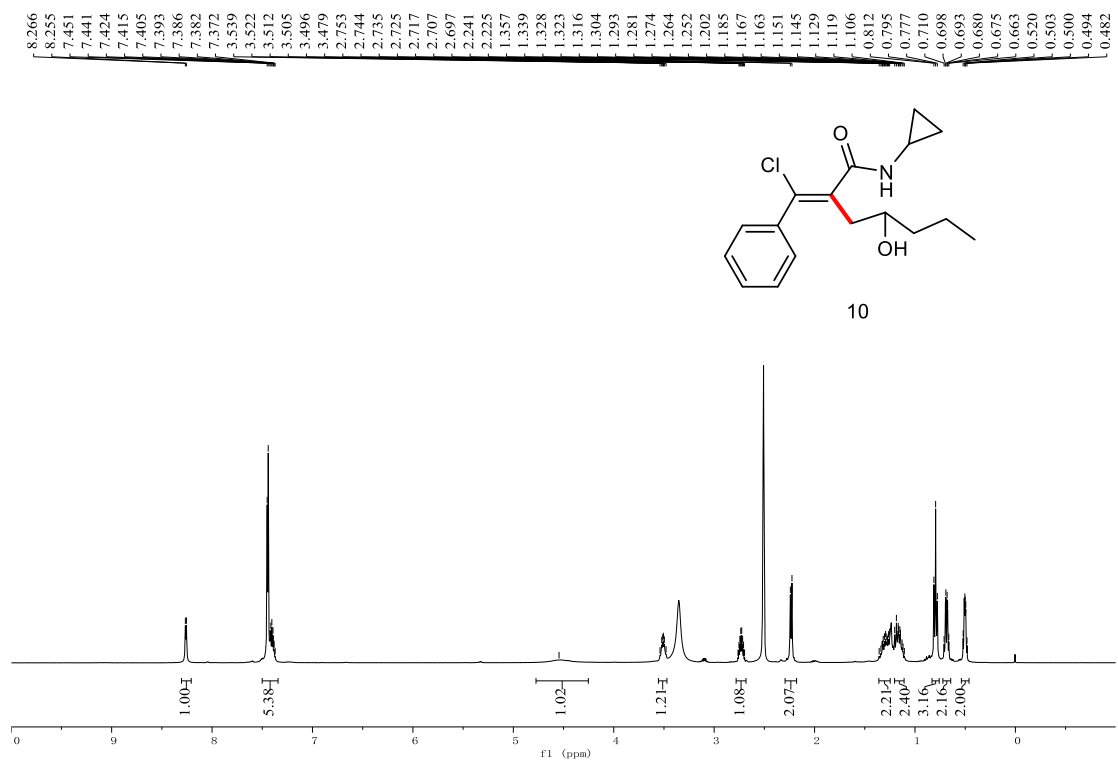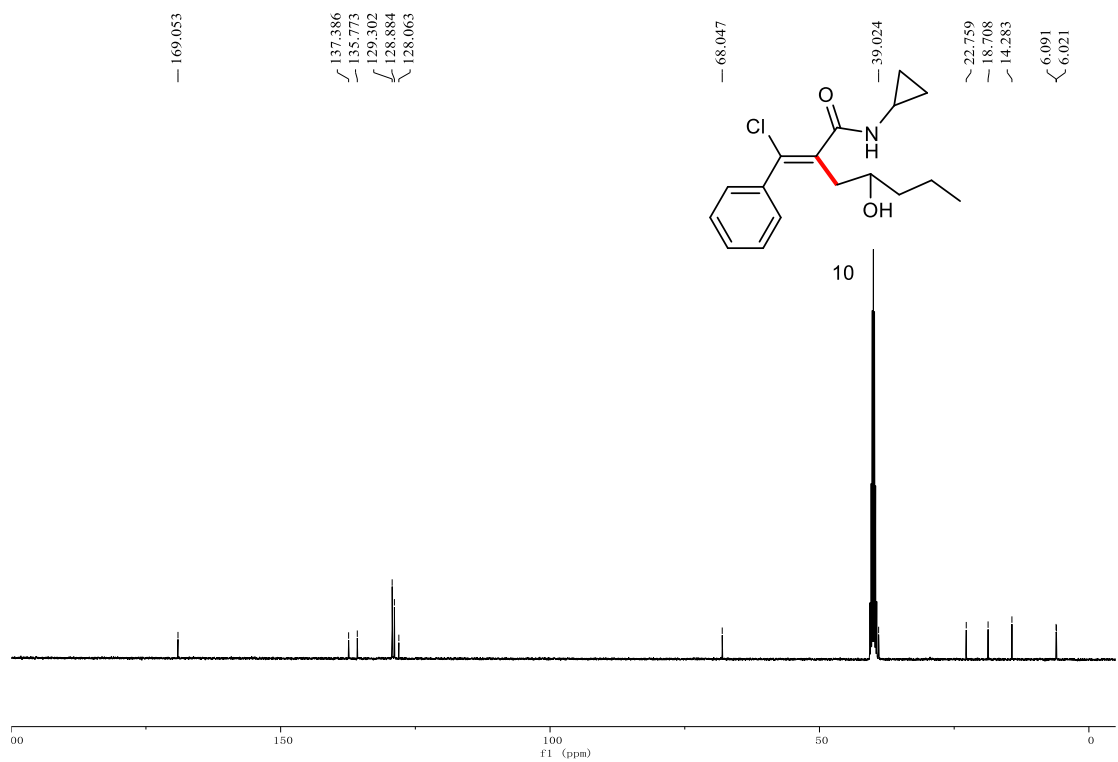

# $^1\text{H}$ and $^{13}\text{C}$ NMR spectra of compounds 11

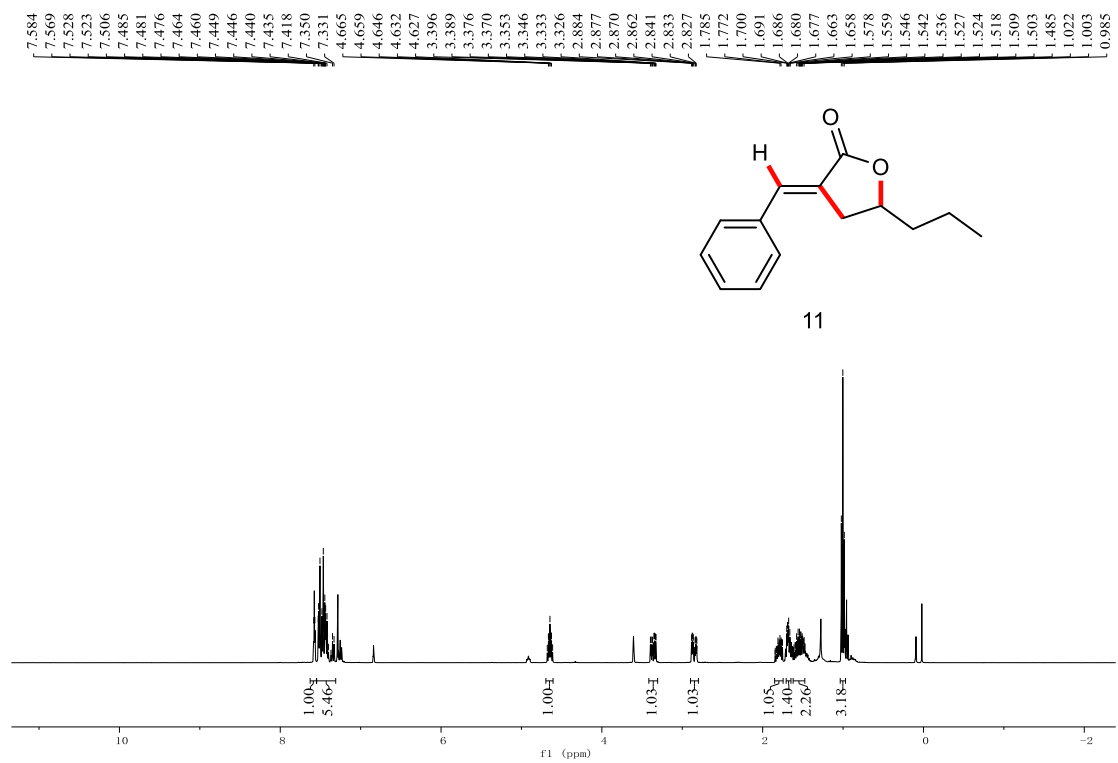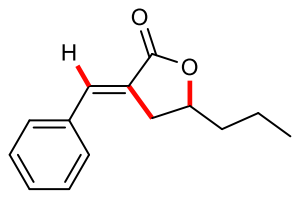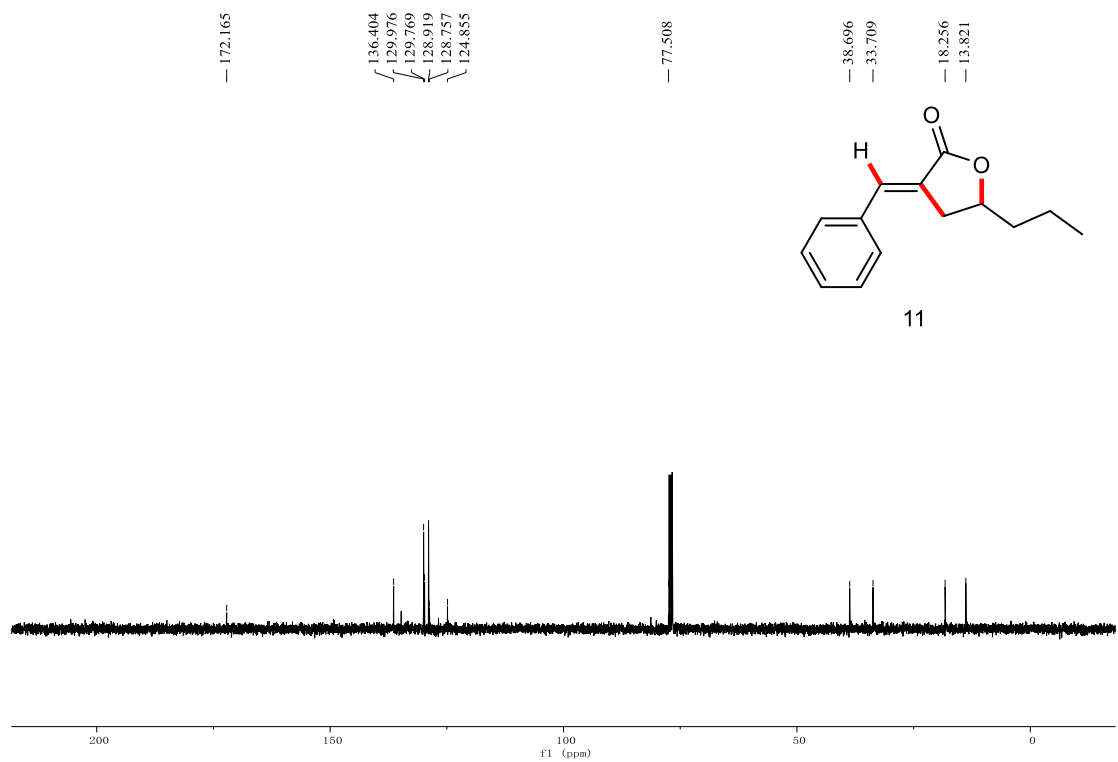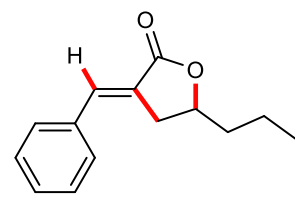

# <sup>1</sup>H and <sup>13</sup>C NMR spectra of compounds 12

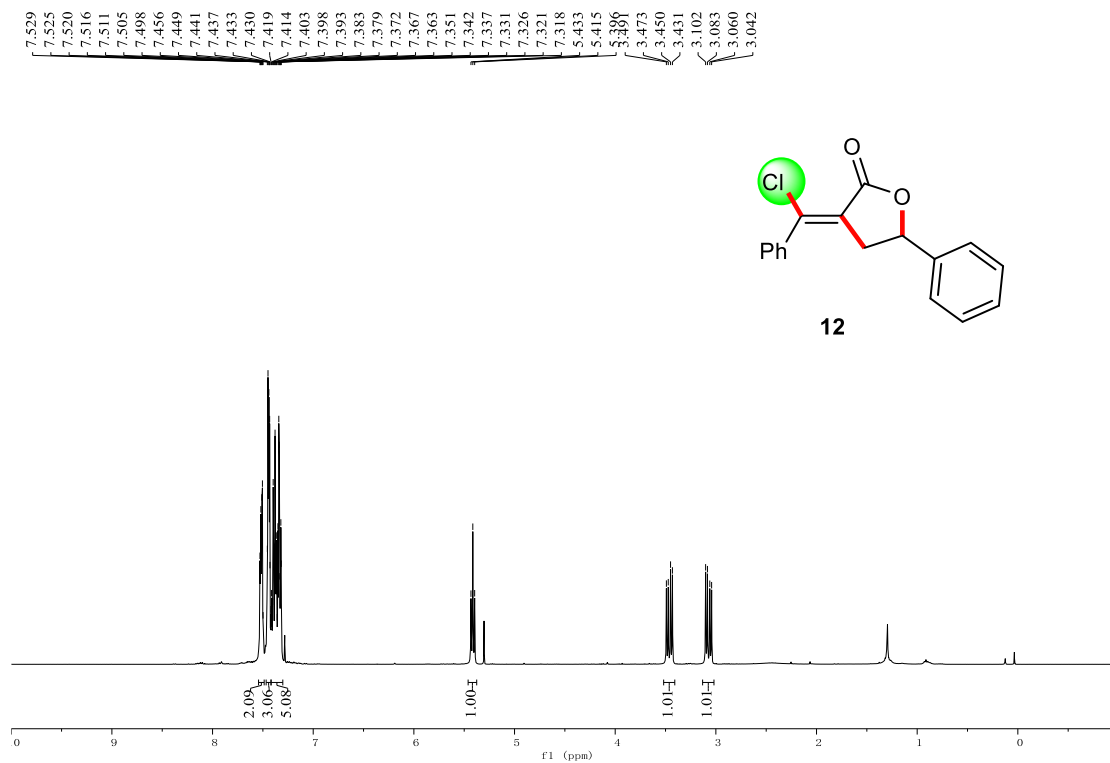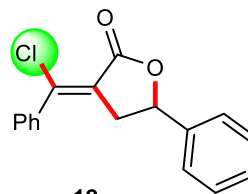

12

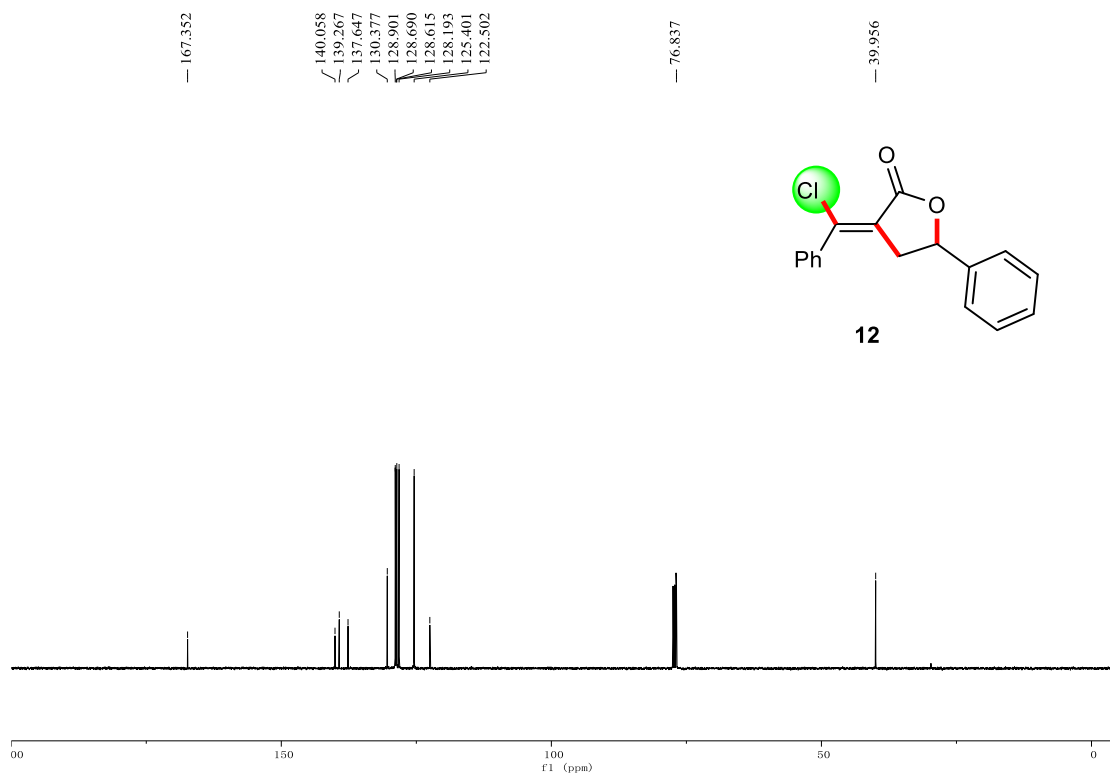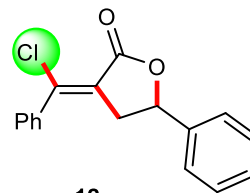

12



# $^1\text{H}$ and $^{13}\text{C}$ NMR spectra of compounds 13

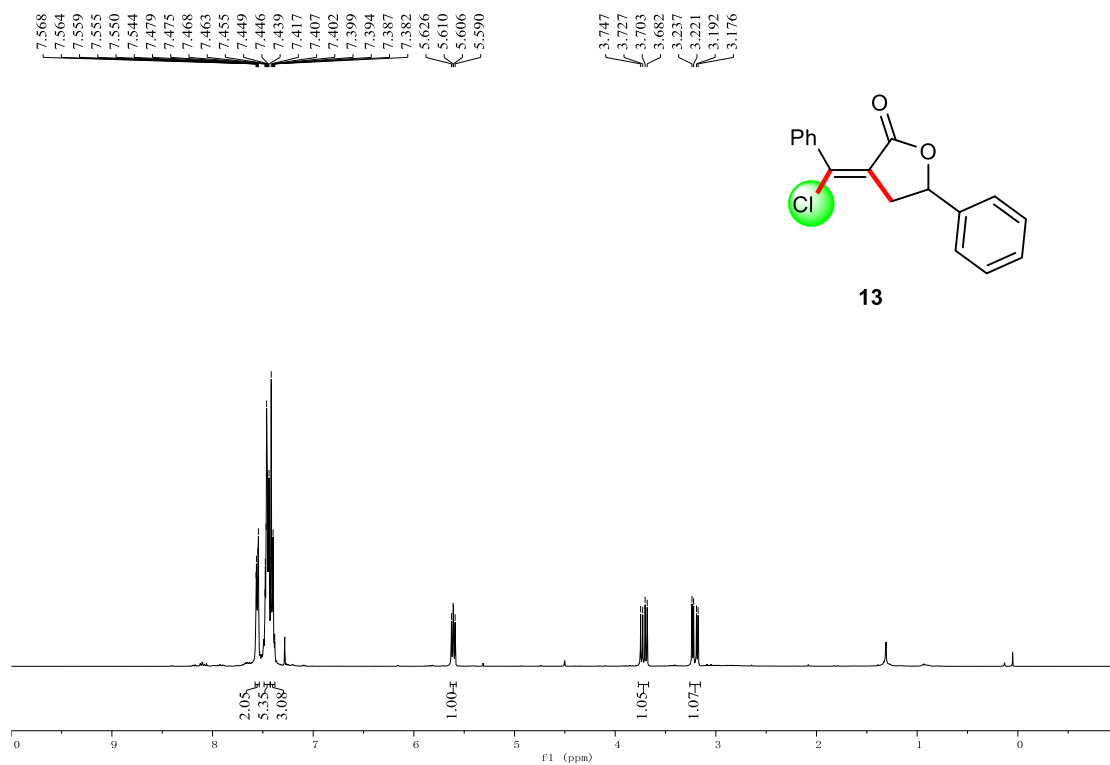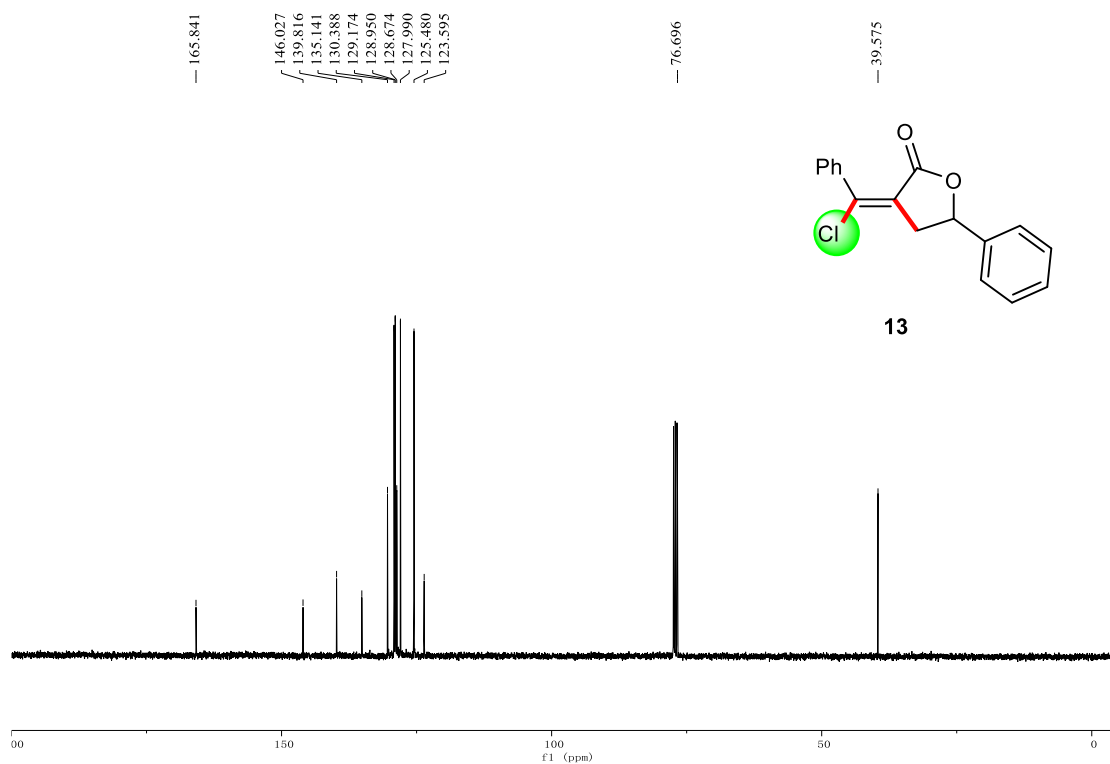

Supplement: d2qo01500e1.pdf [file d2qo01500e1.pdf]
